# Supplementary material
Source: PubMed Central journal article supplement (PMC7467677)
Supplement: ja9b13942_si_001.pdf [file ja9b13942_si_001.pdf]

# Aromatic Nanosandwich Obtained by $\sigma$ -Dimerization of a Nanographenoid $\pi$ -Radical

## Supplementary Information

by Liliia Moshniaha, Marika Żyła-Karwowska,  
Piotr J. Chmielewski, Tadeusz Lis, Joanna Cybińska, Elżbieta Gońka,  
Johannes Oschwald, Thomas Drewello, Samara Medina Rivero, Juan Casado,  
and Marcin Stępień\*

### Table of Contents

|                         |    |
|-------------------------|----|
| Experimental .....      | 2  |
| Synthesis.....          | 4  |
| Additional Figures..... | 10 |
| Additional Tables.....  | 29 |
| NMR Spectra.....        | 39 |
| Mass Spectra .....      | 43 |
| References.....         | 45 |

## Experimental

**General.** Tetrahydrofuran, toluene and N,N-dimethylformamide were dried using a commercial solvent purification system. Dichloromethane and chloroform were distilled from calcium hydride when used as reaction solvents. Deuterated camphorsulfonic acid-*d* was obtained by recrystallization of camphorsulfonic acid from deuterated water and acetic acid-*d*. All other solvents and reagents were used as received. Compound **5** was synthesized as previously reported.<sup>1</sup>

<sup>1</sup>H NMR spectra were recorded on high-field spectrometers (<sup>1</sup>H frequency 500.13 or 600.13 MHz), equipped with broadband inverse or conventional gradient probe heads. Spectra were referenced to the residual solvent signals (chloroform-*d* 7.24 ppm; toluene-*d*<sub>8</sub> 2.09 ppm). Two-dimensional NMR spectra were recorded with 2048 data points in the *t*<sub>2</sub> domain and up to 2048 points in the *t*<sub>1</sub> domain, with a 1.5 s recovery delay. All 2D spectra were recorded with gradient selection, with the exception of NOESY and ROESY. NOESY mixing time and ROESY spinlock time were 500 ms and 300 ms, respectively. <sup>13</sup>C NMR spectra were recorded with <sup>1</sup>H broadband decoupling and referenced to solvent signals (<sup>13</sup>CDCl<sub>3</sub>, 77.0 ppm).

High-resolution mass spectra were recorded using MALDI ionization in the positive mode. MALDI-ToF-MS was performed with a Bruker ultrafleXtreme in the positive-ion mode, using trans-2-[3-(4-*tert*-butylphenyl)-2-methyl-2-propenylidene]malonitrile (DCTB) as the matrix. The matrix-to-analyte ratio was 40:1.

Electrochemical measurements (dichloromethane, 293 K) were performed on an EA9C Multifunctional Electrochemical Analyzer using a glassy-carbon working electrode, platinum wire as the auxiliary electrode, and silver wire as a reference electrode. The voltammograms were referenced against the half-wave potential of Fc<sup>+</sup>/Fc.

Photoluminescence excitation (PLE) and emission (PL) spectra as well as decay kinetics (DEC) were taken with the FSL980-sm Fluorescence Spectrometer from Edinburgh Instruments Ltd. A 450 W Xenon arc lamp (PL and PLE) and a Super Continuum Fianium laser were used as excitation sources. Emission spectra were corrected for the recording system efficiency and excitation spectra were corrected for the incident light intensity. PLE and PL spectra and QY were measured using cooled extended red Hamamatsu photomultiplier operating in range 200 – 1050 nm. Quantum yield measurements were performed by using an Edinburgh Instruments integrating sphere equipped with a small elliptical mirror and a baffle plate for beam steering and shielding against directly detected light. For the measurement, the integrating sphere replaces the standard sample holder inside the sample chamber. Calculations of quantum yields were made using the software provided by Edinburgh Instruments.

**Irradiation of compound 4<sub>2</sub>.** Absorption spectroscopy: Absorption spectra were recorded using a Varian Cary 60 spectrophotometer. A toluene solution of **4<sub>2</sub>** was degassed with freeze-pump-thaw cycles and introduced into a glovebox. In the glovebox, the solution was transferred to a 1 mm quartz cuvette and kept in darkness. After that the cuvette was transferred to the measurement chamber of the spectrophotometer. After the first spectrum was recorded, the sample was irradiated with a UV lamp (365 nm) for 10 seconds, and the second spectrum was recorded immediately. 8 steps of irradiation were performed (the total time of irradiation was 80 seconds). The solution was irradiated until no further change of the electronic spectrum was observed. Once the experiment was finished, the sample was protected from light and introduced to the glovebox. After 12 h in darkness the experiment was repeated using the same condition on the same sample two more times. After that,

the same sample was irradiated with a LED lamp, observing the same changes in the spectra. (ESR spectra) A degassed solution of **4**<sub>2</sub> in toluene was transferred under inert conditions to a quartz test tube and protected from atmosphere and light. After the first ESR measurement was made, the solution was irradiated with a UV lamp for 5 minutes and a new ESR spectrum was recorded immediately; the irradiation of the sample was repeated 2 times using a UV lamp (365 nm) and then 2 times using a consumer white-light LED lamp. After all irradiation cycles were performed, kinetics of the radical decay were monitored over the course of 90 minutes.

**Computational methods.** Density functional theory (DFT) calculations were performed using Gaussian 16.<sup>2</sup> DFT geometry optimizations were carried out in unconstrained C<sub>1</sub> symmetry, using molecular mechanics or semi-empirical models as starting geometries. DFT geometries were refined to meet standard convergence criteria, and the existence of a local minimum was verified by a normal mode frequency calculation. Geometry optimizations, frequency calculations were performed using the hybrid functionals B3LYP and  $\omega$ B97XD and the 6-31G(d,p) basis set (3-21G for **4**<sub>2</sub>).<sup>3-6</sup> For compound **7** 50 electronic transitions, and for **4**<sub>2</sub> and **4**<sup>•</sup> 200 electronic transitions were calculated by means of time-dependent DFT (TD-DFT)<sup>7</sup>, using the hybrid functional B3LYP and the 6-31G(d,p) basis set (3-21G for **4**<sub>2</sub>). The same approach was also used for calculation of HOMO and LUMO energies.

Tight-binding density functional theory calculations were performed using xTB v. 6.1 with the GFN2 parameterization, and the GBSA solvation model for dichloromethane.<sup>8,9</sup> Geometries were refined to meet very tight (vtight) convergence criteria, and the existence of each local minimum was verified by a normal mode frequency calculation. Relaxed potential energy scans were performed with a step of 0.02 Å and a restraining force constant of 10 xTB units.

**X-ray crystallography.** X-ray quality crystals of **4**<sub>2</sub> were grown by vapor fusion, using DCM-toluene mixture as solvent and methanol as antisolvent. Diffraction measurements were performed on a geometry XCALIBUR diffractometer ( $\omega$  scans), equipped with an ONYX CCD camera, with graphite monochromatized Cu K $\alpha$  radiation. The data were collected at 100 K, corrected for Lorentz and polarization effects. Data collection, cell refinement, data reduction and analysis were carried out with the Xcalibur PX software, CRYCALIS CCD and CRYCALIS RED, respectively (Oxford Diffraction Ltd., Abignon, England, 2009). An analytical absorption correction was applied with the use of CRYCALIS RED. All structures were solved by direct methods with the SHELXS-97 program and refined using SHELXT-10 with anisotropic thermal parameters for non-H atoms.<sup>10</sup> In the final refinement cycles, all H atoms were treated as riding atoms in geometrically optimized positions. CCDC 1501094 contains the supplementary crystallographic data for this paper. These data can be obtained free of charge from the Cambridge Crystallographic Data Centre via [www.ccdc.cam.ac.uk/data\\_request/cif](http://www.ccdc.cam.ac.uk/data_request/cif).

## Synthesis

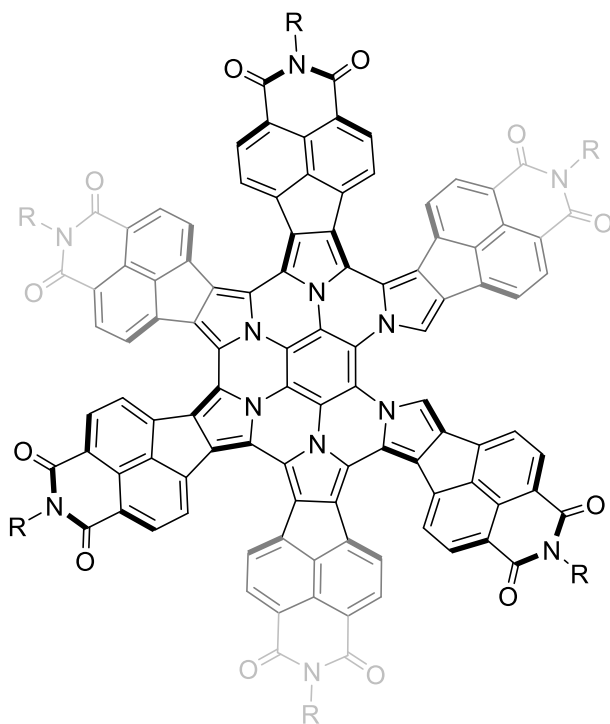

**Compound (6).** Under an inert atmosphere, **5** (100.0 mg) was dissolved in dichloromethane (10 mL). A 0.5 M oxygen-free solution of  $\text{FeCl}_3$  (0.77 mL) in dichloromethane (containing 10% nitromethane) was added. The reaction mixture was stirred at 18 °C for 1 h. After 1 h, the reaction mixture was washed with a 10% solution of KSCN in water (100 mL), water, and a 2% aqueous solution of hydrazine. The organic layer was stripped of solvent and dried under reduced pressure, to yield a dark violet solid (97 mg, 98%).  $^1\text{H NMR}$  (600 MHz, chloroform-*d*, 300 K):  $\delta$  8.80–8.72 (8H, m), 8.70 8.61 (4H, m), 8.32 (2H, s), 8.08 (2H, d,  $^3J = 7.2$  Hz), 7.82 (4H, m), 7.77 (2H, d,  $^3J = 7.4$  Hz), 7.69 (2H, d,  $^3J = 7.6$  Hz), 7.59 (2H, d,  $^3J = 7.5$  Hz), 7.48–7.41 (6H, m), 7.38–7.23 (12H, m), 2.95–2.50 (12H, m), 1.28–0.92 (72H, m).  $^{13}\text{C NMR}$  (151 MHz, chloroform-*d*, 300 K):  $\delta$  163.8, 163.7, 163.7, 163.7, 145.9, 145.8, 145.7, 145.7, 137.5, 137.5, 137.2, 137.2, 137.0, 137.0, 136.6, 136.6, 136.4, 136.3, 136.2, 136.1, 133.0, 132.9, 132.9, 132.8, 132.8, 132.7, 130.9, 130.8, 130.8, 129.69, 129.6, 129.4, 129.4, 129.1, 129.1, 128.7, 128.1, 128.0, 127.4, 126.9, 126.9, 126.0, 125.7, 125.7, 125.51, 125.3, 124.2, 124.2, 124.1, 124.0, 121.9, 121.9, 121.8, 121.8, 121.7, 121.7, 121.6, 121.6, 121.5, 121.26, 121.2, 120.6, 117.5, 117.3, 116.2, 116.1, 115.9, 113.2, 110.9, 110.3, 29.3, 29.3, 29.2, 29.2, 29.2, 29.1, 24.1, 24.1, 24.1, 24.0, 24.0. **HRMS** (MALDI–TOF):  $m/z$ :  $[\text{M}]^+$  Calcd for  $\text{C}_{174}\text{H}_{128}\text{N}_{12}\text{O}_{12}$ : 2576.9769; Found 2576.9713. **UV-vis** (dichloromethane, 300 K)  $\lambda$  [nm] ( $\epsilon$  in  $\text{M}^{-1} \text{cm}^{-1}$ ): 354 (105 800) 370 (108 500), 561 (67 300), 610 (50 400).

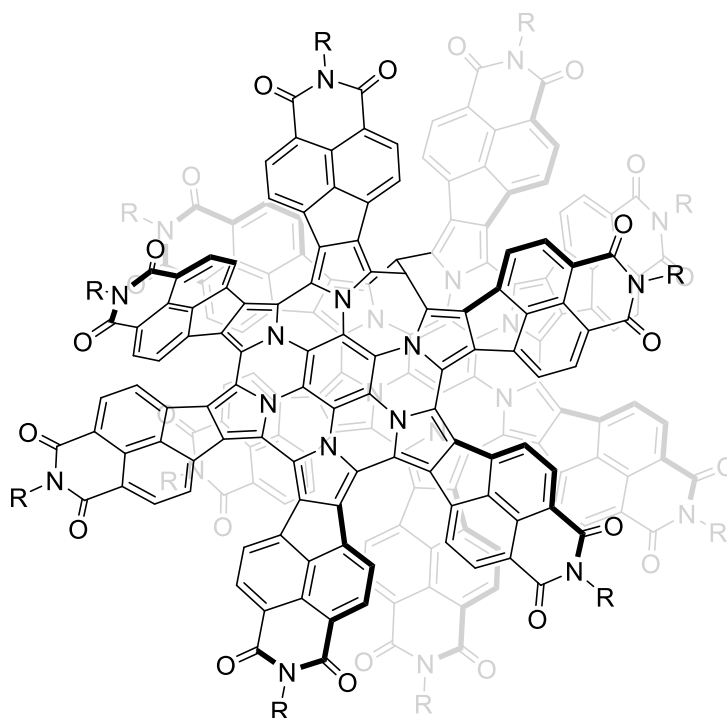

**Compound (4<sub>2</sub>).** In an inert-atmosphere glovebox, a mixture of **6** (70.0 mg, 0.028 mmol), paraformaldehyde (3.3 mg, 0.109 mmol), and camphorsulfonic acid (38.6 mg, 0.163 mmol) was transferred to a pressure tube and dissolved in 150  $\mu$ L of chloroform. The tube was sealed, taken out of the glovebox and heated at 90  $^{\circ}$ C for 17 h. The mixture was diluted with water and extracted with chloroform (50 mL  $\times$  3). Organic fractions were combined and the solvent was removed under reduced pressure. The residue was subjected to column chromatography (grade V alumina, chloroform stabilized with amylene). The pure product was obtained as the third fraction, and isolated as a dark violet solid (49.6 mg, 70%). **<sup>1</sup>H NMR** (600 MHz, chloroform-*d*, 300 K):  $\delta$  9.03 (2H, d,  $^3J = 7.7$  Hz), 8.93 (2H, d,  $^3J = 7.7$  Hz), 8.83 (4H, m), 8.75 (2H, d,  $^3J = 7.7$  Hz), 8.64 (4H, m), 8.36 (2H, d,  $^3J = 7.4$  Hz), 8.31 (2H, d,  $^3J = 7.4$  Hz), 8.27 (2H, d,  $^3J = 7.3$  Hz), 8.06 (4H, m), 7.99 (2H, d,  $^3J = 7.2$  Hz), 7.74 (2H, d,  $^3J = 7.7$  Hz), 7.65 (4H, m), 7.57-7.34 (32H, m), 7.33-7.25 (6H, m), 7.23-7.18 (6H, m), 7.15 (2H, d,  $^3J = 7.6$  Hz), 7.11 (2H, d,  $^3J = 7.2$  Hz), 7.00 (2H, d,  $^3J = 7.6$  Hz), 6.92-6.87 (4H, m), 3.11 (2H, m), 3.03 (2H, m), 2.91-2.79 (8H, m), 2.75-2.61 (6H, m), 2.47 (4H, m), 2.14 (2H, m), 1.45-0.89 (132H, m), 0.48 (12H, m). **<sup>13</sup>C NMR** (151 MHz, chloroform-*d*, 300 K):  $\delta$  163.4, 163.3, 163.2, 163.2, 163.0, 162.7, 162.5, 162.1, 146.5, 146.4, 146.1, 146.0, 145.8, 145.6, 145.6, 145.5, 145.4, 145.4, 145.2, 144.6, 137.5, 137.4, 137.3, 136.7, 136.5, 135.5, 135.1, 135.1, 135.1, 134.9, 134.7, 134.5, 134.4, 134.3, 133.7, 133.5, 133.4, 132.8, 132.7, 132.5, 132.4, 131.6, 130.9, 130.9, 130.8, 130.8, 130.4, 130.2, 130.2, 130.0, 129.8, 129.7, 129.5, 129.3, 129.1, 128.3, 128.0, 127.9, 127.8, 127.6, 127.3, 127.2, 127.1, 126.8, 126.8, 126.7, 126.6, 126.4, 126.3, 126.1, 125.7, 124.9, 124.6, 124.3, 124.28, 124.2, 124.0, 123.9, 123.8, 123.6, 123.1, 123.0, 122.8, 122.7, 122.6, 122.5, 122.4, 122.0, 121.7, 121.6, 121.5, 121.4, 121.2, 120.3, 119.7, 117.0, 116.9, 116.9, 116.1, 116.2, 115.9, 114.8, 114.5, 113.6, 112.3, 112.1, 111.2, 111.1, 47.97, 37.5, 37.5, 37.4, 37.1, 32.8, 31.9, 29.7, 29.7, 29.4, 28.0, 27.1, 26.8, 24.4, 24.3, 24.2, 24.1, 25.0, 25.0, 22.7, 19.8, 14.1. **HRMS** (MALDI-TOF):  $m/z$ : [M]<sup>+</sup> Calcd for C<sub>350</sub>H<sub>254</sub>N<sub>24</sub>O<sub>24</sub>: 5176.94197; Found 5176.9596. **UV-vis** (Dichloromethane, 300 K)  $\lambda$  [nm] ( $\epsilon$  in M<sup>-1</sup> cm<sup>-1</sup>): 340 (226 300), 565 (167 400), 600 (160 400).

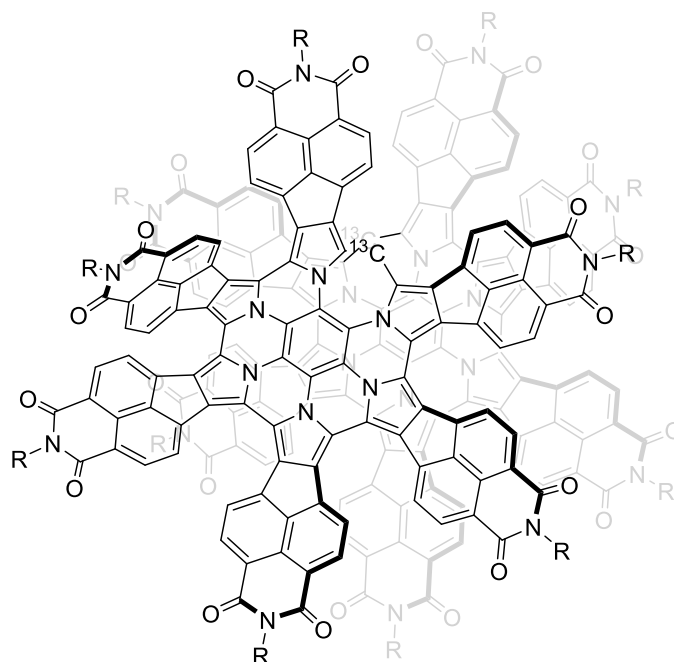

**Compound (4<sub>2-c<sub>2</sub></sub>).** The procedure followed that given for 4<sub>2</sub>, using 6 (70.0 mg, 0.028 mmol), <sup>13</sup>C-labeled paraformaldehyde (3.4 mg, 0.109 mmol) and camphorsulfonic acid (38.6 mg, 0.163 mmol). Yield: 54.9 mg (74%). **<sup>1</sup>H NMR** (600 MHz, chloroform-*d*, 300 K): δ 9.03 (2H, d, <sup>3</sup>*J* = 7.7 Hz), 8.93 (2H, d, <sup>3</sup>*J* = 7.7 Hz), 8.83 (4H, m), 8.75 (2H, d, <sup>3</sup>*J* = 7.7 Hz), 8.64 (4H, m), 8.36 (2H, d, <sup>3</sup>*J* = 7.4 Hz), 8.31 (2H, d, <sup>3</sup>*J* = 7.4 Hz), 8.27 (2H, d, <sup>3</sup>*J* = 7.3 Hz), 8.06 (4H, m), 7.98 (2H, d, <sup>3</sup>*J* = 7.2 Hz), 7.75 (2H, d, <sup>3</sup>*J* = 7.7 Hz), 7.65 (4H, m), 7.57-7.25 (38H, m), 7.23-7.18 (6H, m), 7.15 (2H, d, <sup>3</sup>*J* = 7.6 Hz), 7.11 (2H, d, <sup>3</sup>*J* = 7.2 Hz), 7.00 (2H, d, <sup>3</sup>*J* = 7.6 Hz), 6.92-6.67 (4H, m), 3.11 (2H, m), 3.03 (2H, m), 2.91-2.79 (8H, m), 2.75-2.61 (6H, m), 2.47 (4H, m), 2.14 (2H, m), 1.45-0.89 (132H, m), 0.48 (12H, m). **<sup>13</sup>C NMR** (151 MHz, chloroform-*d*, 300 K): δ 163.4, 163.3, 163.2, 163.2, 163.0, 162.7, 162.5, 162.1, 146.5, 146.4, 146.1, 146.0, 145.8, 145.6, 145.6, 145.5, 145.4, 145.4, 145.2, 144.6, 137.5, 137.4, 137.3, 136.7, 136.5, 135.5, 135.1, 135.1, 135.1, 134.9, 134.7, 134.5, 134.4, 134.3, 133.7, 133.5, 133.4, 132.8, 132.7, 132.5, 132.4, 131.6, 130.9, 130.9, 130.8, 130.8, 130.4, 130.2, 130.2, 130.0, 129.8, 129.7, 129.5, 129.3, 129.1, 128.3, 128.0, 127.9, 127.8, 127.6, 127.3, 127.2, 127.1, 126.8, 126.8, 126.7, 126.6, 126.4, 126.3, 126.1, 125.7, 124.9, 124.6, 124.3, 124.28, 124.2, 124.0, 123.9, 123.8, 123.6, 123.1, 123.0, 122.8, 122.7, 122.6, 122.5, 122.4, 122.0, 121.7, 121.6, 121.5, 121.4, 121.2, 120.3, 119.7, 117.0, 116.9, 116.9, 116.1, 116.2, 115.9, 114.8, 114.5, 113.6, 112.3, 112.1, 111.2, 111.1, 47.97, 37.5, 37.5, 37.4, 37.1, 32.8, 31.9, 29.7, 29.7, 29.4, 28.0, 27.1, 26.8, 24.4, 24.3, 24.2, 24.1, 25.0, 25.0, 22.7, 19.8, 14.1. **HRMS** (MALDI-TOF): *m/z*: [M]<sup>+</sup> Calcd for C<sub>348</sub><sup>13</sup>C<sub>2</sub>H<sub>254</sub>N<sub>24</sub>O<sub>24</sub>: 5177.94545; Found 5177.9496.

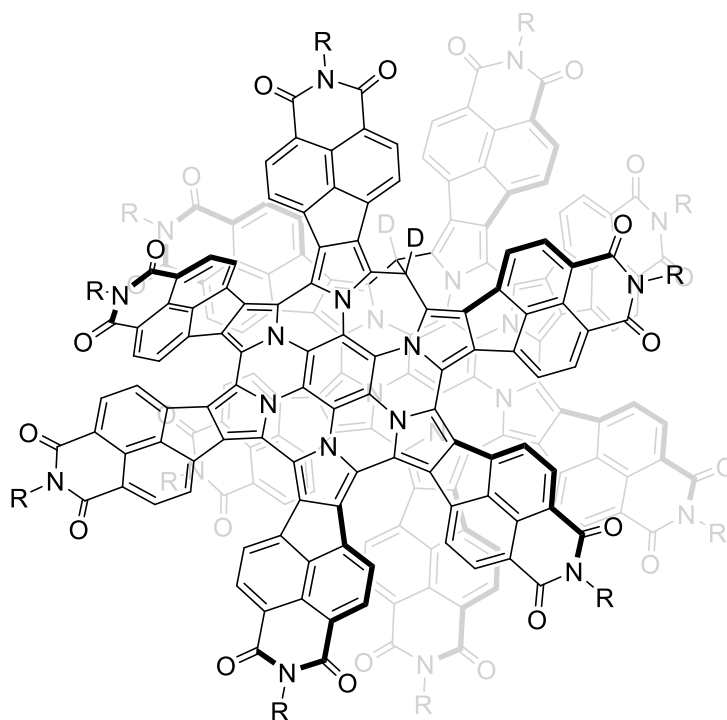

**Compound (4<sub>2</sub>-d<sub>2</sub>).** The procedure followed that given for 4<sub>2</sub>, using **6** (30.0 mg, 0.012 mmol), deuterated paraformaldehyde (1.8 mg, 0.059 mmol) and camphorsulfonic acid-*d* (18.9 mg, 0.084 mmol) in 75  $\mu$ L of chloroform. Yield: 20.7 mg (67%). <sup>1</sup>H NMR (600 MHz, chloroform-*d*, 300 K):  $\delta$  9.03 (2H, d, <sup>3</sup>J = 7.7 Hz), 8.93 (2H, d, <sup>3</sup>J = 7.7 Hz), 8.83 (4H, m), 8.75 (2H, d, <sup>3</sup>J = 7.7 Hz), 8.64 (4H, m), 8.36 (2H, d, <sup>3</sup>J = 7.4 Hz), 8.31 (2H, d, <sup>3</sup>J = 7.4 Hz), 8.27 (2H, d, <sup>3</sup>J = 7.3 Hz), 8.06 (4H, m), 7.97 (2H, d, <sup>3</sup>J = 7.2 Hz), 7.74 (2H, d, <sup>3</sup>J = 7.7 Hz), 7.65 (4H, m), 7.57-7.25 (38H, m), 7.23-7.18 (6H, m), 7.15 (2H, d, <sup>3</sup>J = 7.6 Hz), 7.11 (2H, d, <sup>3</sup>J = 7.2 Hz), 7.00 (2H, d, <sup>3</sup>J = 7.6 Hz), 6.89 (2H, d, <sup>3</sup>J = 7.4 Hz), 3.11 (2H, m), 3.03 (2H, m), 2.91-2.79 (8H, m), 2.75-2.61 (6H, m), 2.47 (4H, m), 2.14 (2H, m), 1.45-0.89 (132H, m), 0.48 (12H, m). HRMS (MALDI-TOF):  $m/z$ : [(M/2)]<sup>+</sup> Calcd for (C<sub>350</sub>H<sub>252</sub>D<sub>2</sub>N<sub>24</sub>O<sub>24</sub>)/2: 2588.9754; Found 2588.9973.

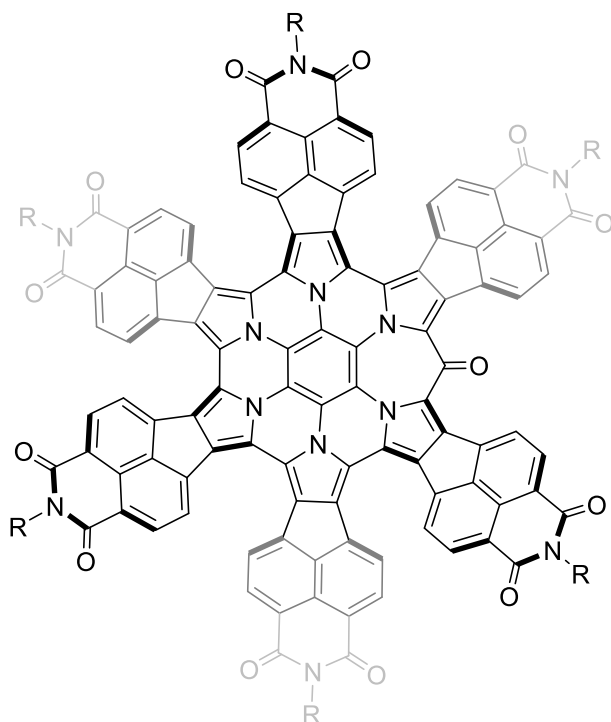

**Compound (7). 4<sub>2</sub>** (6 mg, 1  $\mu$ mol) was dissolved in toluene (0.5 mL). The solution was irradiated with a UV lamp. After 0.5 h the solution was exposed to air for additional 12 h. The crude mixture was then purified using column chromatography (grade V alumina, chloroform stabilized with amylene). The pure product was obtained as a green solid (5 mg, 81%). **<sup>1</sup>H NMR** (600 MHz, chloroform-*d*<sub>1</sub>, 300 K):  $\delta$  9.51 (2H, d,  $^3J = 7.2$  Hz), 8.91 (2H, d,  $^3J = 7.2$  Hz), 8.83-8.72 (6H, m), 8.69 (2H, d,  $^3J = 7.2$  Hz), 8.65 (2H, d,  $^3J = 7.4$  Hz), 7.84-7.75 (4H, m), 7.61 (2H, d  $^3J = 7.4$  Hz), 7.52-7.42 (8H, m) 7.41-7.30 (14H, m), 2.99-2.70 (12H, m), 1.33-1.05 (72H, m). **<sup>13</sup>C NMR** (151 MHz, chloroform-*d*, 300 K):  $\delta$  163.7, 163.6, 145.9, 145.8, 145.7, 137.5, 136.9, 136.6, 136.0, 135.5, 134.7, 132.7, 131.8, 130.8, 130.5, 130.1, 129.7, 128.8, 128.1, 127.8, 127.4, 127.3, 126.6, 125.4, 124.3, 124.1, 124.0, 123.9, 122.5, 121.8, 121.7, 117.1, 116.8, 116.7, 116.2, 114.2, 113.3, 107.2, 77.0, 31.9, 29.7, 29.7, 29.6, 29.4, 29.3, 29.3, 29.2, 29.2, 24.1, 24.1, 24.0, 22.7. **HRMS** (MALDI-TOF): *m/z*: [M + Na]<sup>+</sup> Calcd for C<sub>175</sub>H<sub>126</sub>N<sub>12</sub>O<sub>13</sub>: 2609.9510; Found 2609.9719. **UV-vis** (dichloromethane, 300 K)  $\lambda$  [nm] ( $\epsilon$  in M<sup>-1</sup> cm<sup>-1</sup>): 330 (177 400) 370 (162 600) 570 (101 900) 615 (96 100).



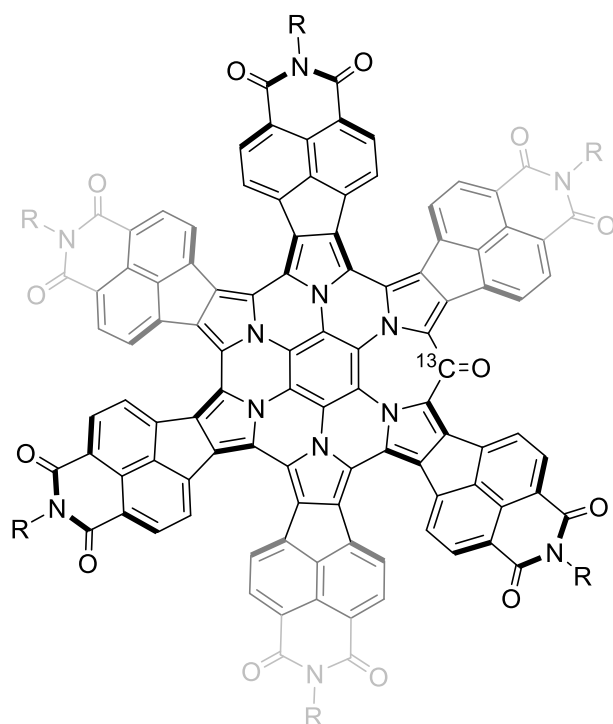

**Compound (7-c).** Compound **7-c** was prepared using **4<sub>2</sub>-c<sub>2</sub>** (6.2 mg, 1  $\mu$ mol) as the starting material according to the procedure given for **7**, to yield the product as a green solid (5 mg, 79%). **<sup>1</sup>H NMR** (600 MHz, chloroform-*d*<sub>1</sub>, 300 K):  $\delta$  9.51 (2H, d,  $^3J = 7.2$  Hz), 8.91 (2H, d,  $^3J = 7.2$  Hz), 8.83-8.72 (6H, m), 8.69 (2H, d,  $^3J = 7.2$  Hz), 8.65 (2H, d,  $^3J = 7.4$  Hz), 7.84-7.75 (4H, m), 7.61 (2H, d  $^3J = 7.4$  Hz), 7.53-7.42 (8H, m) 7.41-7.30 (14H, m), 2.99-2.70 (12H, m), 1.33-1.05 (72H, m). **<sup>13</sup>C NMR** (151 MHz, chloroform-*d*, 300 K):  $\delta$  163.7, 163.6, 145.9, 145.8, 145.7, 137.5, 136.9, 136.6, 136.0, 135.5, 134.7, 132.7, 131.8, 130.8, 130.5, 130.1, 129.7, 128.8, 128.1, 127.8, 127.4, 127.3, 126.6, 125.4, 124.3, 124.1, 124.0, 123.9, 122.5, 121.8, 121.7, 117.1, 116.8, 116.7, 116.2, 114.2, 113.3, 107.2, 77.0, 31.9, 29.7, 29.7, 29.6, 29.4, 29.3, 29.3, 29.2, 29.2, 24.1, 24.1, 24.0, 22.7.

## Additional Figures

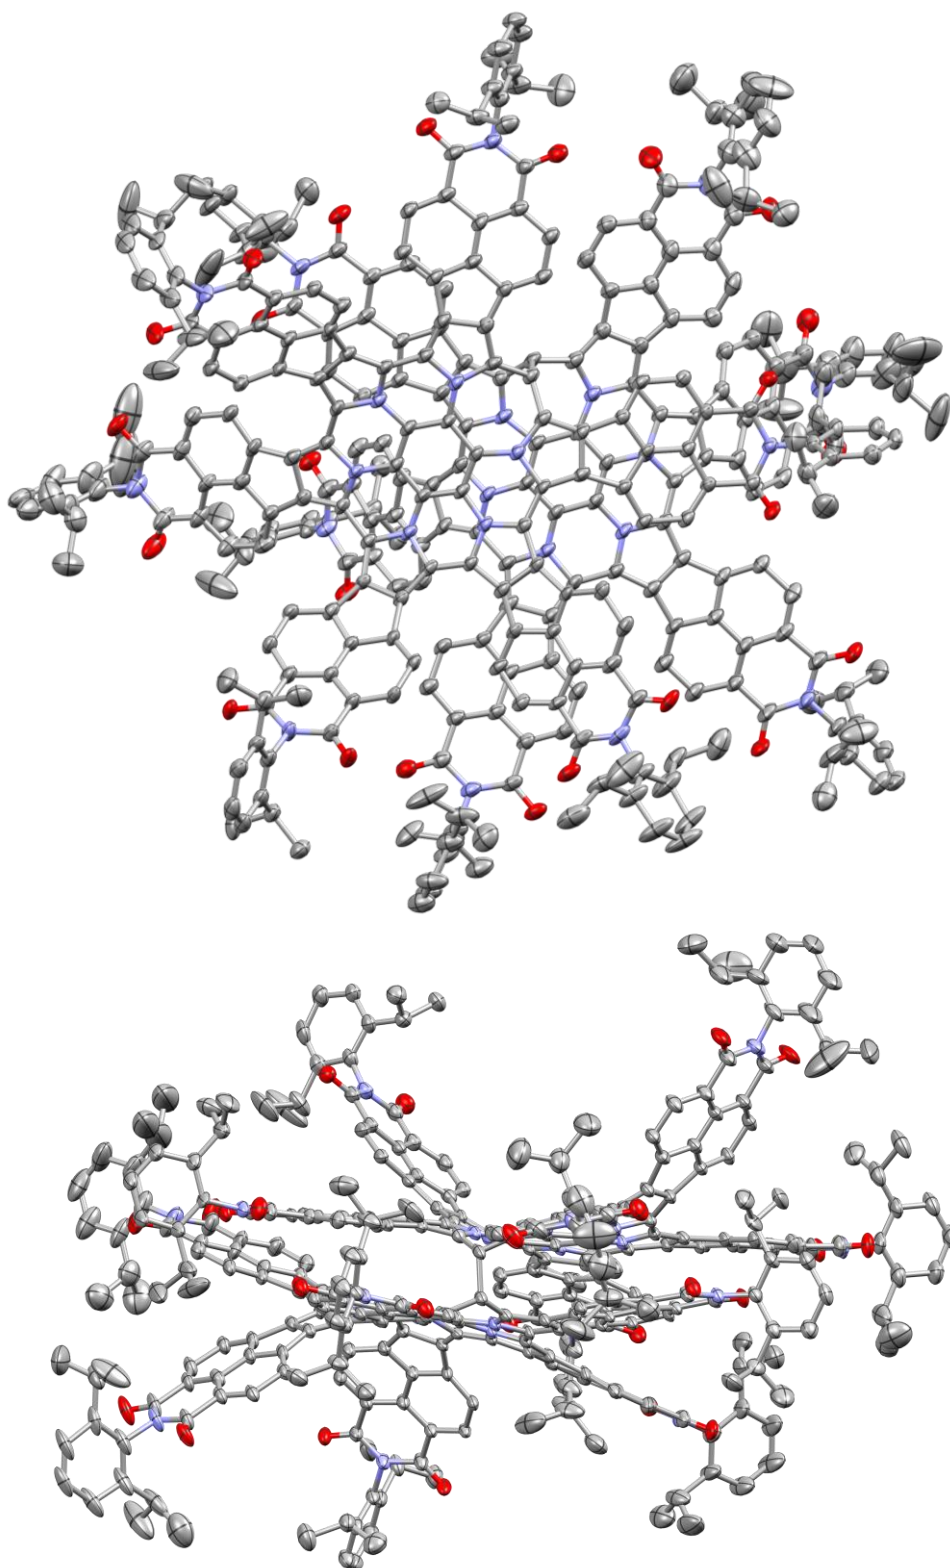

**Figure S1.** X-ray crystal structure of  $4_2 \cdot 2(C_7H_8) \cdot 43(CH_3OH) \cdot 0.65(CH_2Cl_2)$ . Hydrogens and solvents were omitted for clarity.

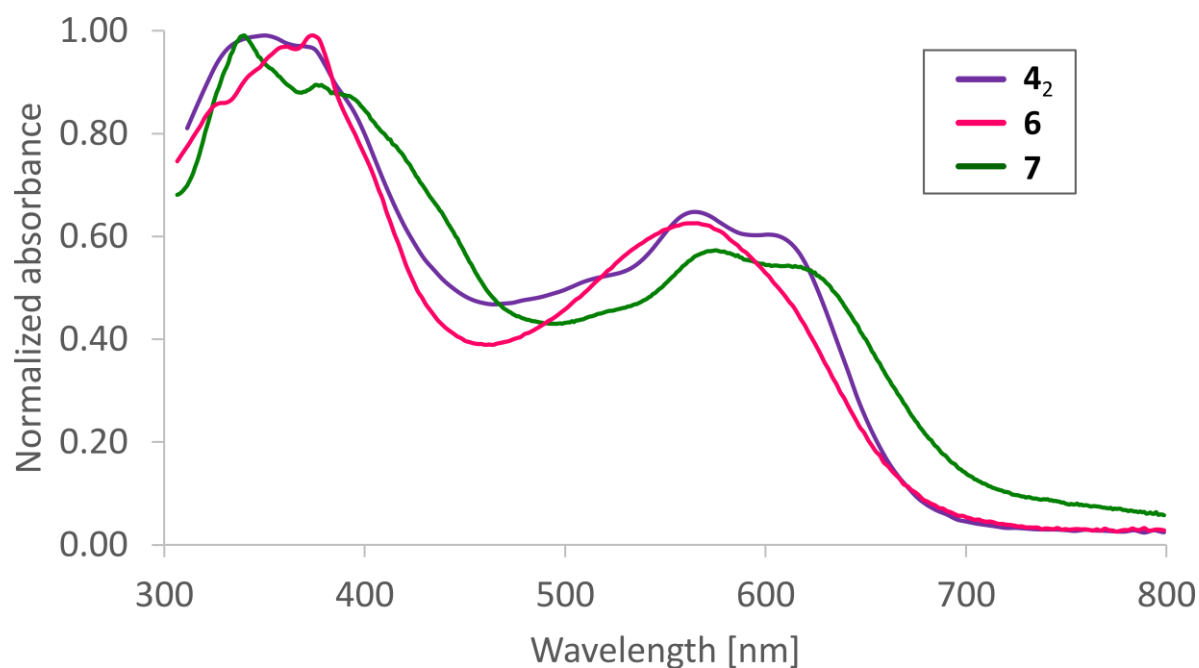

**Figure S2.** UV-vis absorption spectra of  $4_2$  (violet), **6** (pink), and **7** (green) in dichloromethane, measured at 293 K.

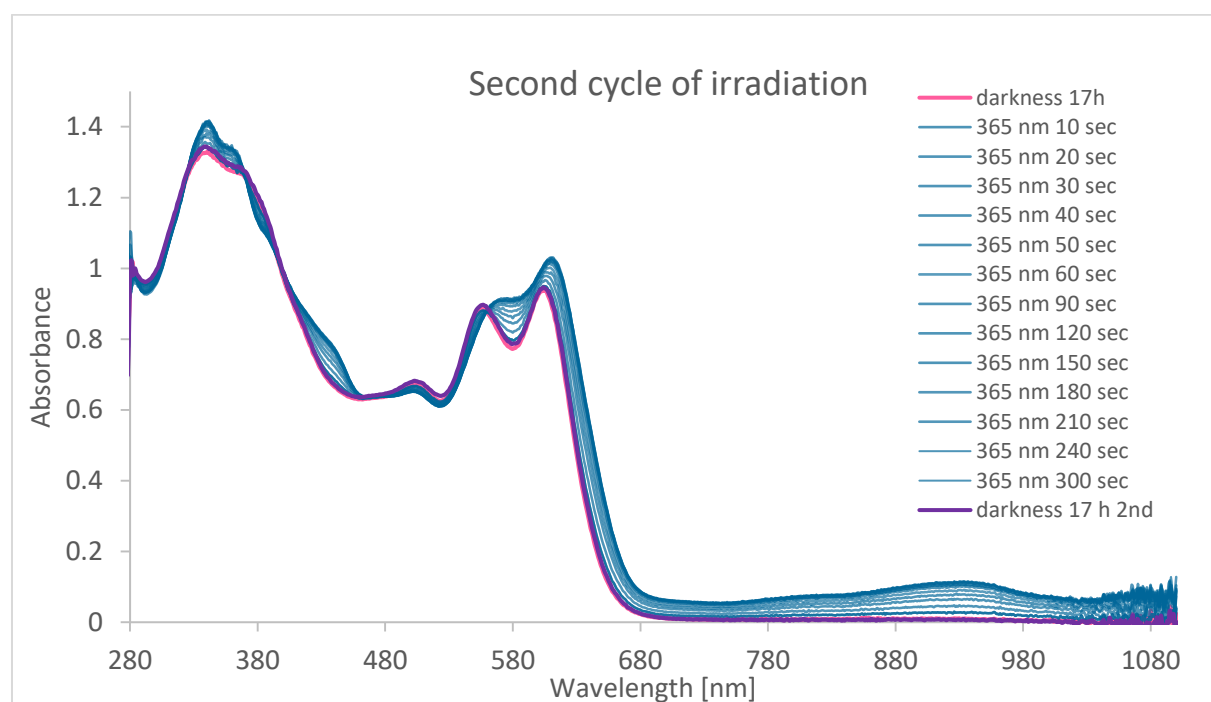

**Figure S3.** Changes of UV-vis absorption spectra observed for  $4_2$  during the second cycle of irradiation with a UV lamp (365 nm, in toluene).

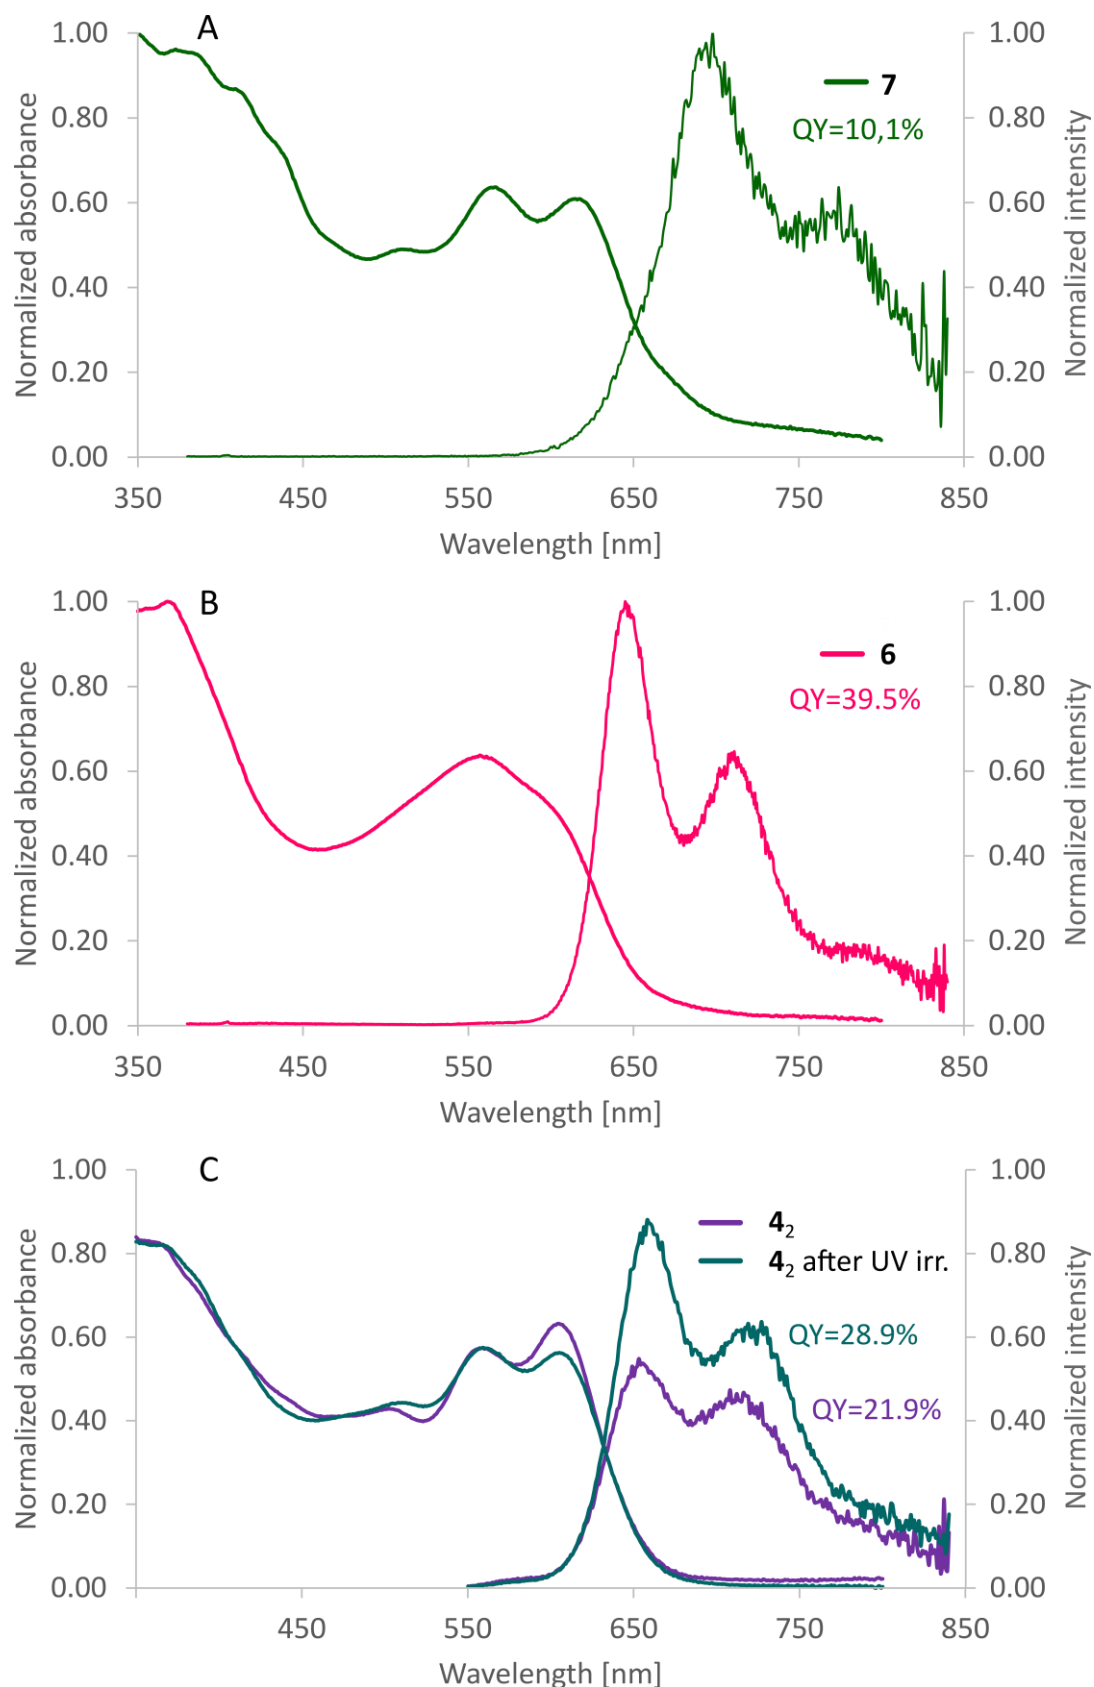

**Figure S4.** Absorption and emission spectra (toluene, 293 K, excitation at 360 nm). Top: spectra of **7** (A) and **6** (B). Bottom (C): for **4<sub>2</sub>** measured before (violet) and after (green) irradiation with UV lamp (at 365 nm) in the presence of atmospheric oxygen: an increase of emission intensity was observed.

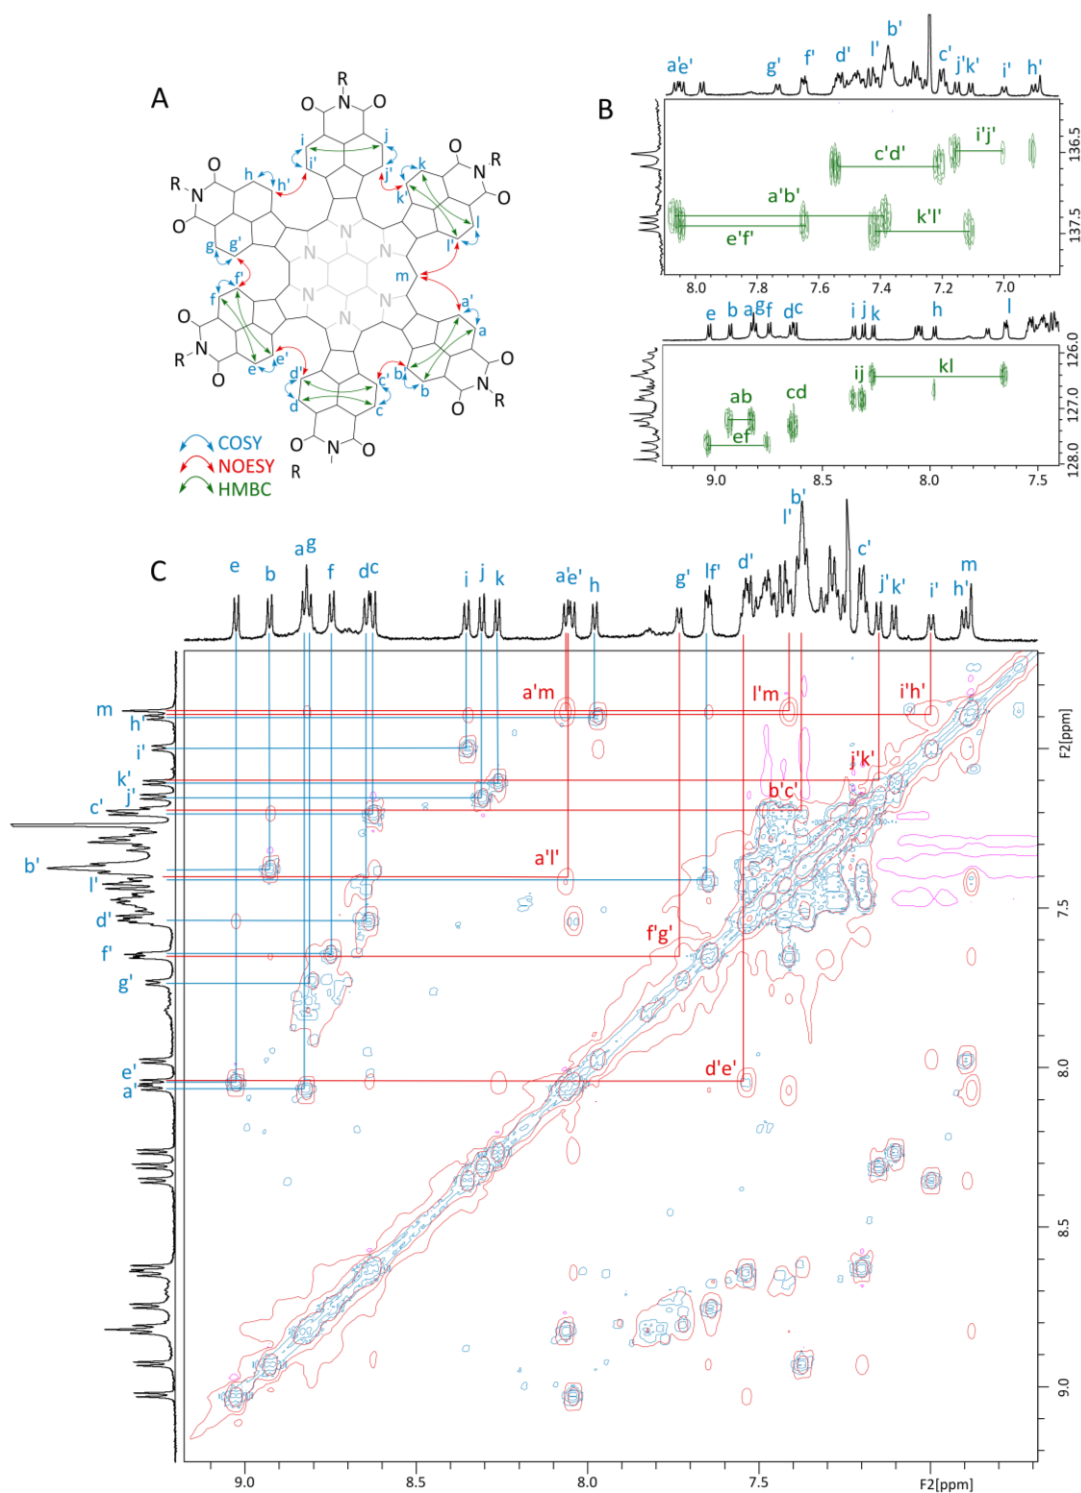

**Figure S5.** (A) Partial assignment of the  $^1\text{H}$  NMR spectrum of  $\mathbf{4}_2$  (chloroform- $d$ , 300 K, based on COSY, NOESY, HSQC and HMBC correlations). Blue lines correspond to COSY correlations; red lines correspond to selected EXSY correlations; green lines correspond to HMBC correlations. (B) Selected regions of HMBC correlation spectrum of  $\mathbf{4}_2$ . (C) Overlaid COSY (blue/green) and NOESY (red/pink) correlation spectra recorded for  $\mathbf{4}_2$ . Blue lines show the COSY correlations, red lines show selected NOESY correlations.

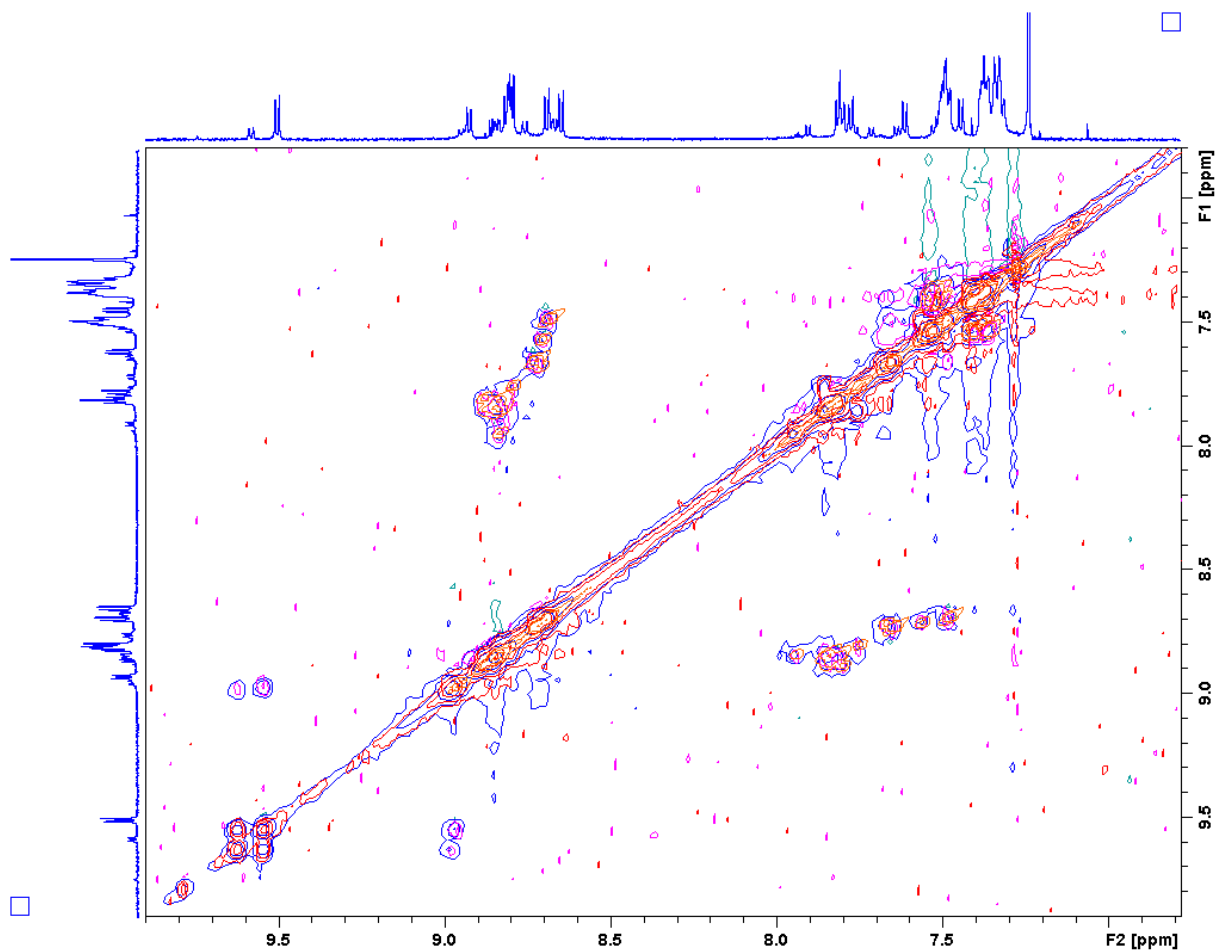

**Figure S6.** Overlaid selected regions of NOESY (blue/green for positive/negative contours), ROESY (red/pink for positive/negative contours) and COSY (orange) correlation spectra for **7**. EXSY crosspeaks are observable between signals of the two conformers.

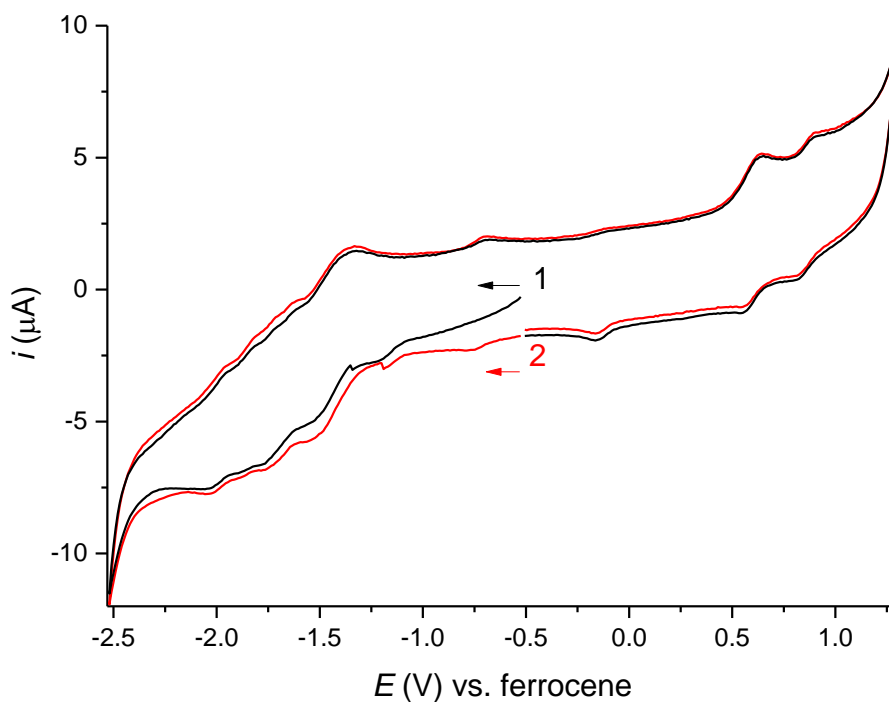

**Figure S7.** Two consecutive cyclic voltammograms of  $4_2$  were measured under following conditions:  $[\text{BuN}_4]\text{PF}_6$  in dichloromethane, scan rate:  $100 \text{ mV s}^{-1}$ ; the voltammograms were referenced with ferrocene/ferrocenium couple as an internal standard.

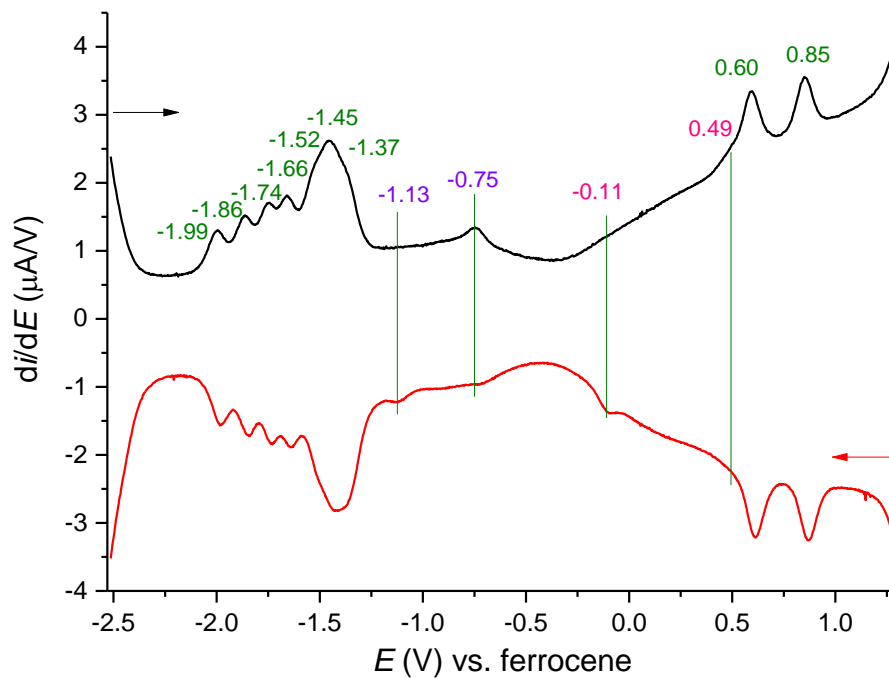

**Figure S8.** Differential pulse voltammograms of  $4_2$  in dichloromethane. Directions of the potential scans are indicated with arrows. The number associated with the cathodic scan (black trace) are peak potentials in volts.

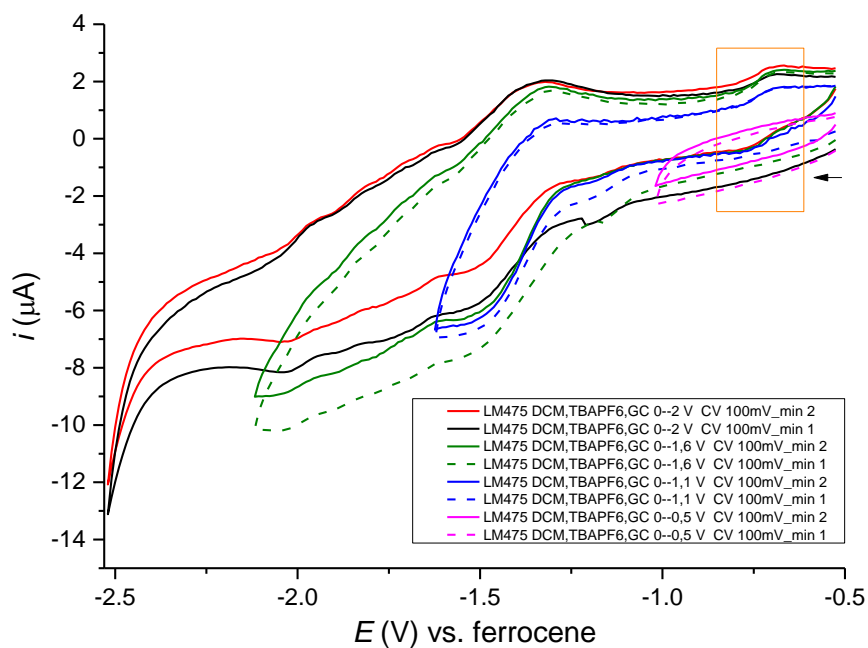

**Figure S9.** A series of cyclic voltammograms for  $4_2$  recorded within different reduction potential limits. The orange box indicates a reversible couple at -0.75 V that can be observed after cathodic scan down to -1.6 V.

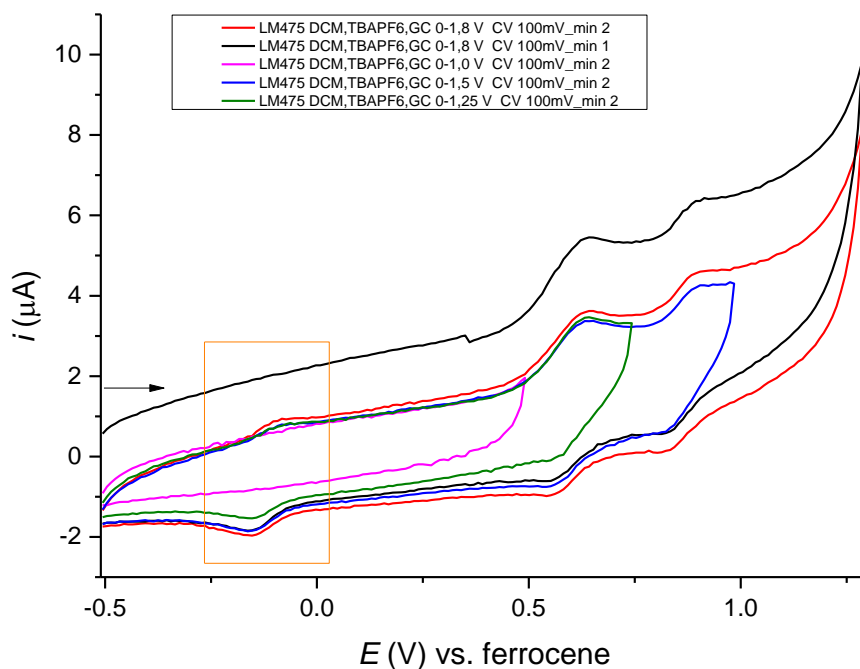

**Figure S10.** A series of cyclic voltammograms recorded for  $4_2$  within different oxidation potential limits. The orange box indicates a reversible couple at -0.11 V that can be observed after anodic scan up to 0.6 V.



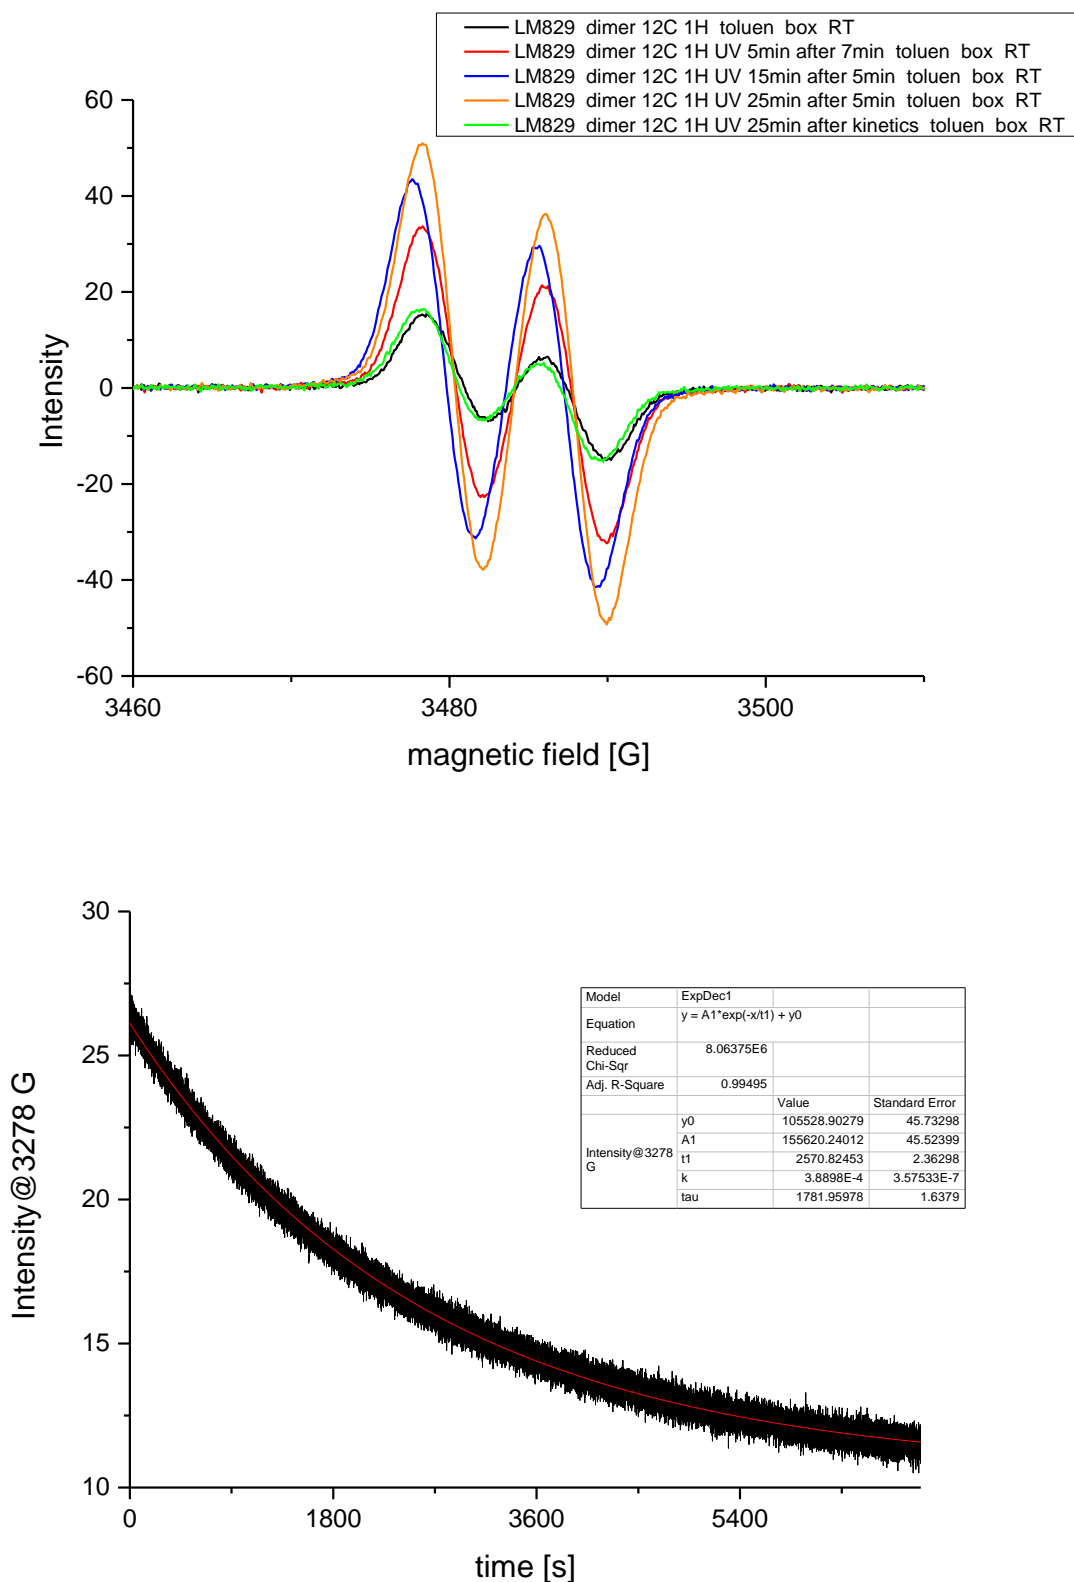

**Figure S11.** ESR spectra (top) of **4<sub>2</sub>**. Bottom: time depended spectrum of intensity at 3275 G (solvent: toluene). The increase of amount of radical after irradiation of the solution with UV (365 nm) and the following decay of radical after protecting the sample from light is observed.

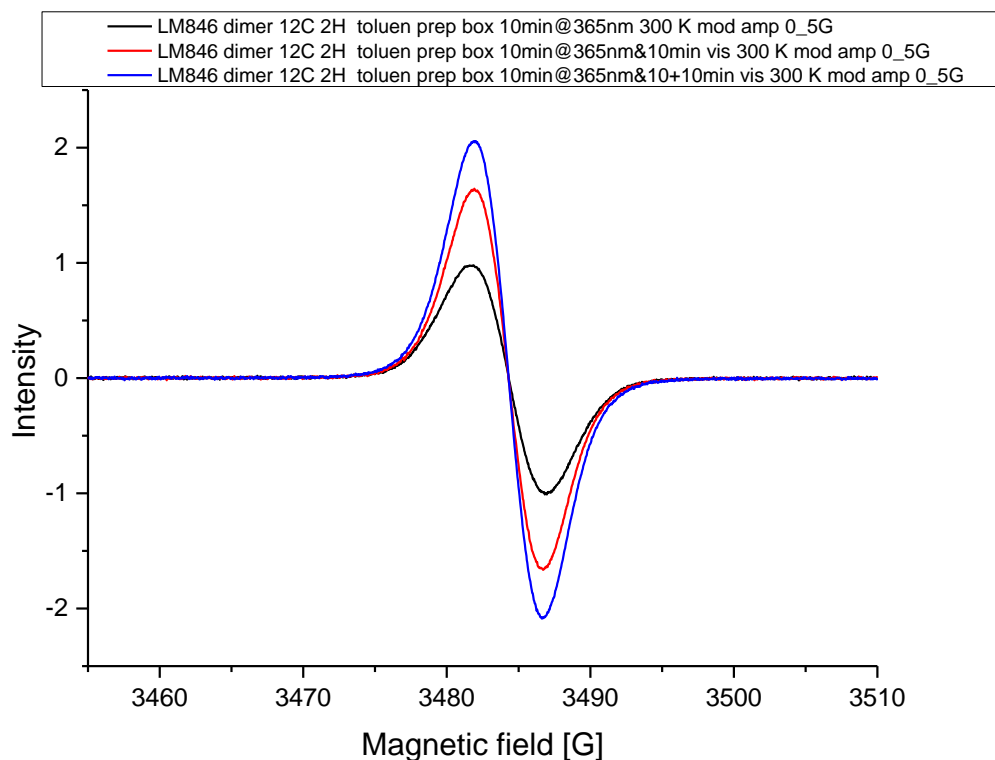

**Figure S12.** ESR spectra of irradiated toluene solutions of  $4_2-d_2$ : black line – 10 min irradiation at 365 nm; red line – irradiated for additional 10 min under LED lamp; blue line – irradiated for 10 min under UV light and 20 min LED lamp. The increase of radical is observed after treatment of dimer in toluene solution with different sources of light.

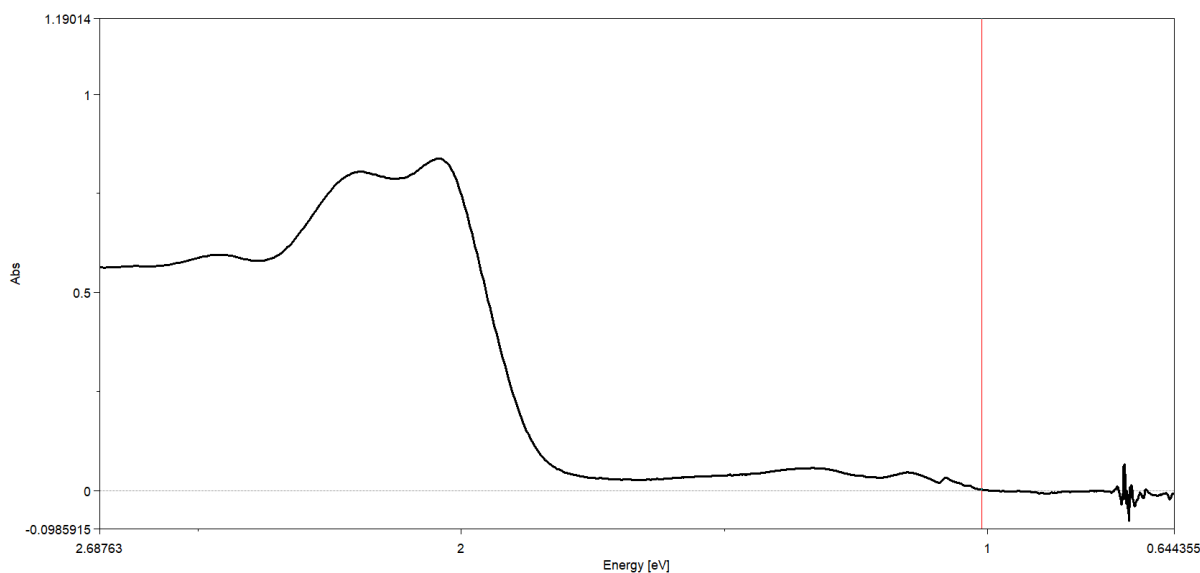

**Figure S13.** Electronic spectrum of  $4^*$  shown in energy units. The optical bandgap is indicated.

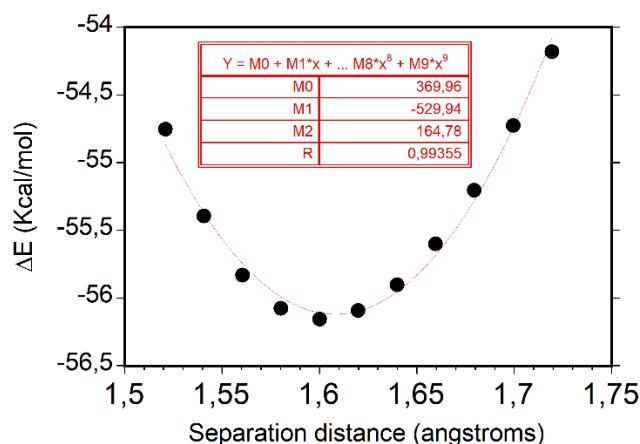

**Figure S14.** Fitting the  $\Delta E_{\text{SCC}}$  energy (GFN2-xTB) of the  $S_0\text{-}\sigma\text{-4}_2$  PES with a parabolic function. It is assumed that in the vicinity of the  $S_0\text{-}\sigma\text{-4}_2$  minimum, the dominant energy contribution is associated with stretching of the C–C bond. Subject to this assumption, the behavior of  $\Delta E_{\text{SCC}}$  in the proximity of the equilibrium distance will follow harmonic behavior and can be fitted with a parabola, with the factor of the squared term corresponding to half the force constant of the C–C bond. The calculation yields a value of  $2.29 \text{ mdyn}\cdot\text{\AA}^{-1}$  (this value increases up to  $2.70 \text{ mdyn}\cdot\text{\AA}^{-1}$  when a smaller number of points is used for fitting).

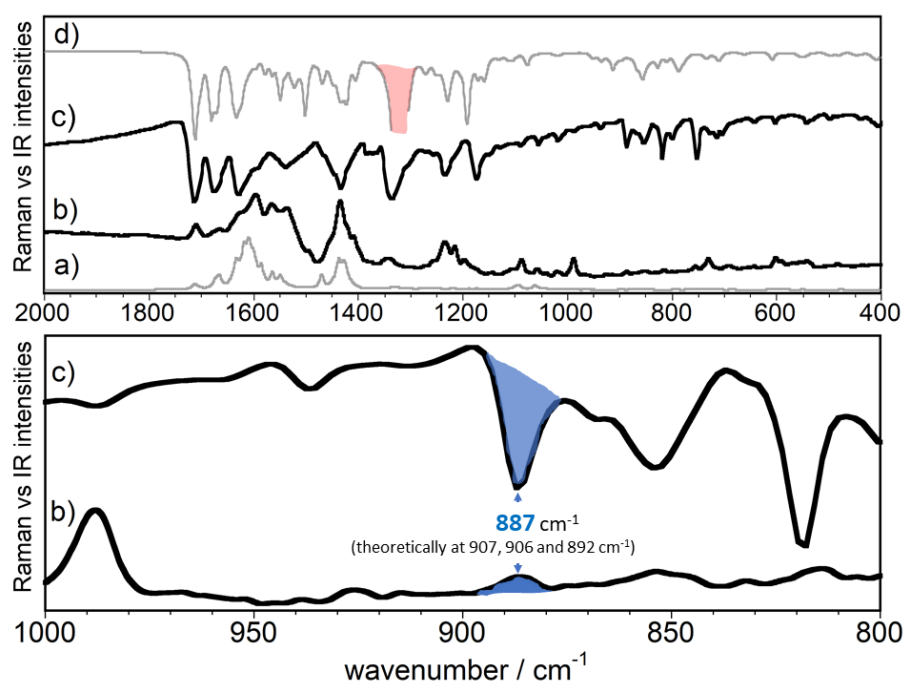

**Figure S15.** Top: a) Theoretical Raman spectrum of  $\mathbf{4}_2$  ( $\omega\text{B97XD/3-21G}$ ); b) 532 nm excitation Raman spectra of  $\mathbf{4}_2$ , in the solid state at 80 K; c) Fourier-transform infrared spectrum of  $\mathbf{4}_2$  in solid state at room temperature; and d) theoretical infrared spectrum of  $\mathbf{4}_2$  ( $\omega\text{B97XD/3-21G}$ ). The red shaded highlights the most intense theoretical infrared band which has been partially suppressed to clearly visualize the whole spectrum (see ESI for the complete spectrum and details). Bottom: b) and c) such as the top panel in the inter-fragment C–C stretching mode wavenumber region. The bands shaded in blue correspond to those with associated vibrational modes containing the largest contributions of the inter-fragment C–C stretching mode.

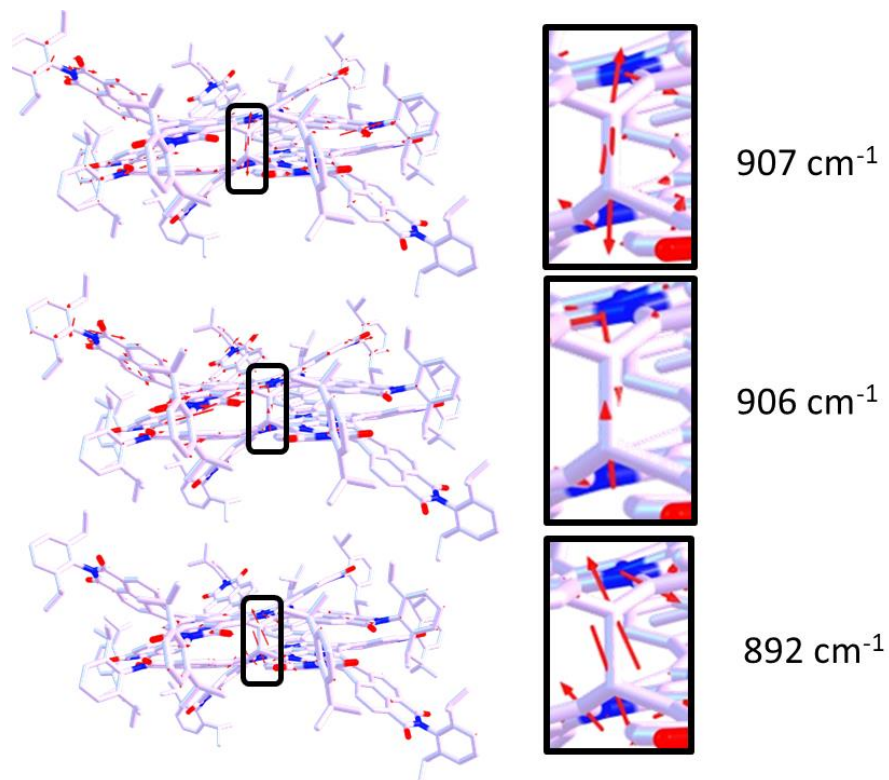

**Figure S16.** Calculated vibrational eigenvectors associated with the Raman and infrared bands of  $4_2$  at 907, 906 and 892  $\text{cm}^{-1}$  ( $\omega\text{B97XD}/3\text{-}21\text{G}$ ).

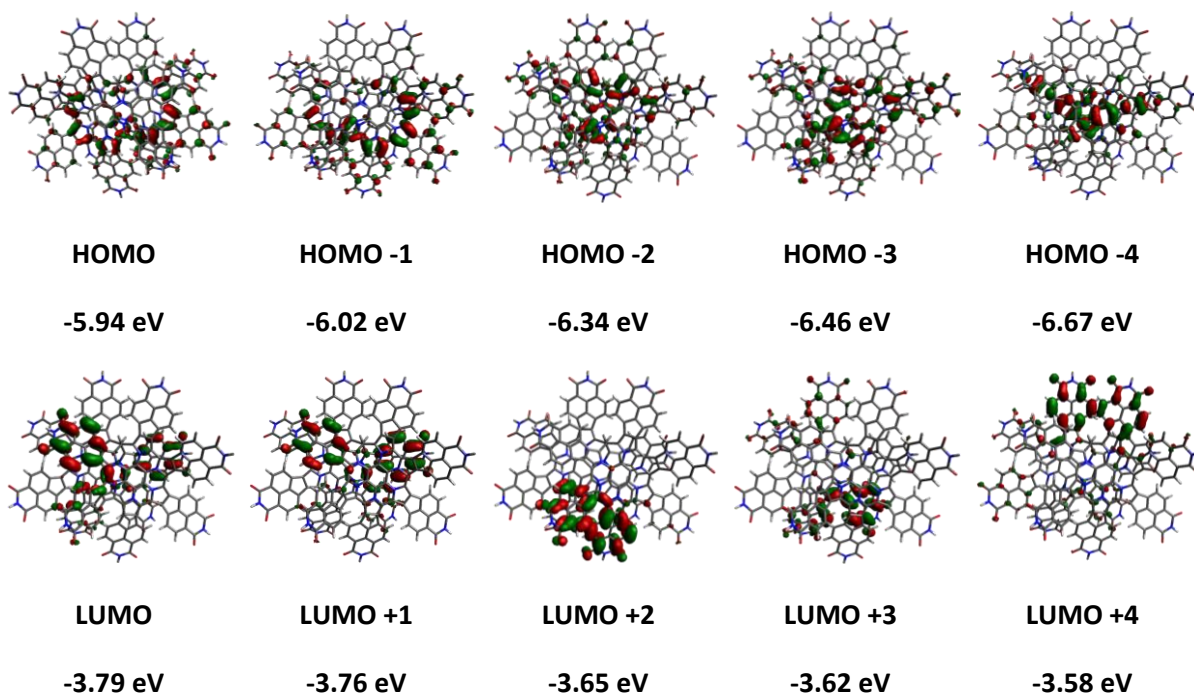

**Figure S17.** Frontier molecular orbitals (isovalue = 0.02) and orbital energies of  $4_2$ .

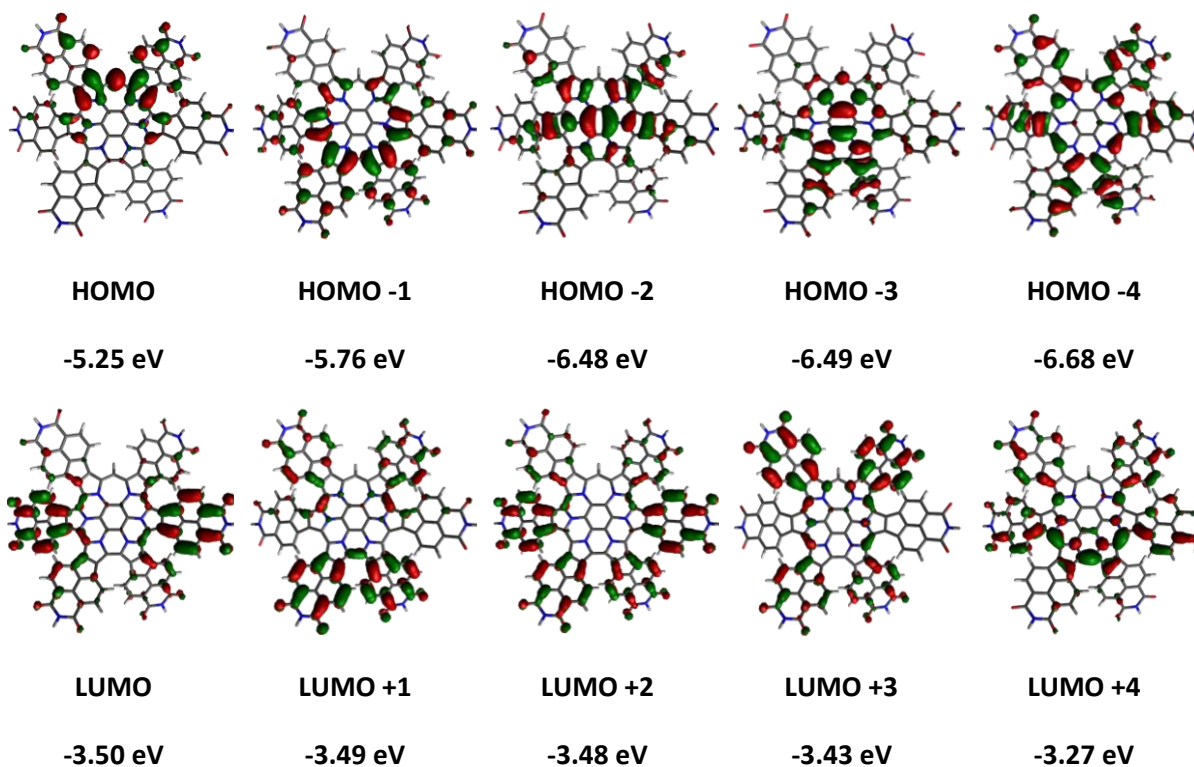

**Figure S18.** Frontier molecular orbitals (isovalue = 0.02) and orbital energies of  $4^*$ .

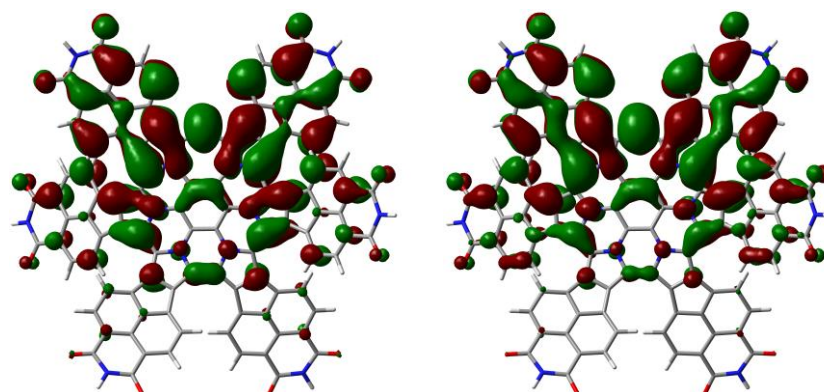

| Nr orbital | SOMO<br>$\alpha$ -orbital<br>energy | $\beta$ -LUMO<br>$\beta$ -orbital<br>energy |
|------------|-------------------------------------|---------------------------------------------|
| 418        | LUMO +2<br>-3.48 eV                 | LUMO +3<br>-3.42 eV                         |
| 417        | LUMO +1<br>-3.49 eV                 | LUMO +2<br>-3.48 eV                         |
| 416        | LUMO<br>-3.50 eV                    | LUMO +1<br>-3.48 eV                         |
| 415        | <b>SOMO</b><br><b>-5.25 eV</b>      | <b>LUMO</b><br><b>-4.12 eV</b>              |
| 414        | HOMO -1<br>-5.75 eV                 | HOMO<br>-5.72 eV                            |
| 413        | HOMO -2<br>-6.48 eV                 | HOMO -1<br>-6.41 eV                         |
| 412        | HOMO -3<br>-6.49 eV                 | HOMO -2<br>-6.45 eV                         |

**Figure S19.** Frontier molecular  $\alpha$  and  $\beta$  orbitals (isovalue = 0.015) and orbital energies of **4<sup>\*</sup>**.

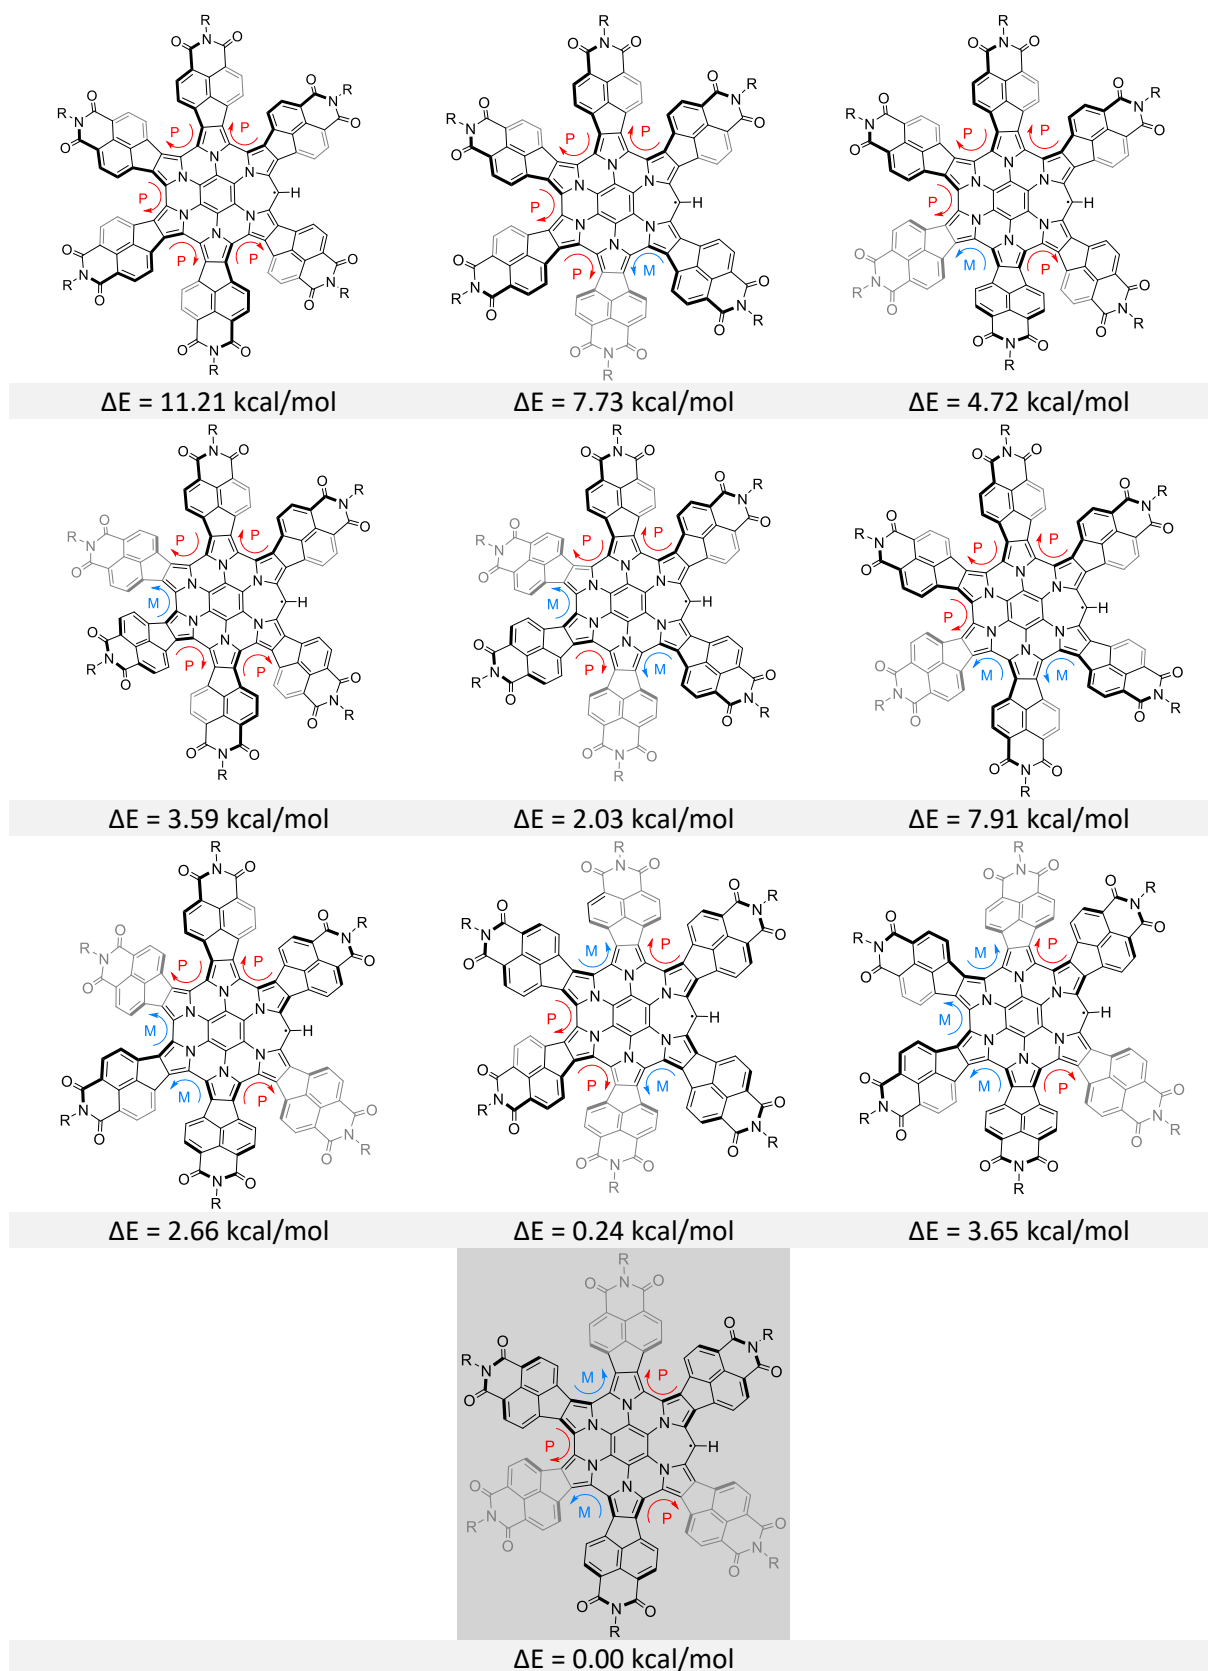

**Figure S20.** Conformers of **4\*** ( $\omega$ B97XD/6-31g(d,p)). Energies are given relative to the most stable conformation.

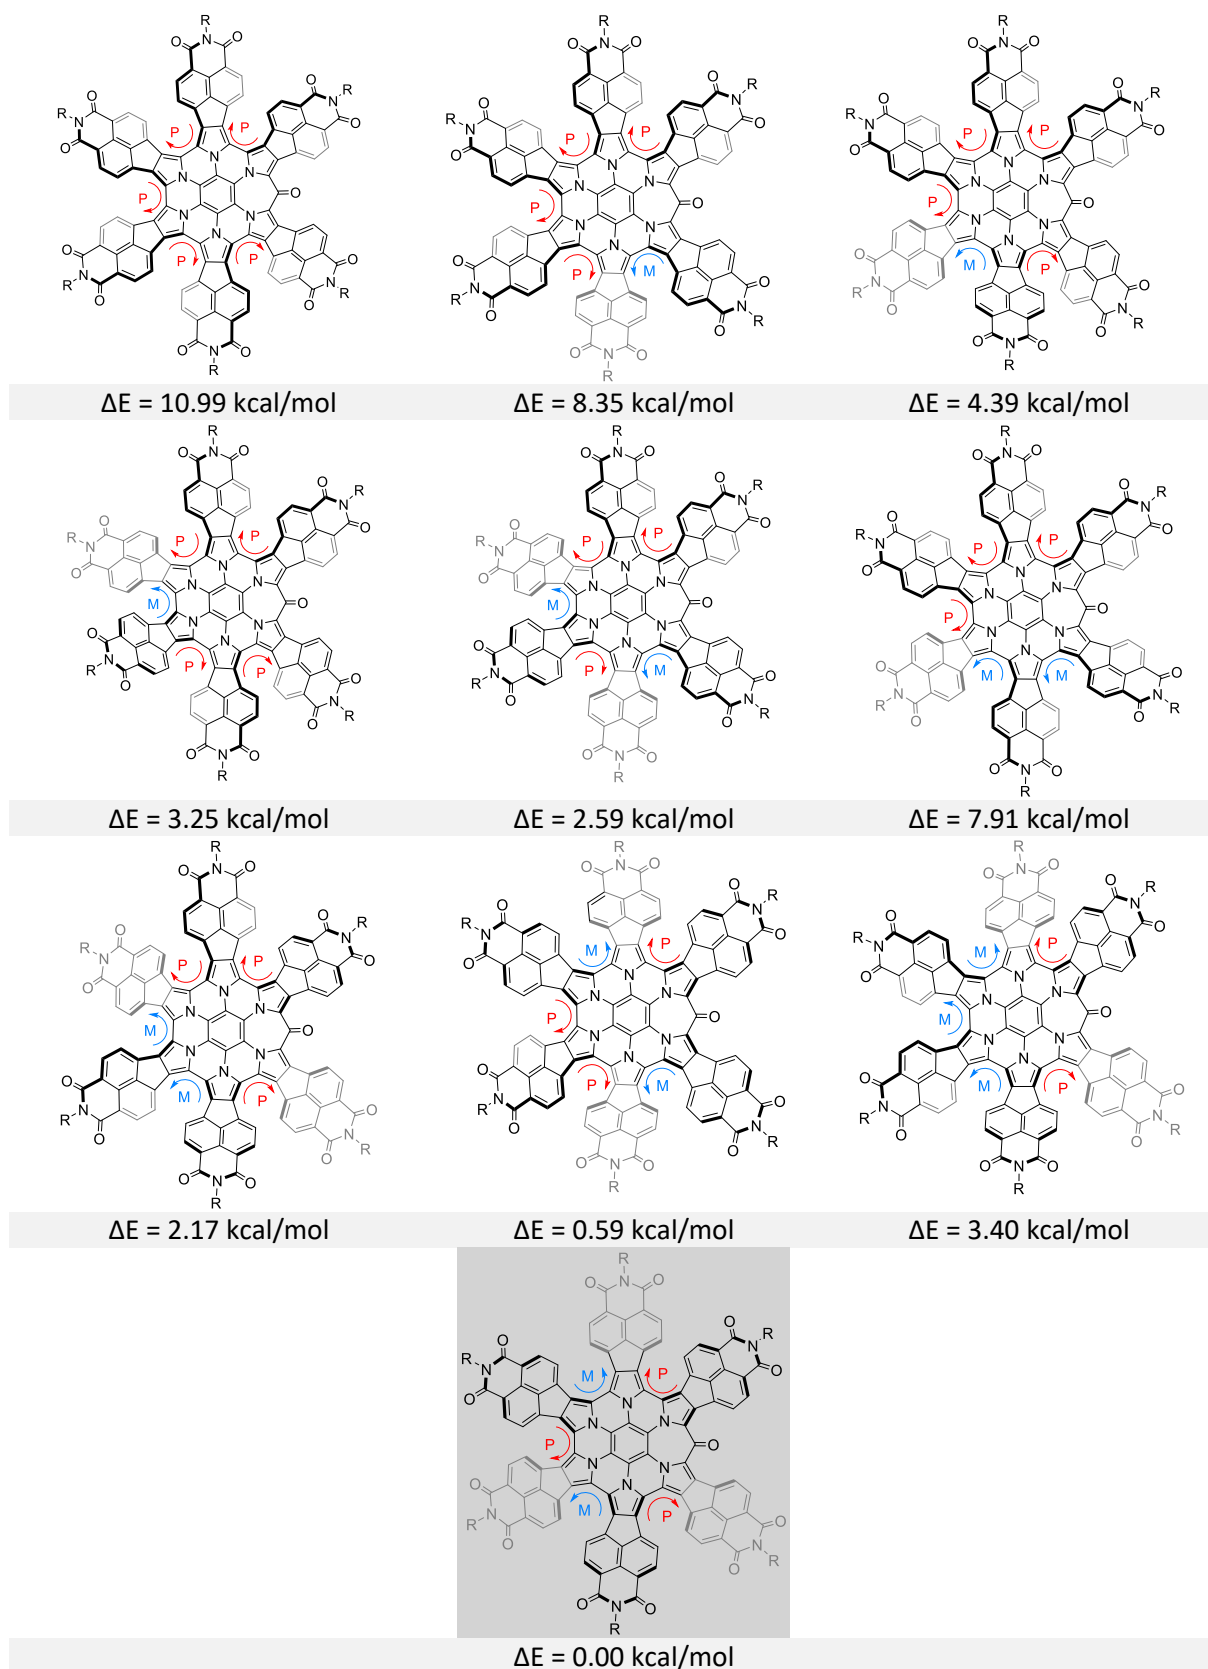

**Figure S21.** Conformers of **7** ( $\omega$ B97XD/6-31g(d,p)). Energies are given relative to the most stable conformation.



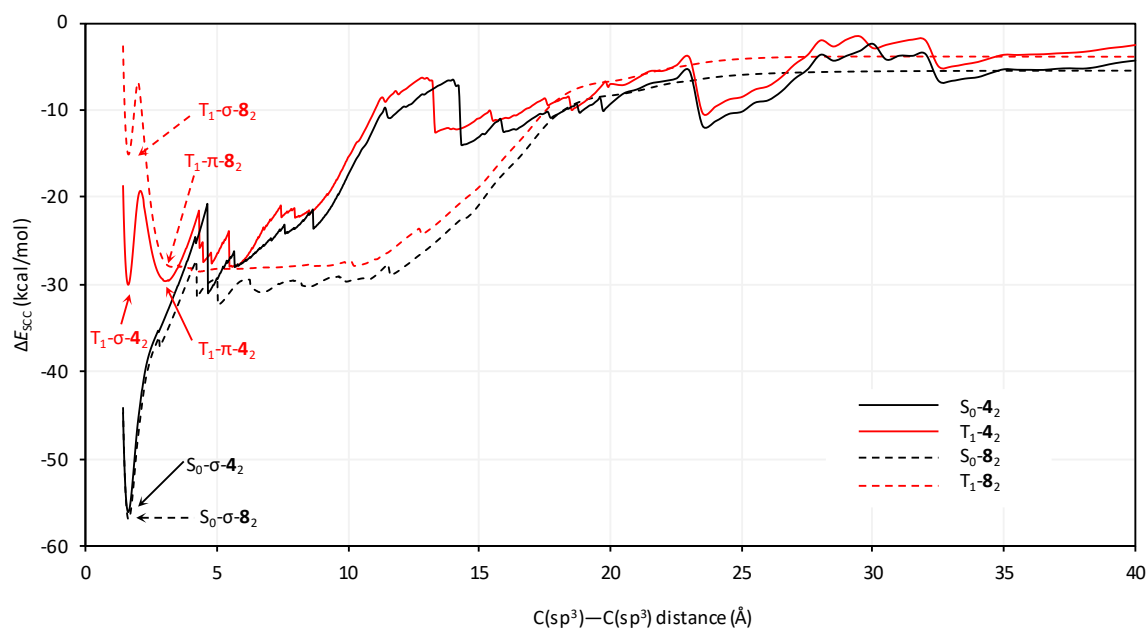

**Figure S22.** GFN2-xTB relaxed potential energy scans for **4<sub>2</sub>** and **8<sub>2</sub>** performed along the C(sp<sup>3</sup>)-C(sp<sup>3</sup>) bond length coordinate on singlet and triplet hypersurfaces. Energies are given relative to **4<sup>\*</sup>** and **8<sup>\*</sup>**, respectively.

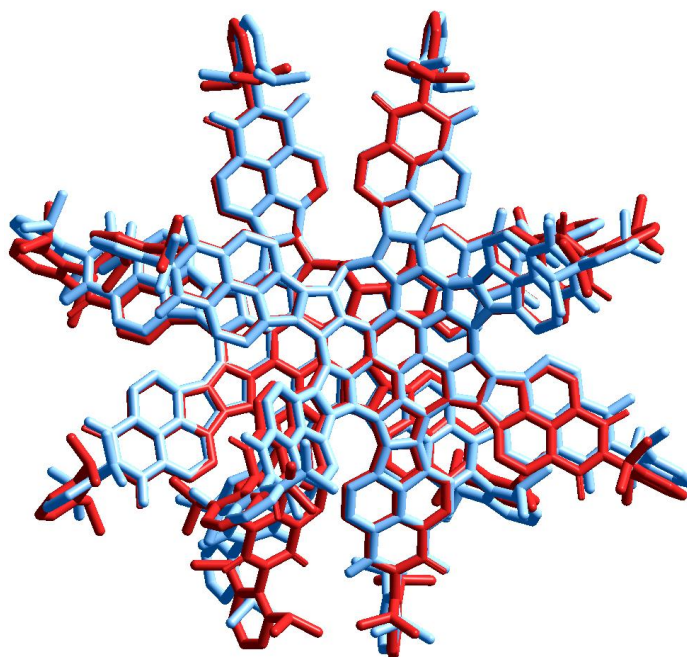

**Figure S23.** Comparison of the experimental (XRD, blue), and calculated (GFN2-xTB, red) geometries of **4<sub>2</sub>**.

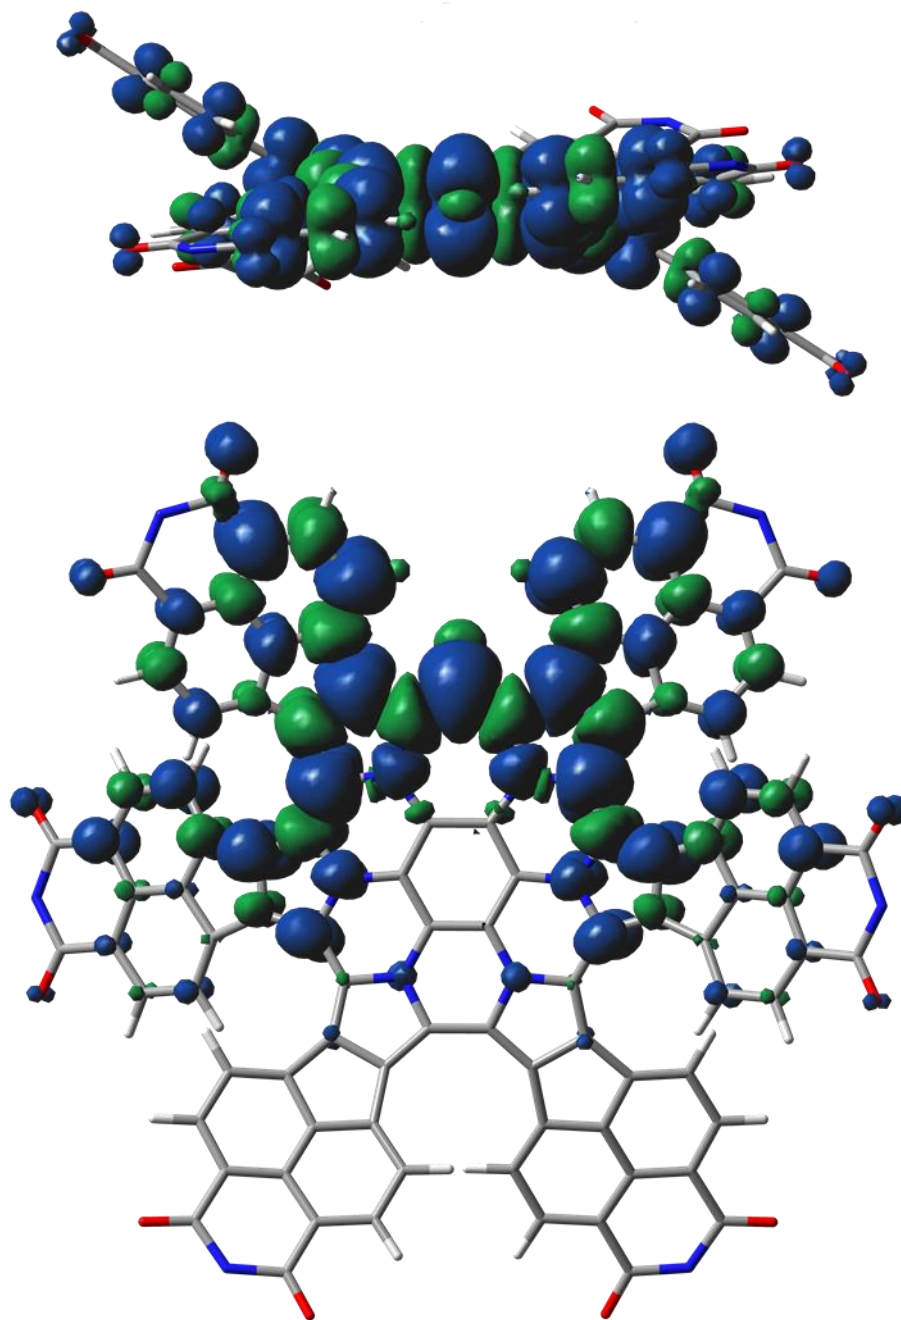

**Figure S24.** Spin density of monoradical **4**<sup>\*</sup> ( $\omega$ B97XD/6-31g(d,p), dipp substituents are omitted for clarity).

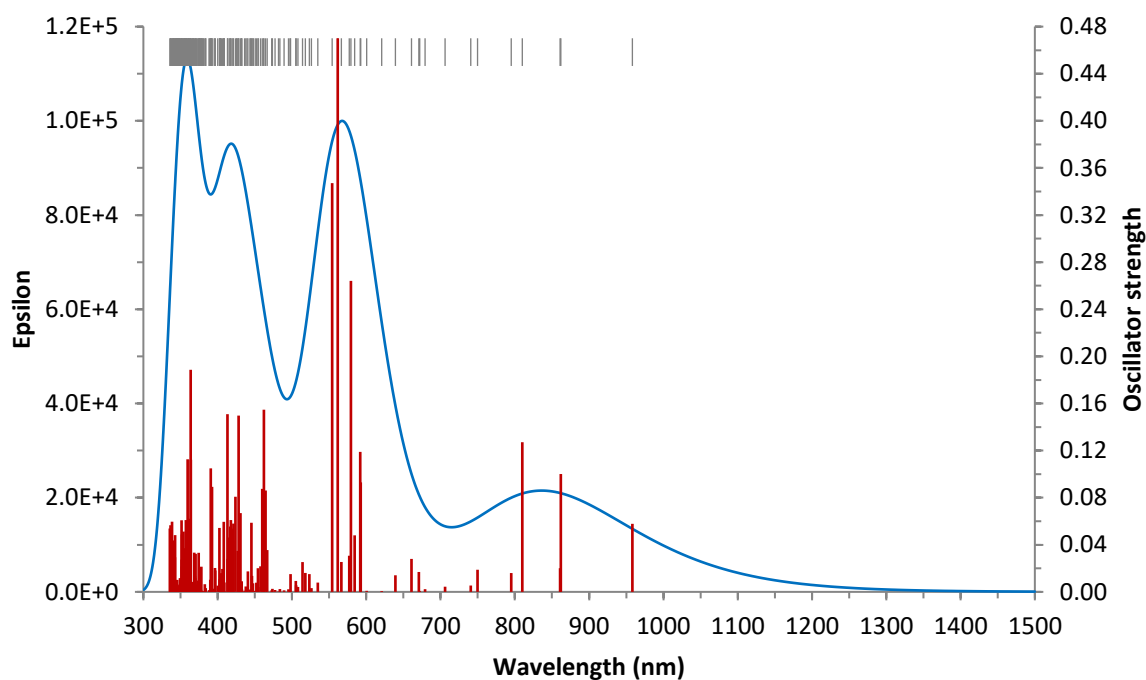

**Figure S25.** TDA-DFT spectra for **4\*** (B3LYP/6-31G(d,p)). Individual transitions are shown as red sticks. The blue envelope is a sum of Gaussian profiles with halfwidths of 1500 cm<sup>-1</sup>.

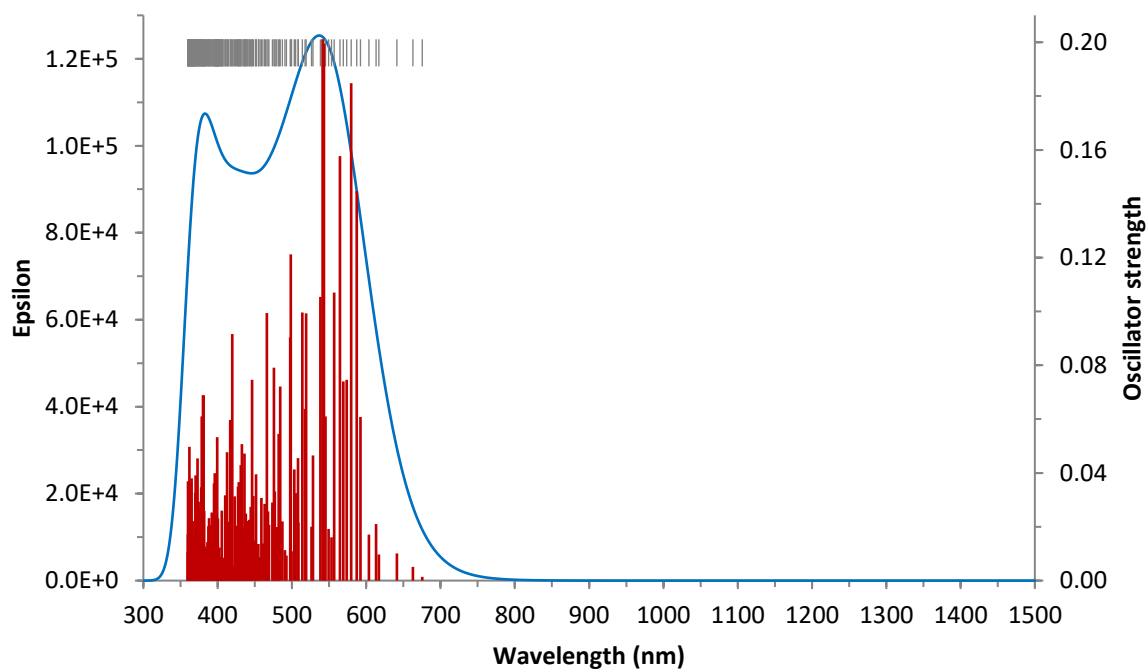

**Figure S26.** TDA-DFT spectra for **4<sub>2</sub>** (B3LYP/3-21g). Individual transitions are shown as red sticks. The blue envelope is a sum of Gaussian profiles with halfwidths of 1500 cm<sup>-1</sup>.

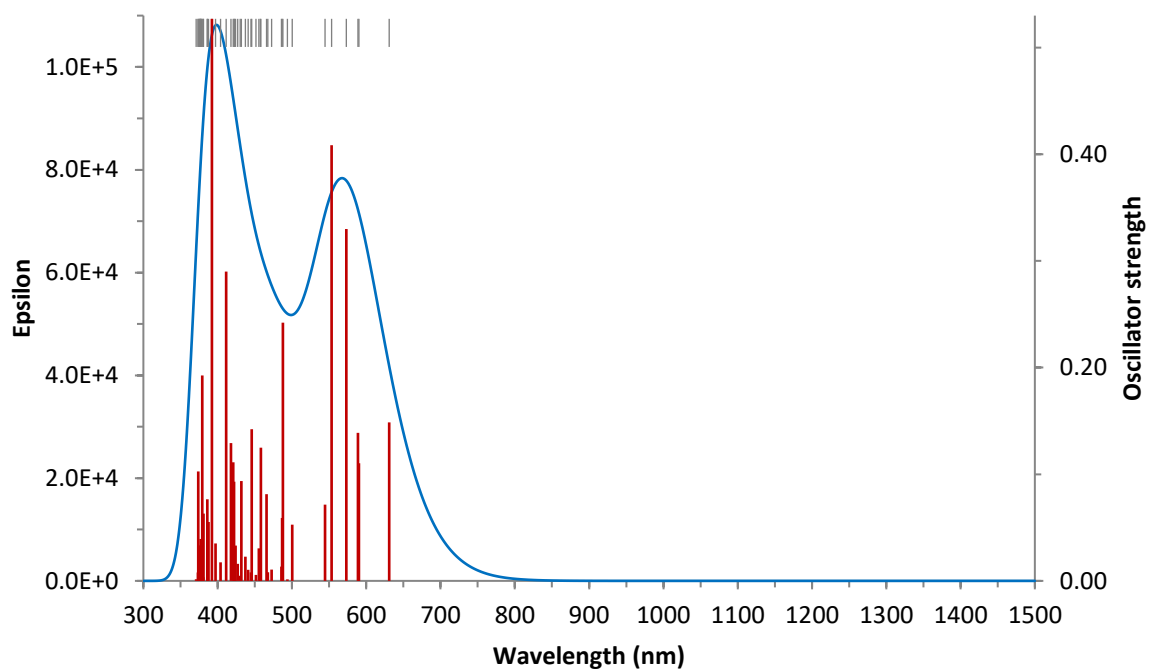

**Figure S27.** TDA-DFT spectra for **7** (B3LYP/6-31G(d,p)). Individual transitions are shown as red sticks. The blue envelope is a sum of Gaussian profiles with halfwidths of 1500 cm<sup>-1</sup>.

## Additional Tables

**Table S1.** Energetics of dimerization for **8**<sub>2</sub>.

| Energy <sup>[a]</sup><br>(kcal/mol)  | <b>S</b> <sub>0</sub> - <b>σ</b> - <b>8</b> <sub>2</sub> |                               | <b>T</b> <sub>1</sub> - <b>σ</b> - <b>8</b> <sub>2</sub> |       | <b>T</b> <sub>1</sub> - <b>π</b> - <b>8</b> <sub>2</sub> |
|--------------------------------------|----------------------------------------------------------|-------------------------------|----------------------------------------------------------|-------|----------------------------------------------------------|
|                                      | total                                                    | $\Delta E_X^{\text{def [b]}}$ | $\Delta E_X^{\text{int [b]}}$                            | total | total                                                    |
| $\Delta E_{\text{SCC}}$              | -56.8                                                    | 40.8                          | -97.6                                                    | -14.5 | -27.3                                                    |
| $\Delta E_{\text{disp}}$             | -40.5                                                    | -0.1                          | -40.4                                                    | -44.0 | -42.6                                                    |
| $\Delta E_{\text{solv}}$             | 7.3                                                      | -0.2                          | 7.5                                                      | 8.3   | 8.2                                                      |
| $\Delta E_{\text{el}}$               | -23.6                                                    | 41.0                          | -64.6                                                    | 2.1   | 7.1                                                      |
| $\Delta G^{298}$                     | -33.4                                                    |                               |                                                          | 5.7   | -9.6                                                     |
| <b>C—C (Å)</b>                       | 1.608                                                    |                               |                                                          | 1.612 | 3.387                                                    |
| $\Delta E_{\text{DFT}}^{\text{[c]}}$ | -64.17                                                   |                               |                                                          |       |                                                          |
| $\Delta G^{298 \text{ [c]}}$         | -40.22                                                   |                               |                                                          |       |                                                          |
| <b>C—C (Å)</b>                       | 1.623                                                    |                               |                                                          |       |                                                          |

[a] GFN<sub>2</sub>-xTB energies (CH<sub>2</sub>Cl<sub>2</sub> solvation) relative to **8**<sup>\*</sup>.  $\Delta E_{\text{el}} = \Delta E_{\text{SCC}} - \Delta E_{\text{solv}} - \Delta E_{\text{disp}}$ , where  $\Delta E_{\text{SCC}}$ ,  $\Delta E_{\text{solv}}$ ,  $\Delta E_{\text{disp}}$  are respectively the self-consistent charge, solvation, and dispersion energy. [b] Deformation and interaction energy components; X corresponds respectively to SCC, disp, solv, and el.

**Table S2.** Computational details.

| Code <sup>[a]</sup>                   | level of theory <sup>[b]</sup> | E <sup>[c]</sup><br>a.u. | ZPV <sup>[d]</sup><br>a.u. | lowest<br>freq. <sup>[e]</sup><br>cm <sup>-1</sup> | G <sup>[f]</sup><br>a.u. |
|---------------------------------------|--------------------------------|--------------------------|----------------------------|----------------------------------------------------|--------------------------|
| <b>4</b> <sub>2</sub> S_sigma_4_2_DFT | ωB97XD/3-21G                   | -16514.657313            | 5.338014                   | 5.26                                               | -16509.674944            |
| S_sigma_4_2_xTB                       | GFN2                           | -1048.958800             | 5.058700                   | 4.59                                               | -1044.241641             |
| T_sigma_4_2_xTB                       | GFN2                           | -1048.917619             | 5.052335                   | 2.86                                               | -1044.207578             |
| T_pi_4_2_xTB                          | GFN2                           | -1048.916451             | 5.052340                   | 2.56                                               | -1044.208757             |
| <b>4</b> <sup>*</sup> 4(.)_DFT        | ωB97XD/6-31G(d,p)              | -8302.918368             | 2.628711                   | 4.33                                               | -8300.509367             |
| 4(.)_xTB                              | GFN2                           | -524.435060              | 2.523299                   | 4.02                                               | -522.104235              |
| <b>7</b> 7_DFT                        | ωB97XD/6-31G(d,p)              | -8377.534900             | 2.624053                   | 4.62                                               | -8375.129916             |
| <b>8</b> <sub>2</sub> S_sigma_8_2_xTB | GFN2                           | -181.669140              | 0.720064                   | 10.75                                              | -181.016787              |
| T_sigma_8_2_xTB                       | GFN2                           | -181.601689              | 0.714514                   | 19.35                                              | -180.954506              |
| T_pi_8_2_xTB                          | GFN2                           | -181.622041              | 0.713278                   | 7.33                                               | -180.978939              |
| <b>8</b> <sup>*</sup> 8(.)_xTB        | GFN2                           | -90.789276               | 0.355564                   | 46.06                                              | -90.481810               |

[a] Geometries available as \*.pdb files. [b] CH<sub>2</sub>Cl<sub>2</sub> solvation included in all xTB calculations. [c]  $E_{\text{SCC}}$  and  $E_{\text{SCF}}$  for xTB and DFT calculations, respectively. [d] zero-point vibrational energy. [e] lowest vibrational frequency. [f] Gibbs free energy.

**Table S3.** Electronic transitions calculated for 4<sup>o</sup> using the TDA/B3LYP/6-31G(d,p) level of theory.

| No. | Energy (cm <sup>-1</sup> ) | $\lambda$ (nm) | f <sup>[a]</sup> | Major excitations <sup>[b]</sup>                                                                                 |
|-----|----------------------------|----------------|------------------|------------------------------------------------------------------------------------------------------------------|
| 1   | 10436                      | 958.2          | 0.058            | HOMO(B)»LUMO(B) (87%)                                                                                            |
| 2   | 11602                      | 861.9          | 0.100            | HOMO(A)»L+2(A) (75%)                                                                                             |
| 3   | 11615                      | 860.9          | 0.020            | HOMO(A)»LUMO(A) (47%)<br>HOMO(A)»L+3(A) (39%)                                                                    |
| 4   | 12345                      | 810.0          | 0.127            | HOMO(A)»LUMO(A) (35%)<br>HOMO(A)»L+3(A) (41%)                                                                    |
| 5   | 12577                      | 795.1          | 0.016            | HOMO(A)»L+1(A) (57%)<br>HOMO(A)»L+4(A) (11%)                                                                     |
| 6   | 13337                      | 749.8          | 0.019            | H-1(A)»L+1(A) (36%)<br>HOMO(B)»L+1(B) (36%)                                                                      |
| 7   | 13501                      | 740.7          | 0.005            | HOMO(A)»L+1(A) (34%)<br>HOMO(A)»L+4(A) (47%)                                                                     |
| 8   | 14162                      | 706.1          | 0.004            | H-1(A)»LUMO(A) (21%)<br>HOMO(A)»L+4(A) (22%)<br>HOMO(B)»L+2(B) (22%)                                             |
| 9   | 14724                      | 679.2          | 0.002            | H-1(A)»L+2(A) (23%)<br>H-1(A)»L+4(A) (12%)<br>HOMO(A)»LUMO(A) (10%)<br>HOMO(B)»L+3(B) (25%)                      |
| 10  | 14882                      | 672.0          | 0.001            | H-1(B)»LUMO(B) (64%)                                                                                             |
| 11  | 14908                      | 670.8          | 0.017            | HOMO(A)»L+5(A) (61%)<br>HOMO(A)»L+6(A) (10%)                                                                     |
| 12  | 15131                      | 660.9          | 0.028            | H-2(B)»LUMO(B) (74%)                                                                                             |
| 13  | 15644                      | 639.2          | 0.014            | H-1(A)»L+3(A) (24%)<br>H-1(B)»LUMO(B) (16%)<br>HOMO(B)»L+4(B) (13%)                                              |
| 14  | 16109                      | 620.8          | 0.001            | H-1(A)»L+2(A) (16%)<br>H-1(A)»L+4(A) (25%)<br>H-2(B)»LUMO(B) (12%)<br>HOMO(B)»L+5(B) (18%)                       |
| 15  | 16651                      | 600.6          | 0.001            | H-3(B)»LUMO(B) (56%)                                                                                             |
| 16  | 16876                      | 592.6          | 0.093            | H-1(A)»LUMO(A) (48%)<br>HOMO(B)»L+2(B) (50%)                                                                     |
| 17  | 16896                      | 591.9          | 0.119            | H-1(A)»L+1(A) (47%)<br>HOMO(B)»L+1(B) (49%)                                                                      |
| 18  | 17113                      | 584.4          | 0.048            | HOMO(A)»L+5(A) (12%)<br>HOMO(A)»L+6(A) (11%)<br>H-4(B)»LUMO(B) (54%)                                             |
| 19  | 17261                      | 579.3          | 0.264            | H-1(A)»L+2(A) (38%)<br>HOMO(B)»L+3(B) (53%)                                                                      |
| 20  | 17327                      | 577.1          | 0.031            | H-1(A)»L+3(A) (30%)<br>H-1(A)»L+5(A) (13%)<br>HOMO(B)»L+6(B) (13%)                                               |
| 21  | 17652                      | 566.5          | 0.025            | HOMO(A)»L+6(A) (51%)<br>HOMO(B)»L+5(B) (17%)                                                                     |
| 22  | 17805                      | 561.6          | 0.470            | H-1(A)»L+3(A) (21%)<br>HOMO(B)»L+4(B) (51%)                                                                      |
| 23  | 18047                      | 554.1          | 0.347            | H-1(A)»L+4(A) (37%)<br>H-4(B)»LUMO(B) (11%)<br>HOMO(B)»L+5(B) (35%)                                              |
| 24  | 18699                      | 534.8          | 0.008            | H-2(A)»LUMO(A) (10%)<br>HOMO(A)»L+7(A) (33%)                                                                     |
| 25  | 19005                      | 526.2          | 0.003            | H-1(B)»L+2(B) (13%)                                                                                              |
| 26  | 19106                      | 523.4          | 0.015            | H-3(A)»L+1(A) (11%)<br>HOMO(A)»L+7(A) (10%)<br>H-1(B)»L+1(B) (14%)                                               |
| 27  | 19305                      | 518.0          | 0.016            | HOMO(A)»L+7(A) (36%)<br>H-8(B)»LUMO(B) (10%)                                                                     |
| 28  | 19447                      | 514.2          | 0.025            | H-2(A)»L+2(A) (19%)<br>H-2(B)»L+3(B) (17%)                                                                       |
| 29  | 19683                      | 508.0          | 0.004            | HOMO(A)»L+7(A) (10%)<br>HOMO(B)»L+6(B) (14%)                                                                     |
| 30  | 19779                      | 505.6          | 0.006            | H-6(B)»LUMO(B) (14%)                                                                                             |
| 31  | 19796                      | 505.2          | 0.009            | H-5(B)»LUMO(B) (10%)<br>HOMO(B)»L+6(B) (15%)                                                                     |
| 32  | 20077                      | 498.1          | 0.015            | H-1(A)»L+5(A) (48%)<br>HOMO(B)»L+6(B) (33%)                                                                      |
| 33  | 20107                      | 497.3          | 0.001            | H-4(A)»L+1(A) (10%)<br>H-4(B)»L+1(B) (15%)                                                                       |
| 34  | 20189                      | 495.3          | 0.002            |                                                                                                                  |
| 35  | 20434                      | 489.4          | 0.001            | H-2(A)»L+1(A) (11%)<br>H-2(B)»L+1(B) (11%)                                                                       |
| 36  | 20672                      | 483.7          | 0.002            | H-1(A)»L+5(A) (13%)                                                                                              |
| 37  | 20753                      | 481.8          | 0.000            | H-2(A)»L+4(A) (10%)                                                                                              |
| 38  | 20954                      | 477.2          | 0.002            | H-5(B)»LUMO(B) (42%)                                                                                             |
| 39  | 21112                      | 473.7          | 0.003            | H-3(A)»L+1(A) (18%)<br>H-2(A)»LUMO(A) (24%)<br>H-2(B)»L+2(B) (22%)<br>H-1(B)»L+1(B) (16%)                        |
| 40  | 21154                      | 472.7          | 0.001            |                                                                                                                  |
| 41  | 21429                      | 466.6          | 0.036            | H-2(A)»L+2(A) (36%)<br>H-2(B)»L+3(B) (23%)<br>H-1(B)»L+2(B) (10%)                                                |
| 42  | 21531                      | 464.4          | 0.086            | HOMO(A)»L+8(A) (14%)<br>H-2(B)»L+2(B) (18%)<br>H-1(B)»L+1(B) (27%)                                               |
| 43  | 21634                      | 462.2          | 0.155            | H-3(A)»LUMO(A) (10%)<br>H-2(A)»L+1(A) (22%)<br>H-2(A)»L+2(A) (10%)<br>H-2(B)»L+1(B) (23%)<br>H-1(B)»L+2(B) (10%) |
| 44  | 21658                      | 461.7          | 0.025            | H-1(A)»L+6(A) (31%)<br>HOMO(B)»L+7(B) (20%)                                                                      |
| 45  | 21740                      | 460.0          | 0.088            | H-3(A)»L+1(A) (25%)<br>H-2(A)»LUMO(A) (16%)<br>H-1(B)»L+5(B) (13%)                                               |
| 46  | 21852                      | 457.6          | 0.022            | H-3(A)»LUMO(A) (15%)<br>H-2(A)»L+1(A) (29%)<br>H-1(B)»L+2(B) (27%)                                               |
| 47  | 21999                      | 454.6          | 0.004            | H-3(A)»LUMO(A) (19%)<br>H-2(B)»L+1(B) (18%)<br>HOMO(B)»L+8(B) (11%)                                              |
| 48  | 22017                      | 454.2          | 0.020            | H-3(A)»L+4(A) (13%)<br>HOMO(A)»L+8(A) (15%)<br>H-1(B)»L+5(B) (10%)                                               |
| 49  | 22120                      | 452.1          | 0.008            | H-1(A)»L+7(A) (12%)<br>H-6(B)»LUMO(B) (38%)<br>HOMO(B)»L+8(B) (11%)                                              |
| 50  | 22197                      | 450.5          | 0.001            | H-2(A)»L+3(A) (13%)<br>H-4(B)»L+2(B) (14%)<br>H-3(B)»L+1(B) (14%)<br>H-1(B)»L+3(B) (18%)                         |
| 51  | 22325                      | 447.9          | 0.000            | H-3(A)»L+2(A) (38%)<br>H-2(B)»L+4(B) (11%)                                                                       |
| 52  | 22348                      | 447.5          | 0.007            | H-1(B)»L+4(B) (49%)                                                                                              |
| 53  | 22415                      | 446.1          | 0.014            | H-2(A)»L+3(A) (19%)<br>H-2(B)»L+4(B) (28%)<br>H-1(B)»L+3(B) (18%)                                                |
| 54  | 22450                      | 445.4          | 0.059            | H-3(A)»L+3(A) (56%)<br>H-1(B)»L+4(B) (11%)                                                                       |
| 55  | 22524                      | 444.0          | 0.001            | HOMO(B)»L+7(B) (14%)                                                                                             |
| 56  | 22546                      | 443.5          | 0.002            | HOMO(B)»L+8(B) (13%)                                                                                             |

|    |       |       |       |                                                                                           |     |       |       |       |                                                                                          |
|----|-------|-------|-------|-------------------------------------------------------------------------------------------|-----|-------|-------|-------|------------------------------------------------------------------------------------------|
| 57 | 22692 | 440.7 | 0.017 | H-1(A)»L+6(A) (35%)<br>HOMO(A)»L+8(A) (11%)<br>HOMO(B)»L+7(B) (22%)                       | 82  | 24496 | 408.2 | 0.060 | H-2(A)»L+7(A) (12%)<br>H-2(B)»L+8(B) (11%)<br>H-1(B)»L+6(B) (35%)                        |
| 58 | 22755 | 439.5 | 0.002 | H-2(A)»L+4(A) (33%)<br>H-9(B)»LUMO(B) (12%)                                               | 83  | 24521 | 407.8 | 0.005 | H-4(A)»L+3(A) (11%)<br>H-16(B)»LUMO(B) (15%)<br>H-4(B)»L+4(B) (23%)                      |
| 59 | 22837 | 437.9 | 0.005 | HOMO(A)»L+8(A) (18%)                                                                      | 84  | 24605 | 406.4 | 0.020 | H-19(B)»LUMO(B) (16%)                                                                    |
| 60 | 22923 | 436.2 | 0.001 | H-3(A)»L+2(A) (13%)<br>H-7(B)»LUMO(B) (27%)                                               | 85  | 24693 | 405.0 | 0.016 | H-3(A)»L+5(A) (12%)<br>H-1(A)»L+8(A) (17%)                                               |
| 61 | 23121 | 432.5 | 0.003 |                                                                                           | 86  | 24764 | 403.8 | 0.013 | H-18(B)»LUMO(B) (20%)                                                                    |
| 62 | 23131 | 432.3 | 0.009 | H-5(A)»LUMO(A) (13%)<br>H-3(B)»L+2(B) (18%)<br>H-2(B)»L+5(B) (15%)                        | 87  | 24765 | 403.8 | 0.001 | H-4(A)»L+3(A) (20%)                                                                      |
| 63 | 23159 | 431.8 | 0.000 | H-5(A)»L+1(A) (12%)<br>H-8(B)»LUMO(B) (28%)<br>H-7(B)»LUMO(B) (27%)                       | 88  | 24789 | 403.4 | 0.000 | H-11(A)»L+1(A) (14%)                                                                     |
| 64 | 23221 | 430.7 | 0.067 | H-5(A)»L+1(A) (20%)<br>H-4(B)»L+2(B) (15%)<br>H-3(B)»L+1(B) (12%)                         | 89  | 24800 | 403.2 | 0.005 | H-12(A)»L+1(A) (19%)<br>H-14(B)»L+1(B) (18%)                                             |
| 65 | 23347 | 428.3 | 0.011 | H-4(A)»LUMO(A) (42%)<br>H-4(B)»L+2(B) (12%)                                               | 90  | 24839 | 402.6 | 0.011 | H-16(B)»LUMO(B) (12%)                                                                    |
| 66 | 23354 | 428.2 | 0.150 | H-5(A)»L+3(A) (14%)<br>H-1(A)»L+7(A) (16%)<br>H-2(B)»L+5(B) (12%)<br>HOMO(B)»L+8(B) (11%) | 91  | 24852 | 402.4 | 0.054 | H-5(A)»LUMO(A) (14%)<br>H-3(A)»L+5(A) (33%)<br>H-1(B)»L+6(B) (17%)                       |
| 67 | 23420 | 427.0 | 0.035 | H-4(A)»L+2(A) (12%)<br>H-1(A)»L+7(A) (17%)<br>H-4(B)»L+3(B) (16%)<br>HOMO(B)»L+8(B) (19%) | 92  | 24995 | 400.1 | 0.005 | H-5(A)»L+4(A) (11%)<br>H-2(A)»L+5(A) (23%)<br>H-2(B)»L+6(B) (21%)                        |
| 68 | 23497 | 425.6 | 0.000 | H-12(B)»LUMO(B) (55%)                                                                     | 93  | 25207 | 396.7 | 0.018 | H-4(A)»L+1(A) (10%)                                                                      |
| 69 | 23499 | 425.6 | 0.000 | H-15(B)»LUMO(B) (21%)<br>H-10(B)»LUMO(B) (41%)                                            | 94  | 25229 | 396.4 | 0.020 | H-16(B)»LUMO(B) (15%)                                                                    |
| 70 | 23591 | 423.9 | 0.081 | H-9(B)»LUMO(B) (22%)<br>H-3(B)»L+4(B) (16%)                                               | 95  | 25298 | 395.3 | 0.003 | H-17(B)»LUMO(B) (10%)                                                                    |
| 71 | 23742 | 421.2 | 0.058 | H-3(A)»L+4(A) (21%)<br>H-4(B)»L+2(B) (12%)<br>H-1(B)»L+5(B) (24%)                         | 96  | 25482 | 392.4 | 0.002 | H-4(A)»L+4(A) (16%)                                                                      |
| 72 | 23774 | 420.6 | 0.044 | H-5(A)»LUMO(A) (10%)<br>H-4(A)»L+1(A) (12%)<br>H-4(B)»L+1(B) (33%)<br>H-3(B)»L+2(B) (15%) | 97  | 25486 | 392.4 | 0.089 | H-5(A)»L+4(A) (23%)<br>H-4(A)»L+3(A) (12%)<br>H-2(A)»L+5(A) (10%)<br>H-3(B)»L+5(B) (11%) |
| 73 | 23851 | 419.3 | 0.054 | H-4(A)»L+2(A) (14%)<br>H-4(B)»L+3(B) (20%)                                                | 98  | 25519 | 391.9 | 0.037 | H-17(B)»LUMO(B) (14%)<br>H-4(B)»L+5(B) (38%)                                             |
| 74 | 23937 | 417.8 | 0.061 | H-5(A)»L+1(A) (10%)<br>H-3(A)»L+4(A) (10%)<br>H-2(A)»L+5(A) (17%)<br>H-2(B)»L+6(B) (18%)  | 99  | 25566 | 391.1 | 0.002 |                                                                                          |
| 75 | 23983 | 417.0 | 0.056 | HOMO(A)»L+9(A) (64%)                                                                      | 100 | 25584 | 390.9 | 0.007 | H-4(A)»L+4(A) (29%)                                                                      |
| 76 | 23988 | 416.9 | 0.014 | H-5(A)»L+2(A) (20%)<br>H-3(B)»L+3(B) (46%)                                                | 101 | 25595 | 390.7 | 0.105 | H-5(A)»L+4(A) (19%)                                                                      |
| 77 | 24065 | 415.5 | 0.046 | H-4(A)»L+1(A) (17%)<br>H-4(A)»L+2(A) (15%)                                                | 102 | 25639 | 390.0 | 0.010 | H-17(B)»LUMO(B) (15%)                                                                    |
| 78 | 24187 | 413.4 | 0.028 | H-5(A)»L+2(A) (17%)<br>H-2(B)»L+6(B) (10%)                                                | 103 | 25683 | 389.4 | 0.002 |                                                                                          |
| 79 | 24203 | 413.2 | 0.151 | H-5(A)»L+3(A) (30%)<br>H-3(B)»L+4(B) (35%)                                                | 104 | 25752 | 388.3 | 0.001 |                                                                                          |
| 80 | 24452 | 409.0 | 0.008 | H-13(B)»LUMO(B) (16%)<br>H-13(B)»L+3(B) (10%)<br>H-11(B)»L+2(B) (11%)                     | 105 | 26050 | 383.9 | 0.003 | H-14(A)»LUMO(A) (18%)<br>H-13(A)»L+2(A) (17%)<br>H-11(B)»LUMO(B) (30%)                   |
| 81 | 24464 | 408.8 | 0.001 | H-13(B)»L+2(B) (15%)<br>H-11(B)»LUMO(B) (20%)<br>H-11(B)»L+3(B) (13%)                     | 106 | 26053 | 383.8 | 0.000 | H-14(A)»L+2(A) (17%)<br>H-13(A)»LUMO(A) (23%)<br>H-13(B)»LUMO(B) (37%)                   |
|    |       |       |       |                                                                                           | 107 | 26130 | 382.7 | 0.007 | H-26(B)»LUMO(B) (11%)<br>H-20(B)»LUMO(B) (16%)<br>H-3(B)»L+6(B) (23%)                    |
|    |       |       |       |                                                                                           | 108 | 26241 | 381.1 | 0.000 |                                                                                          |
|    |       |       |       |                                                                                           | 109 | 26288 | 380.4 | 0.000 | H-5(B)»L+2(B) (12%)<br>H-1(B)»L+7(B) (14%)                                               |
|    |       |       |       |                                                                                           | 110 | 26377 | 379.1 | 0.001 | H-15(A)»L+2(A) (21%)<br>H-15(A)»L+3(A) (30%)<br>H-15(A)»L+4(A) (11%)                     |
|    |       |       |       |                                                                                           | 111 | 26378 | 379.1 | 0.000 | H-16(A)»L+2(A) (21%)<br>H-16(A)»L+3(A) (30%)<br>H-16(A)»L+4(A) (11%)                     |

|     |       |       |       |                                                                                               |  |  |  |                                                                                                    |
|-----|-------|-------|-------|-----------------------------------------------------------------------------------------------|--|--|--|----------------------------------------------------------------------------------------------------|
| 112 | 26453 | 378.0 | 0.021 | H-3(A)»L+6(A) (13%)<br>H-5(B)»L+2(B) (13%)                                                    |  |  |  | HOMO(A)»L+14(A)<br>(11%)                                                                           |
| 113 | 26490 | 377.5 | 0.002 | H-12(A)»L+1(A) (14%)<br>H-14(B)»LUMO(B)<br>(53%)                                              |  |  |  | H-8(A)»LUMO(A) (12%)<br>H-7(B)»L+2(B) (17%)                                                        |
| 114 | 26496 | 377.4 | 0.001 | H-11(A)»L+1(A) (13%)<br>H-15(B)»LUMO(B)<br>(26%)<br>H-10(B)»LUMO(B)<br>(14%)                  |  |  |  | H-4(A)»L+5(A) (10%)<br>H-7(B)»L+1(B) (13%)                                                         |
| 115 | 26578 | 376.3 | 0.002 | H-5(B)»L+1(B) (23%)                                                                           |  |  |  | H-6(A)»LUMO(A) (16%)<br>H-6(B)»L+2(B) (13%)<br>H-2(B)»L+7(B) (12%)                                 |
| 116 | 26620 | 375.7 | 0.021 | H-5(A)»L+5(A) (12%)<br>H-1(A)»L+8(A) (15%)                                                    |  |  |  | H-7(A)»LUMO(A) (12%)<br>H-7(A)»L+3(A) (14%)                                                        |
| 117 | 26630 | 375.5 | 0.003 | H-1(B)»L+7(B) (10%)                                                                           |  |  |  | H-5(B)»L+3(B) (13%)                                                                                |
| 118 | 26655 | 375.2 | 0.002 | H-3(A)»L+7(A) (13%)<br>H-1(B)»L+8(B) (26%)                                                    |  |  |  | H-26(B)»LUMO(B)<br>(17%)<br>H-20(B)»LUMO(B)<br>(21%)                                               |
| 119 | 26708 | 374.4 | 0.033 | HOMO(B)»L+9(B) (42%)                                                                          |  |  |  | H-21(B)»LUMO(B)<br>(13%)<br>H-19(B)»LUMO(B)<br>(13%)                                               |
| 120 | 26776 | 373.5 | 0.010 | H-11(A)»L+1(A) (11%)<br>H-15(B)»LUMO(B)<br>(19%)<br>H-10(B)»LUMO(B)<br>(11%)                  |  |  |  | H-6(A)»L+2(A) (12%)<br>H-26(B)»LUMO(B)<br>(11%)<br>H-20(B)»LUMO(B)<br>(12%)<br>H-7(B)»L+2(B) (13%) |
| 121 | 26791 | 373.3 | 0.001 | H-12(A)»L+1(A) (14%)<br>H-14(B)»LUMO(B)<br>(34%)<br>H-14(B)»L+1(B) (19%)                      |  |  |  |                                                                                                    |
| 122 | 26931 | 371.3 | 0.000 | H-5(A)»L+5(A) (11%)<br>H-5(B)»L+2(B) (21%)                                                    |  |  |  | H-6(A)»L+2(A) (12%)<br>H-26(B)»LUMO(B)<br>(11%)<br>H-20(B)»LUMO(B)<br>(12%)<br>H-7(B)»L+2(B) (13%) |
| 123 | 26949 | 371.1 | 0.006 | H-4(A)»L+5(A) (12%)<br>H-22(B)»LUMO(B)<br>(10%)<br>H-4(B)»L+6(B) (18%)                        |  |  |  | H-26(B)»LUMO(B)<br>(11%)<br>H-20(B)»LUMO(B)<br>(12%)<br>H-7(B)»L+2(B) (13%)                        |
| 124 | 27012 | 370.2 | 0.032 | H-2(A)»L+6(A) (26%)<br>H-5(B)»L+3(B) (10%)                                                    |  |  |  |                                                                                                    |
| 125 | 27039 | 369.8 | 0.012 | H-7(A)»LUMO(A) (37%)<br>H-5(B)»L+2(B) (10%)                                                   |  |  |  |                                                                                                    |
| 126 | 27067 | 369.5 | 0.014 | H-2(B)»L+7(B) (16%)                                                                           |  |  |  |                                                                                                    |
| 127 | 27139 | 368.5 | 0.033 | H-22(B)»LUMO(B)<br>(22%)<br>H-21(B)»LUMO(B)<br>(13%)                                          |  |  |  |                                                                                                    |
| 128 | 27222 | 367.3 | 0.003 | H-6(B)»L+1(B) (13%)                                                                           |  |  |  |                                                                                                    |
| 129 | 27248 | 367.0 | 0.009 | HOMO(A)»L+10(A)<br>(24%)<br>H-11(B)»LUMO(B)<br>(11%)                                          |  |  |  |                                                                                                    |
| 130 | 27260 | 366.8 | 0.004 | H-13(B)»LUMO(B)<br>(16%)<br>H-13(B)»L+3(B) (10%)<br>H-11(B)»L+2(B) (12%)                      |  |  |  |                                                                                                    |
| 131 | 27267 | 366.7 | 0.003 | HOMO(A)»L+10(A)<br>(16%)<br>H-13(B)»L+2(B) (10%)<br>H-11(B)»LUMO(B)<br>(12%)                  |  |  |  |                                                                                                    |
| 132 | 27342 | 365.7 | 0.004 | H-7(A)»L+1(A) (16%)                                                                           |  |  |  |                                                                                                    |
| 133 | 27429 | 364.6 | 0.006 | H-4(A)»L+5(A) (10%)<br>H-6(B)»L+2(B) (11%)                                                    |  |  |  |                                                                                                    |
| 134 | 27484 | 363.8 | 0.112 | H-6(A)»L+1(A) (17%)<br>H-3(A)»L+6(A) (11%)<br>H-6(B)»L+1(B) (24%)                             |  |  |  |                                                                                                    |
| 135 | 27499 | 363.6 | 0.189 | H-8(A)»L+1(A) (10%)<br>H-7(B)»L+1(B) (10%)<br>H-5(B)»L+3(B) (14%)<br>HOMO(B)»L+10(B)<br>(11%) |  |  |  |                                                                                                    |
| 136 | 27537 | 363.2 | 0.018 | HOMO(A)»L+11(A)<br>(46%)                                                                      |  |  |  |                                                                                                    |
| 137 | 27554 | 362.9 | 0.055 |                                                                                               |  |  |  |                                                                                                    |
| 138 | 27595 | 362.4 | 0.047 |                                                                                               |  |  |  |                                                                                                    |
| 139 | 27673 | 361.4 | 0.017 |                                                                                               |  |  |  |                                                                                                    |
| 140 | 27674 | 361.3 | 0.062 |                                                                                               |  |  |  |                                                                                                    |
| 141 | 27689 | 361.2 | 0.011 |                                                                                               |  |  |  |                                                                                                    |
| 142 | 27712 | 360.8 | 0.004 |                                                                                               |  |  |  |                                                                                                    |
| 143 | 27758 | 360.3 | 0.003 |                                                                                               |  |  |  |                                                                                                    |
| 144 | 27812 | 359.6 | 0.113 |                                                                                               |  |  |  |                                                                                                    |
| 145 | 27878 | 358.7 | 0.013 |                                                                                               |  |  |  |                                                                                                    |
| 146 | 27879 | 358.7 | 0.016 |                                                                                               |  |  |  |                                                                                                    |
| 147 | 27947 | 357.8 | 0.052 |                                                                                               |  |  |  |                                                                                                    |
| 148 | 27977 | 357.4 | 0.023 |                                                                                               |  |  |  |                                                                                                    |
| 149 | 27988 | 357.3 | 0.001 |                                                                                               |  |  |  |                                                                                                    |
| 150 | 27995 | 357.2 | 0.061 |                                                                                               |  |  |  |                                                                                                    |
| 151 | 28014 | 357.0 | 0.007 |                                                                                               |  |  |  |                                                                                                    |
| 152 | 28036 | 356.7 | 0.001 |                                                                                               |  |  |  |                                                                                                    |
| 153 | 28139 | 355.4 | 0.012 |                                                                                               |  |  |  |                                                                                                    |
| 154 | 28154 | 355.2 | 0.037 |                                                                                               |  |  |  |                                                                                                    |
| 155 | 28166 | 355.0 | 0.014 |                                                                                               |  |  |  |                                                                                                    |
| 156 | 28219 | 354.4 | 0.003 |                                                                                               |  |  |  |                                                                                                    |
| 157 | 28254 | 353.9 | 0.051 |                                                                                               |  |  |  |                                                                                                    |
| 158 | 28322 | 353.1 | 0.001 |                                                                                               |  |  |  |                                                                                                    |
| 159 | 28412 | 352.0 | 0.049 |                                                                                               |  |  |  |                                                                                                    |
| 160 | 28417 | 351.9 | 0.022 |                                                                                               |  |  |  |                                                                                                    |
| 161 | 28425 | 351.8 | 0.009 |                                                                                               |  |  |  |                                                                                                    |
| 162 | 28443 | 351.6 | 0.027 |                                                                                               |  |  |  |                                                                                                    |
| 163 | 28459 | 351.4 | 0.061 |                                                                                               |  |  |  |                                                                                                    |
| 164 | 28488 | 351.0 | 0.006 |                                                                                               |  |  |  |                                                                                                    |
| 165 | 28516 | 350.7 | 0.006 |                                                                                               |  |  |  |                                                                                                    |



|     |       |       |       |                                                                          |     |       |       |       |                                                                             |
|-----|-------|-------|-------|--------------------------------------------------------------------------|-----|-------|-------|-------|-----------------------------------------------------------------------------|
| 166 | 28577 | 349.9 | 0.001 | H-24(B)»LUMO(B)<br>(34%)                                                 | 187 | 29202 | 342.4 | 0.029 | HOMO(A)»L+13(A)<br>(11%)<br>HOMO(A)»L+16(A)<br>(13%)<br>H-7(B)»L+4(B) (20%) |
| 167 | 28630 | 349.3 | 0.012 |                                                                          | 188 | 29290 | 341.4 | 0.038 | H-3(B)»L+8(B) (11%)                                                         |
| 168 | 28677 | 348.7 | 0.000 |                                                                          | 189 | 29305 | 341.2 | 0.007 | HOMO(A)»L+13(A)<br>(18%)<br>HOMO(A)»L+16(A)<br>(16%)                        |
| 169 | 28720 | 348.2 | 0.001 | H-8(A)»L+2(A) (13%)<br>H-24(B)»LUMO(B)<br>(16%)                          | 190 | 29378 | 340.4 | 0.002 | H-6(A)»L+4(A) (16%)<br>H-7(B)»L+4(B) (13%)<br>H-5(B)»L+6(B) (12%)           |
| 170 | 28748 | 347.9 | 0.002 |                                                                          | 191 | 29379 | 340.4 | 0.021 | H-8(A)»L+4(A) (31%)                                                         |
| 171 | 28779 | 347.5 | 0.006 | H-8(A)»L+3(A) (17%)<br>H-8(B)»L+2(B) (13%)                               | 192 | 29392 | 340.2 | 0.044 | H-8(B)»L+4(B) (16%)<br>H-6(B)»L+5(B) (22%)                                  |
| 172 | 28810 | 347.1 | 0.003 | H-8(B)»L+1(B) (66%)                                                      | 193 | 29412 | 340.0 | 0.022 | H-8(A)»L+4(A) (11%)<br>HOMO(A)»L+17(A)<br>(23%)                             |
| 173 | 28833 | 346.8 | 0.003 |                                                                          | 194 | 29492 | 339.1 | 0.003 | HOMO(A)»L+17(A)<br>(15%)<br>H-4(B)»L+7(B) (20%)                             |
| 174 | 28838 | 346.8 | 0.002 | H-34(B)»L+2(B) (12%)<br>H-33(B)»LUMO(B)<br>(12%)<br>H-33(B)»L+3(B) (11%) | 195 | 29536 | 338.6 | 0.060 | H-9(A)»LUMO(A) (33%)<br>H-6(B)»L+5(B) (10%)                                 |
| 175 | 28848 | 346.6 | 0.001 |                                                                          | 196 | 29661 | 337.1 | 0.052 |                                                                             |
| 176 | 28874 | 346.3 | 0.000 | H-8(A)»L+2(A) (11%)<br>H-9(B)»L+2(B) (16%)<br>H-7(B)»L+3(B) (17%)        | 197 | 29662 | 337.1 | 0.025 | H-4(A)»L+6(A) (15%)<br>H-7(B)»L+5(B) (15%)                                  |
| 177 | 28914 | 345.9 | 0.006 | H-8(B)»L+2(B) (21%)<br>H-3(B)»L+7(B) (13%)                               | 198 | 29678 | 337.0 | 0.025 | H-9(A)»LUMO(A) (14%)<br>H-9(A)»L+3(A) (34%)<br>H-8(B)»L+4(B) (10%)          |
| 178 | 28943 | 345.5 | 0.010 | H-6(B)»L+4(B) (17%)                                                      | 199 | 29713 | 336.5 | 0.057 |                                                                             |
| 179 | 28951 | 345.4 | 0.007 | H-6(A)»L+4(A) (15%)                                                      | 200 | 29797 | 335.6 | 0.054 | H-6(B)»L+5(B) (13%)                                                         |
| 180 | 28984 | 345.0 | 0.000 | H-8(B)»L+3(B) (18%)                                                      |     |       |       |       |                                                                             |
| 181 | 29017 | 344.6 | 0.001 |                                                                          |     |       |       |       |                                                                             |
| 182 | 29042 | 344.3 | 0.000 | H-25(B)»LUMO(B)<br>(48%)<br>H-23(B)»LUMO(B)<br>(16%)                     |     |       |       |       |                                                                             |
| 183 | 29060 | 344.1 | 0.001 | H-31(A)»L+1(A) (12%)<br>H-36(B)»L+1(B) (15%)<br>H-25(B)»LUMO(B)<br>(14%) |     |       |       |       |                                                                             |
| 184 | 29101 | 343.6 | 0.008 | HOMO(A)»L+15(A)<br>(10%)                                                 |     |       |       |       |                                                                             |
| 185 | 29140 | 343.2 | 0.001 | H-8(A)»L+3(A) (10%)<br>H-3(B)»L+7(B) (20%)                               |     |       |       |       |                                                                             |
| 186 | 29182 | 342.7 | 0.048 | H-7(A)»L+4(A) (17%)<br>H-8(B)»L+3(B) (16%)<br>H-5(B)»L+5(B) (12%)        |     |       |       |       |                                                                             |

[a] Oscillator strength. [b] Contributions smaller than 10% are not included. H = HOMO, L = LUMO. Orbitals are numbered consecutively regardless of possible degeneracies.

**Table S4.** Electronic transitions calculated for  $4_2$  using the TDA/B3LYP/3-21G level of theory.

| No. | Energy<br>( $\text{cm}^{-1}$ ) | $\lambda$<br>(nm) | $f^{\text{a}}$ | Major<br>excitations <sup>[b]</sup>                                 |
|-----|--------------------------------|-------------------|----------------|---------------------------------------------------------------------|
| 1   | 14807                          | 675.4             | 0.001          | HOMO»LUMO (73%)                                                     |
| 2   | 15087                          | 662.8             | 0.005          | H-1»LUMO (21%)<br>HOMO»L+1 (65%)                                    |
| 3   | 15595                          | 641.2             | 0.010          | HOMO»L+2 (76%)                                                      |
| 4   | 16209                          | 617.0             | 0.010          | H-1»L+1 (12%)<br>H-1»L+2 (22%)<br>HOMO»L+3 (49%)                    |
| 5   | 16308                          | 613.2             | 0.021          | H-1»LUMO (62%)<br>HOMO»L+1 (21%)                                    |
| 6   | 16567                          | 603.6             | 0.017          | H-1»L+1 (57%)<br>H-1»L+2 (15%)                                      |
| 7   | 16886                          | 592.2             | 0.061          | H-1»L+2 (45%)<br>HOMO»L+3 (21%)<br>HOMO»L+5 (11%)                   |
| 8   | 17030                          | 587.2             | 0.145          | HOMO»L+3 (10%)<br>HOMO»L+4 (68%)                                    |
| 9   | 17250                          | 579.7             | 0.185          | HOMO»L+5 (62%)<br>HOMO»L+6 (11%)                                    |
| 10  | 17431                          | 573.7             | 0.075          | H-1»L+3 (44%)<br>HOMO»L+6 (36%)                                     |
| 11  | 17571                          | 569.1             | 0.074          | H-1»L+3 (34%)<br>HOMO»L+5 (17%)<br>HOMO»L+6 (28%)                   |
| 12  | 17712                          | 564.6             | 0.158          | H-1»L+4 (56%)<br>HOMO»L+6 (10%)<br>HOMO»L+7 (19%)                   |
| 13  | 17960                          | 556.8             | 0.107          | H-2»LUMO (16%)<br>H-1»L+5 (34%)<br>HOMO»L+7 (16%)                   |
| 14  | 18075                          | 553.3             | 0.016          | H-2»LUMO (16%)<br>H-1»L+4 (19%)<br>HOMO»L+7 (40%)                   |
| 15  | 18205                          | 549.3             | 0.019          | H-2»LUMO (34%)<br>H-2»L+1 (13%)<br>HOMO»L+8 (22%)                   |
| 16  | 18344                          | 545.1             | 0.061          | H-1»L+5 (43%)<br>HOMO»L+9 (19%)                                     |
| 17  | 18415                          | 543.0             | 0.200          | H-1»L+5 (10%)<br>H-1»L+6 (20%)<br>HOMO»L+9 (44%)                    |
| 18  | 18476                          | 541.3             | 0.201          | H-2»L+1 (27%)<br>HOMO»L+8 (50%)                                     |
| 19  | 18578                          | 538.3             | 0.105          | H-2»L+1 (29%)<br>H-1»L+6 (40%)<br>HOMO»L+9 (12%)                    |
| 20  | 18929                          | 528.3             | 0.047          | H-1»L+7 (80%)                                                       |
| 21  | 19000                          | 526.3             | 0.020          | H-2»L+2 (71%)                                                       |
| 22  | 19265                          | 519.1             | 0.099          | H-3»LUMO (47%)<br>H-1»L+9 (15%)                                     |
| 23  | 19319                          | 517.6             | 0.064          | H-3»LUMO (15%)<br>H-1»L+9 (51%)                                     |
| 24  | 19457                          | 514.0             | 0.100          | H-1»L+8 (55%)                                                       |
| 25  | 19663                          | 508.6             | 0.022          | H-3»L+1 (31%)<br>H-2»L+3 (17%)<br>H-2»L+4 (10%)<br>H-1»L+8 (10%)    |
| 26  | 19679                          | 508.2             | 0.046          | H-3»L+1 (28%)<br>H-2»L+4 (12%)<br>H-1»L+9 (10%)<br>HOMO»L+10 (24%)  |
| 27  | 19805                          | 504.9             | 0.033          | H-4»LUMO (11%)<br>H-2»L+3 (28%)<br>HOMO»L+10 (33%)                  |
| 28  | 19874                          | 503.2             | 0.041          | H-2»L+3 (22%)<br>H-2»L+4 (51%)                                      |
| 29  | 20022                          | 499.5             | 0.011          | H-4»LUMO (57%)                                                      |
| 30  | 20064                          | 498.4             | 0.121          | H-3»L+2 (65%)                                                       |
| 31  | 20096                          | 497.6             | 0.090          | H-2»L+4 (11%)<br>HOMO»L+11 (52%)                                    |
| 32  | 20304                          | 492.5             | 0.009          | H-4»L+1 (14%)<br>H-2»L+5 (59%)                                      |
| 33  | 20386                          | 490.5             | 0.011          | H-4»L+1 (61%)<br>H-2»L+5 (12%)                                      |
| 34  | 20530                          | 487.1             | 0.022          | H-3»L+3 (17%)<br>H-3»L+4 (13%)<br>H-2»L+6 (19%)<br>H-1»L+10 (19%)   |
| 35  | 20653                          | 484.2             | 0.072          | H-3»L+3 (18%)<br>H-2»L+6 (24%)<br>H-1»L+10 (20%)                    |
| 36  | 20708                          | 482.9             | 0.052          | H-2»L+6 (36%)                                                       |
| 37  | 20741                          | 482.1             | 0.055          | H-3»L+4 (21%)<br>H-2»L+7 (45%)                                      |
| 38  | 20847                          | 479.7             | 0.020          | H-3»L+3 (44%)<br>H-1»L+10 (22%)                                     |
| 39  | 20905                          | 478.4             | 0.012          | H-3»L+4 (28%)<br>H-2»L+7 (21%)<br>H-1»L+10 (11%)<br>HOMO»L+12 (27%) |
| 40  | 20968                          | 476.9             | 0.033          | H-1»L+11 (44%)                                                      |
| 41  | 21021                          | 475.7             | 0.079          | H-4»L+2 (50%)<br>H-1»L+11 (10%)                                     |
| 42  | 21113                          | 473.6             | 0.029          | H-3»L+4 (22%)<br>H-1»L+11 (11%)<br>HOMO»L+12 (41%)                  |
| 43  | 21322                          | 469.0             | 0.021          | H-4»L+3 (15%)<br>H-3»L+5 (35%)<br>H-2»L+8 (10%)                     |
| 44  | 21379                          | 467.7             | 0.026          | H-5»LUMO (22%)<br>H-3»L+5 (13%)                                     |
| 45  | 21450                          | 466.2             | 0.099          | H-3»L+5 (21%)<br>H-3»L+6 (10%)<br>H-2»L+8 (35%)<br>H-2»L+9 (18%)    |
| 46  | 21545                          | 464.1             | 0.008          | H-5»LUMO (12%)<br>H-3»L+6 (10%)<br>H-2»L+9 (40%)                    |
| 47  | 21587                          | 463.2             | 0.029          | H-6»LUMO (13%)<br>H-5»LUMO (27%)<br>H-4»L+3 (13%)                   |
| 48  | 21700                          | 460.8             | 0.014          | H-3»L+6 (45%)<br>H-2»L+8 (14%)                                      |
| 49  | 21793                          | 458.9             | 0.031          | H-6»LUMO (24%)<br>H-5»L+1 (12%)<br>H-4»L+3 (27%)                    |
| 50  | 21875                          | 457.1             | 0.009          | H-6»LUMO (13%)<br>H-4»L+4 (14%)<br>H-3»L+7 (24%)<br>H-1»L+12 (18%)  |
| 51  | 21965                          | 455.3             | 0.003          | H-5»L+1 (40%)                                                       |

|    |       |       |       |                                                                  |     |       |       |       |                                                                    |
|----|-------|-------|-------|------------------------------------------------------------------|-----|-------|-------|-------|--------------------------------------------------------------------|
| 52 | 21991 | 454.7 | 0.014 | H-6»L+1 (12%)<br>H-2»L+9 (11%)<br>H-1»L+12 (38%)                 | 80  | 23446 | 426.5 | 0.013 | H-8»L+2 (10%)<br>H-5»L+5 (11%)<br>H-1»L+13 (23%)                   |
| 53 | 22128 | 451.9 | 0.003 | H-4»L+4 (14%)<br>H-3»L+7 (47%)                                   | 81  | 23519 | 425.2 | 0.020 | H-9»L+2 (12%)<br>H-7»L+2 (13%)<br>H-5»L+6 (16%)                    |
| 54 | 22141 | 451.7 | 0.040 | H-6»L+2 (17%)<br>H-5»L+2 (25%)                                   | 82  | 23581 | 424.1 | 0.002 | H-8»L+2 (26%)<br>H-1»L+13 (14%)<br>HOMO»L+15 (21%)                 |
| 55 | 22188 | 450.7 | 0.015 | H-6»L+1 (35%)<br>H-4»L+4 (13%)                                   | 83  | 23650 | 422.8 | 0.031 | H-6»L+4 (17%)<br>H-4»L+9 (12%)                                     |
| 56 | 22321 | 448.0 | 0.031 | H-4»L+5 (54%)                                                    | 84  | 23686 | 422.2 | 0.004 | H-9»L+2 (27%)<br>H-1»L+14 (22%)                                    |
| 57 | 22387 | 446.7 | 0.004 | H-7»LUMO (10%)<br>HOMO»L+13 (51%)                                | 85  | 23774 | 420.6 | 0.005 | H-3»L+10 (56%)                                                     |
| 58 | 22406 | 446.3 | 0.075 | H-4»L+6 (30%)                                                    | 86  | 23830 | 419.6 | 0.092 | H-9»L+2 (15%)<br>H-2»L+12 (12%)<br>H-1»L+14 (23%)                  |
| 59 | 22469 | 445.1 | 0.019 | H-6»L+2 (20%)<br>H-5»L+2 (11%)<br>H-4»L+7 (16%)                  | 87  | 23881 | 418.7 | 0.015 | H-6»L+5 (38%)                                                      |
| 60 | 22496 | 444.5 | 0.027 | H-9»LUMO (11%)<br>H-7»LUMO (26%)<br>HOMO»L+13 (15%)              | 88  | 23940 | 417.7 | 0.011 | H-8»L+3 (22%)<br>H-2»L+12 (20%)                                    |
| 61 | 22593 | 442.6 | 0.023 | H-6»L+2 (17%)<br>H-4»L+6 (14%)<br>H-4»L+7 (11%)                  | 89  | 23988 | 416.9 | 0.060 | H-8»L+3 (11%)<br>H-3»L+11 (17%)<br>H-2»L+12 (11%)                  |
| 62 | 22615 | 442.2 | 0.019 | H-7»L+1 (12%)<br>H-3»L+8 (27%)<br>H-3»L+9 (17%)                  | 90  | 24108 | 414.8 | 0.022 | H-7»L+3 (13%)<br>H-3»L+11 (35%)                                    |
| 63 | 22696 | 440.6 | 0.015 | H-8»LUMO (14%)<br>HOMO»L+14 (37%)                                | 91  | 24131 | 414.4 | 0.012 | H-9»L+3 (37%)                                                      |
| 64 | 22748 | 439.6 | 0.022 | H-2»L+10 (67%)                                                   | 92  | 24208 | 413.1 | 0.002 | H-6»L+6 (10%)<br>H-5»L+7 (35%)                                     |
| 65 | 22781 | 439.0 | 0.016 | H-3»L+9 (19%)                                                    | 93  | 24235 | 412.6 | 0.048 | H-9»L+3 (12%)<br>H-7»L+3 (28%)<br>H-3»L+11 (18%)                   |
| 66 | 22838 | 437.9 | 0.025 | H-8»LUMO (19%)<br>H-3»L+8 (19%)                                  | 94  | 24328 | 411.0 | 0.028 | H-8»L+4 (12%)<br>H-7»L+4 (10%)<br>H-6»L+7 (17%)<br>HOMO»L+16 (10%) |
| 67 | 22888 | 436.9 | 0.002 | H-9»LUMO (14%)<br>H-3»L+8 (14%)<br>H-2»L+11 (25%)                | 95  | 24335 | 410.9 | 0.030 | HOMO»L+16 (37%)                                                    |
| 68 | 22913 | 436.4 | 0.020 | H-2»L+11 (28%)                                                   | 96  | 24381 | 410.1 | 0.032 | H-8»L+4 (10%)<br>H-7»L+4 (59%)                                     |
| 69 | 22934 | 436.0 | 0.047 | H-6»L+3 (19%)<br>H-5»L+3 (31%)<br>H-2»L+11 (16%)                 | 97  | 24469 | 408.7 | 0.006 | H-6»L+5 (12%)<br>H-6»L+6 (33%)<br>H-5»L+5 (11%)                    |
| 70 | 22979 | 435.2 | 0.019 | H-8»LUMO (12%)<br>H-7»L+1 (27%)                                  | 98  | 24575 | 406.9 | 0.001 | H-27»LUMO (14%)<br>H-27»L+1 (24%)<br>H-27»L+3 (22%)                |
| 71 | 23038 | 434.1 | 0.013 | H-8»L+1 (18%)<br>H-6»L+3 (11%)<br>H-5»L+4 (15%)                  | 99  | 24582 | 406.8 | 0.009 | H-2»L+12 (21%)<br>H-1»L+15 (48%)                                   |
| 72 | 23117 | 432.6 | 0.051 | H-6»L+3 (11%)<br>H-5»L+3 (18%)                                   | 100 | 24612 | 406.3 | 0.002 | H-7»L+5 (17%)                                                      |
| 73 | 23196 | 431.1 | 0.043 | H-6»L+4 (15%)<br>H-4»L+9 (19%)                                   | 101 | 24624 | 406.1 | 0.003 | H-5»L+8 (30%)                                                      |
| 74 | 23217 | 430.7 | 0.013 | H-9»L+1 (16%)<br>H-9»L+2 (14%)<br>H-8»L+1 (10%)<br>H-4»L+8 (11%) | 102 | 24656 | 405.6 | 0.026 | H-8»L+5 (11%)<br>H-7»L+5 (18%)                                     |
| 75 | 23268 | 429.8 | 0.014 | H-9»L+1 (25%)<br>H-8»L+1 (12%)<br>H-7»L+2 (10%)                  | 103 | 24684 | 405.1 | 0.002 | H-24»L+2 (10%)<br>H-7»L+5 (14%)<br>H-5»L+8 (12%)                   |
| 76 | 23317 | 428.9 | 0.005 | H-7»L+2 (20%)<br>H-5»L+4 (20%)                                   | 104 | 24761 | 403.9 | 0.009 | H-8»L+4 (11%)<br>H-7»L+5 (10%)<br>H-6»L+8 (13%)                    |
| 77 | 23339 | 428.5 | 0.037 | H-8»L+2 (17%)<br>H-5»L+5 (13%)                                   | 105 | 24801 | 403.2 | 0.005 | H-21»L+4 (11%)<br>H-21»L+5 (18%)<br>H-21»L+6 (13%)                 |
| 78 | 23384 | 427.6 | 0.007 | H-8»L+2 (16%)<br>HOMO»L+15 (27%)                                 | 106 | 24818 | 402.9 | 0.001 | H-6»L+7 (11%)                                                      |
| 79 | 23398 | 427.4 | 0.035 | H-8»L+1 (26%)<br>H-7»L+2 (25%)<br>H-5»L+4 (10%)                  | 107 | 24859 | 402.3 | 0.012 | H-4»L+10 (22%)<br>HOMO»L+17 (22%)                                  |

|     |       |       |       |                                                                        |     |       |       |       |                                                    |
|-----|-------|-------|-------|------------------------------------------------------------------------|-----|-------|-------|-------|----------------------------------------------------|
| 108 | 24918 | 401.3 | 0.006 | H-6»L+8 (11%)                                                          | 134 | 25803 | 387.5 | 0.020 | H-2»L+14 (10%)<br>H-1»L+17 (10%)                   |
| 109 | 24931 | 401.1 | 0.000 | H-18»L+5 (22%)<br>H-18»L+6 (33%)                                       | 135 | 25836 | 387.1 | 0.005 |                                                    |
| 110 | 24953 | 400.8 | 0.003 | H-6»L+8 (12%)                                                          | 136 | 25869 | 386.6 | 0.004 | H-9»L+7 (53%)                                      |
| 111 | 24983 | 400.3 | 0.023 | H-11»LUMO (11%)<br>H-8»L+5 (14%)<br>H-7»L+6 (13%)                      | 137 | 25891 | 386.2 | 0.014 | H-11»L+2 (29%)<br>H-10»L+2 (10%)                   |
| 112 | 24999 | 400.0 | 0.002 | H-23»L+4 (14%)<br>H-23»L+7 (15%)                                       | 138 | 25960 | 385.2 | 0.012 | H-9»L+8 (10%)<br>H-7»L+8 (13%)<br>H-2»L+14 (26%)   |
| 113 | 25022 | 399.7 | 0.003 | H-6»L+9 (12%)<br>HOMO»L+17 (10%)                                       | 139 | 26048 | 383.9 | 0.004 | H-1»L+17 (53%)                                     |
| 114 | 25040 | 399.4 | 0.053 | H-9»L+4 (14%)<br>H-4»L+10 (19%)                                        | 140 | 26087 | 383.3 | 0.007 | H-14»LUMO (11%)                                    |
| 115 | 25057 | 399.1 | 0.008 | H-26»L+4 (20%)<br>H-23»L+7 (15%)                                       | 141 | 26107 | 383.0 | 0.013 | H-8»L+9 (19%)<br>H-7»L+9 (16%)                     |
| 116 | 25098 | 398.4 | 0.002 | H-10»LUMO (18%)<br>H-8»L+5 (11%)                                       | 142 | 26143 | 382.5 | 0.005 | H-33»LUMO (12%)                                    |
| 117 | 25105 | 398.3 | 0.000 | H-19»L+3 (10%)<br>H-19»L+7 (14%)<br>H-19»L+9 (20%)                     | 143 | 26184 | 381.9 | 0.000 | H-37»LUMO (10%)<br>H-37»L+1 (13%)                  |
| 118 | 25150 | 397.6 | 0.012 | H-5»L+9 (10%)                                                          | 144 | 26189 | 381.8 | 0.026 | H-17»LUMO (14%)<br>H-11»L+2 (10%)                  |
| 119 | 25165 | 397.4 | 0.001 | H-15»L+7 (16%)<br>H-15»L+8 (23%)                                       | 145 | 26223 | 381.3 | 0.011 | H-7»L+8 (20%)<br>H-5»L+11 (12%)                    |
| 120 | 25185 | 397.1 | 0.032 | H-7»L+7 (14%)<br>H-6»L+9 (19%)<br>H-4»L+10 (13%)                       | 146 | 26240 | 381.1 | 0.069 | H-16»LUMO (10%)<br>H-5»L+10 (14%)                  |
| 121 | 25217 | 396.6 | 0.008 | H-4»L+11 (35%)<br>H-3»L+12 (11%)                                       | 147 | 26277 | 380.6 | 0.007 | H-9»L+9 (20%)<br>H-8»L+8 (11%)<br>H-8»L+9 (11%)    |
| 122 | 25248 | 396.1 | 0.040 | H-8»L+6 (28%)<br>H-7»L+6 (13%)                                         | 148 | 26299 | 380.2 | 0.069 | H-8»L+8 (23%)<br>H-6»L+11 (10%)                    |
| 123 | 25286 | 395.5 | 0.026 | H-7»L+7 (23%)                                                          | 149 | 26335 | 379.7 | 0.057 | H-9»L+9 (14%)<br>H-4»L+12 (15%)                    |
| 124 | 25310 | 395.1 | 0.036 | H-11»LUMO (29%)<br>H-8»L+6 (10%)<br>H-7»L+7 (19%)                      | 150 | 26362 | 379.3 | 0.010 | H-9»L+9 (13%)                                      |
| 125 | 25385 | 393.9 | 0.025 | H-9»L+5 (12%)<br>H-9»L+6 (10%)<br>H-3»L+12 (19%)                       | 151 | 26417 | 378.5 | 0.061 | H-9»L+8 (10%)<br>H-4»L+12 (17%)<br>H-3»L+13 (13%)  |
| 126 | 25425 | 393.3 | 0.010 | H-9»L+6 (13%)<br>H-3»L+12 (28%)                                        | 152 | 26426 | 378.4 | 0.011 | H-12»L+2 (14%)<br>H-5»L+10 (12%)<br>H-4»L+12 (16%) |
| 127 | 25456 | 392.8 | 0.007 | H-3»L+12 (12%)<br>H-2»L+13 (26%)<br>H-1»L+16 (23%)                     | 153 | 26465 | 377.9 | 0.035 | H-13»L+1 (12%)                                     |
| 128 | 25504 | 392.1 | 0.025 | H-13»LUMO (12%)<br>H-11»L+1 (13%)                                      | 154 | 26478 | 377.7 | 0.019 | H-11»L+3 (10%)<br>H-9»L+8 (13%)                    |
| 129 | 25590 | 390.8 | 0.008 | H-11»L+1 (18%)<br>H-10»LUMO (10%)<br>H-10»L+1 (20%)                    | 155 | 26539 | 376.8 | 0.027 | H-4»L+12 (10%)<br>H-2»L+15 (18%)                   |
| 130 | 25621 | 390.3 | 0.005 | H-8»L+7 (12%)<br>H-2»L+13 (23%)<br>H-2»L+14 (16%)<br>H-1»L+16 (18%)    | 156 | 26583 | 376.2 | 0.020 | H-12»L+1 (16%)<br>H-3»L+13 (10%)                   |
| 131 | 25658 | 389.7 | 0.021 | H-8»L+7 (29%)<br>H-7»L+9 (11%)                                         | 157 | 26609 | 375.8 | 0.015 | H-13»L+2 (12%)<br>H-6»L+11 (11%)                   |
| 132 | 25704 | 389.0 | 0.005 | H-8»L+7 (26%)<br>H-7»L+8 (11%)<br>H-7»L+9 (11%)                        | 158 | 26636 | 375.4 | 0.014 |                                                    |
| 133 | 25748 | 388.4 | 0.023 | H-13»LUMO (10%)<br>H-12»LUMO (10%)<br>H-10»L+1 (10%)<br>H-10»L+2 (13%) | 159 | 26679 | 374.8 | 0.014 |                                                    |
|     |       |       |       |                                                                        | 160 | 26715 | 374.3 | 0.029 | H-11»L+3 (11%)<br>H-11»L+4 (19%)                   |
|     |       |       |       |                                                                        | 161 | 26741 | 374.0 | 0.012 |                                                    |
|     |       |       |       |                                                                        | 162 | 26817 | 372.9 | 0.045 | H-6»L+11 (19%)                                     |
|     |       |       |       |                                                                        | 163 | 26838 | 372.6 | 0.001 | H-14»L+2 (15%)                                     |
|     |       |       |       |                                                                        | 164 | 26883 | 372.0 | 0.008 | H-3»L+14 (19%)                                     |
|     |       |       |       |                                                                        | 165 | 26934 | 371.3 | 0.031 | H-16»L+2 (19%)                                     |
|     |       |       |       |                                                                        | 166 | 26966 | 370.8 | 0.022 | H-3»L+14 (10%)                                     |
|     |       |       |       |                                                                        | 167 | 27005 | 370.3 | 0.039 | H-11»L+5 (28%)                                     |
|     |       |       |       |                                                                        | 168 | 27040 | 369.8 | 0.033 | H-10»L+3 (12%)                                     |
|     |       |       |       |                                                                        | 169 | 27079 | 369.3 | 0.009 | H-10»L+5 (11%)                                     |
|     |       |       |       |                                                                        | 170 | 27103 | 369.0 | 0.002 | H-13»L+2 (14%)                                     |
|     |       |       |       |                                                                        | 171 | 27124 | 368.7 | 0.001 | H-16»LUMO (20%)<br>H-15»LUMO                       |

|     |       |       |       |                                                            |
|-----|-------|-------|-------|------------------------------------------------------------|
|     |       |       |       | (34%)<br>H-15»L+1 (17%)                                    |
| 172 | 27133 | 368.6 | 0.009 | H-25»LUMO<br>(11%)                                         |
| 173 | 27161 | 368.2 | 0.016 | H-22»LUMO<br>(14%)<br>H-17»LUMO<br>(17%)                   |
| 174 | 27186 | 367.8 | 0.002 | H-12»L+4 (11%)                                             |
| 175 | 27225 | 367.3 | 0.015 |                                                            |
| 176 | 27248 | 367.0 | 0.012 |                                                            |
| 177 | 27266 | 366.8 | 0.001 | H-18»LUMO<br>(49%)<br>H-18»L+1 (33%)                       |
| 178 | 27287 | 366.5 | 0.003 | H-20»LUMO<br>(28%)<br>H-20»L+2 (15%)                       |
| 179 | 27300 | 366.3 | 0.022 | H-19»LUMO<br>(13%)                                         |
| 180 | 27312 | 366.1 | 0.007 | H-20»LUMO<br>(12%)<br>H-19»LUMO<br>(40%)<br>H-19»L+1 (13%) |
| 181 | 27346 | 365.7 | 0.008 | H-21»LUMO<br>(39%)<br>H-21»L+1 (13%)                       |
| 182 | 27365 | 365.4 | 0.010 | H-21»LUMO<br>(12%)                                         |
| 183 | 27390 | 365.1 | 0.017 | H-10»L+5 (10%)                                             |

|     |       |       |       |                                                    |
|-----|-------|-------|-------|----------------------------------------------------|
| 184 | 27408 | 364.9 | 0.038 |                                                    |
| 185 | 27464 | 364.1 | 0.036 | H-7»L+11 (15%)                                     |
| 186 | 27475 | 364.0 | 0.023 | H-25»LUMO<br>(12%)                                 |
| 187 | 27503 | 363.6 | 0.010 | H-7»L+10 (11%)<br>H-5»L+12 (10%)<br>H-4»L+14 (10%) |
| 188 | 27510 | 363.5 | 0.005 | H-11»L+5 (12%)                                     |
| 189 | 27561 | 362.8 | 0.027 | H-12»L+3 (12%)<br>H-8»L+10 (10%)                   |
| 190 | 27594 | 362.4 | 0.011 | H-8»L+10 (30%)                                     |
| 191 | 27618 | 362.1 | 0.016 | H-11»L+6 (28%)                                     |
| 192 | 27629 | 361.9 | 0.050 | H-25»L+1 (11%)                                     |
| 193 | 27648 | 361.7 | 0.016 | H-11»L+7 (16%)                                     |
| 194 | 27667 | 361.4 | 0.019 | H-11»L+7 (10%)<br>H-10»L+7 (11%)                   |
| 195 | 27685 | 361.2 | 0.023 | H-12»L+3 (10%)                                     |
| 196 | 27714 | 360.8 | 0.020 | H-14»L+4 (15%)                                     |
| 197 | 27734 | 360.6 | 0.022 | H-7»L+11 (11%)                                     |
| 198 | 27772 | 360.1 | 0.037 | H-8»L+11 (13%)                                     |
| 199 | 27787 | 359.9 | 0.017 | H-5»L+12 (11%)                                     |
| 200 | 27806 | 359.6 | 0.011 | H-20»L+1 (10%)                                     |

[a] Oscillator strength. [b] Contributions smaller than 10% are not included. H = HOMO, L = LUMO. Orbitals are numbered consecutively regardless of possible degeneracies.

**Table S5.** Electronic transitions calculated for **7** using the TDA/B3LYP/6-31G(d,p) level of theory.

| No. | Energy (cm <sup>-1</sup> ) | $\lambda$ (nm) | f <sup>[a]</sup> | Major excitations <sup>[b]</sup>                                    |
|-----|----------------------------|----------------|------------------|---------------------------------------------------------------------|
| 1   | 15851                      | 630.9          | 0.149            | HOMO»LUMO (93%)                                                     |
| 2   | 16946                      | 590.1          | 0.110            | HOMO»L+1 (99%)                                                      |
| 3   | 16983                      | 588.8          | 0.139            | HOMO»L+2 (98%)                                                      |
| 4   | 17447                      | 573.2          | 0.330            | HOMO»L+3 (95%)                                                      |
| 5   | 18072                      | 553.4          | 0.409            | HOMO»L+4 (96%)                                                      |
| 6   | 18364                      | 544.5          | 0.072            | HOMO»L+5 (88%)                                                      |
| 7   | 19986                      | 500.4          | 0.053            | H-1»LUMO (87%)                                                      |
| 8   | 20249                      | 493.8          | 0.001            | H-1»L+2 (12%)<br>HOMO»L+6 (72%)                                     |
| 9   | 20500                      | 487.8          | 0.242            | H-1»L+1 (96%)                                                       |
| 10  | 20545                      | 486.7          | 0.059            | H-1»L+2 (79%)<br>HOMO»L+6 (10%)                                     |
| 11  | 20583                      | 485.8          | 0.013            | H-2»LUMO (91%)                                                      |
| 12  | 21159                      | 472.6          | 0.011            | H-2»L+1 (11%)<br>H-1»L+3 (74%)                                      |
| 13  | 21391                      | 467.5          | 0.008            | H-1»L+4 (83%)                                                       |
| 14  | 21470                      | 465.8          | 0.081            | H-3»LUMO (18%)<br>H-2»L+1 (56%)                                     |
| 15  | 21827                      | 458.1          | 0.125            | H-3»LUMO (53%)                                                      |
| 16  | 21863                      | 457.4          | 0.008            | H-2»L+2 (44%)<br>H-2»L+3 (21%)<br>H-1»L+4 (11%)                     |
| 17  | 21957                      | 455.4          | 0.031            | H-2»L+2 (20%)<br>H-2»L+3 (61%)                                      |
| 18  | 22148                      | 451.5          | 0.006            | H-3»L+2 (75%)                                                       |
| 19  | 22430                      | 445.8          | 0.142            | H-4»LUMO (67%)<br>H-2»L+2 (10%)                                     |
| 20  | 22482                      | 444.8          | 0.008            | HOMO»L+7 (76%)                                                      |
| 21  | 22674                      | 441.0          | 0.010            | H-3»L+1 (57%)<br>H-2»L+2 (11%)                                      |
| 22  | 22867                      | 437.3          | 0.023            | H-1»L+5 (61%)<br>HOMO»L+7 (13%)                                     |
| 23  | 23154                      | 431.9          | 0.094            | H-4»L+1 (61%)<br>H-3»L+3 (20%)                                      |
| 24  | 23237                      | 430.4          | 0.005            | HOMO»L+8 (80%)                                                      |
| 25  | 23422                      | 427.0          | 0.016            | H-2»L+4 (51%)<br>H-1»L+5 (11%)                                      |
| 26  | 23581                      | 424.1          | 0.033            | H-4»L+2 (14%)<br>H-4»L+3 (15%)<br>H-3»L+4 (10%)<br>H-1»L+6 (37%)    |
| 27  | 23657                      | 422.7          | 0.024            | H-4»L+1 (13%)<br>H-3»L+3 (64%)<br>H-2»L+4 (14%)                     |
| 28  | 23693                      | 422.1          | 0.093            | H-4»L+2 (26%)<br>H-3»L+1 (11%)<br>H-3»L+4 (13%)<br>H-1»L+6 (26%)    |
| 29  | 23757                      | 420.9          | 0.111            | H-4»L+2 (33%)<br>H-3»L+4 (34%)<br>H-2»L+5 (13%)                     |
| 30  | 23930                      | 417.9          | 0.129            | H-4»L+3 (52%)<br>H-1»L+6 (21%)                                      |
| 31  | 24307                      | 411.4          | 0.290            | H-3»L+4 (18%)<br>H-2»L+5 (68%)                                      |
| 32  | 24761                      | 403.9          | 0.017            | H-4»L+4 (71%)<br>H-2»L+6 (11%)                                      |
| 33  | 25181                      | 397.1          | 0.035            | H-4»L+4 (11%)<br>H-3»L+5 (25%)<br>H-2»L+6 (46%)                     |
| 34  | 25495                      | 392.2          | 0.527            | H-5»LUMO (12%)<br>H-3»L+5 (59%)<br>H-2»L+6 (11%)                    |
| 35  | 25796                      | 387.7          | 0.055            | H-4»L+5 (10%)<br>H-3»L+6 (54%)                                      |
| 36  | 25902                      | 386.1          | 0.020            | H-5»LUMO (55%)<br>H-4»L+5 (12%)                                     |
| 37  | 25903                      | 386.1          | 0.077            | H-5»LUMO (14%)<br>H-4»L+5 (46%)<br>H-1»L+7 (20%)                    |
| 38  | 26253                      | 380.9          | 0.063            | H-6»LUMO (58%)<br>H-5»L+1 (13%)                                     |
| 39  | 26278                      | 380.6          | 0.003            | H-7»LUMO (62%)<br>H-1»L+8 (12%)                                     |
| 40  | 26368                      | 379.2          | 0.193            | H-5»L+1 (37%)<br>H-1»L+7 (21%)                                      |
| 41  | 26442                      | 378.2          | 0.000            | H-11»L+4 (23%)<br>H-10»LUMO (48%)<br>H-10»L+3 (11%)                 |
| 42  | 26475                      | 377.7          | 0.010            | H-11»LUMO (44%)<br>H-11»L+3 (10%)<br>H-10»L+4 (22%)                 |
| 43  | 26517                      | 377.1          | 0.039            | H-12»L+1 (15%)<br>H-12»L+3 (13%)<br>H-5»L+2 (20%)                   |
| 44  | 26559                      | 376.5          | 0.033            | H-14»L+2 (13%)<br>H-12»L+1 (17%)<br>H-12»L+3 (15%)<br>H-5»L+2 (13%) |
| 45  | 26579                      | 376.2          | 0.006            | H-13»L+1 (20%)<br>H-13»L+3 (17%)                                    |
| 46  | 26608                      | 375.8          | 0.017            | H-15»L+2 (33%)<br>H-14»L+2 (10%)<br>H-13»L+1 (10%)                  |
| 47  | 26661                      | 375.1          | 0.021            | H-14»L+2 (16%)<br>H-5»L+2 (18%)                                     |
| 48  | 26748                      | 373.9          | 0.103            | H-5»L+1 (21%)<br>H-4»L+5 (16%)<br>H-1»L+7 (20%)                     |
| 49  | 26777                      | 373.5          | 0.008            | H-2»L+7 (19%)<br>H-1»L+8 (36%)                                      |
| 50  | 26952                      | 371.0          | 0.002            | H-7»L+2 (11%)<br>H-5»L+2 (20%)<br>H-5»L+3 (40%)                     |

[a] Oscillator strength. [b] Contributions smaller than 10% are not included. H = HOMO, L = LUMO. Orbitals are numbered consecutively regardless of possible degeneracies.

## NMR Spectra

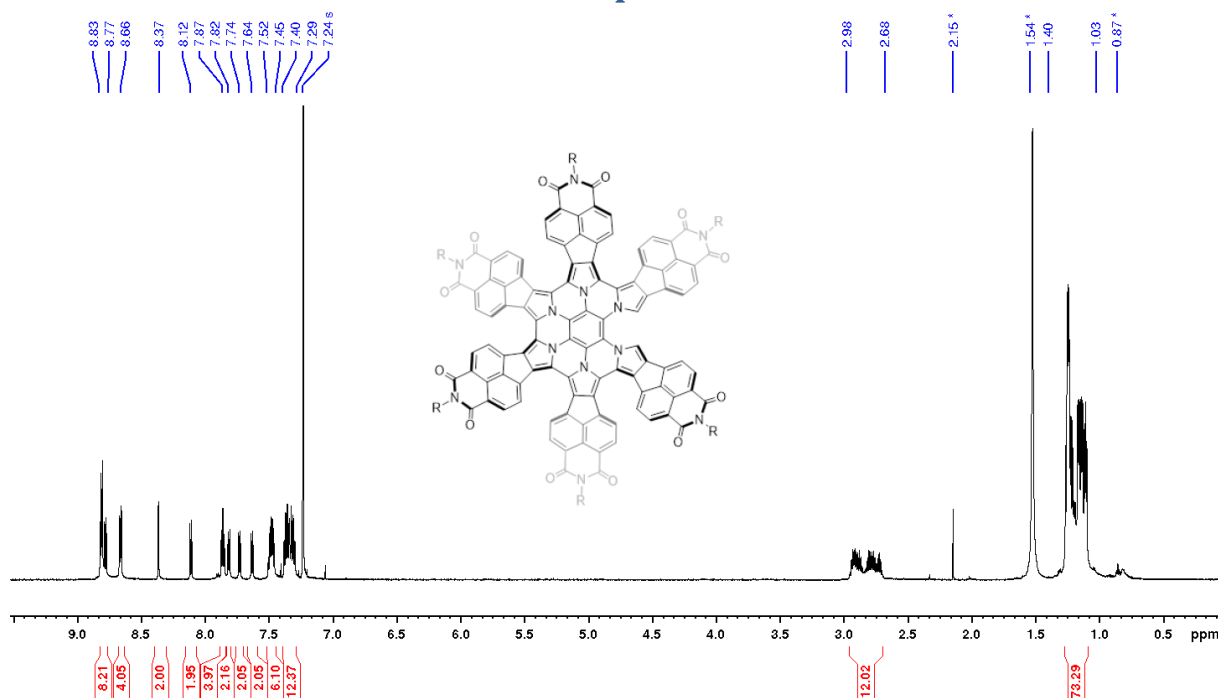

**Figure S28.** <sup>1</sup>H NMR spectrum of 6 (600 MHz, chloroform-*d*, 300 K).

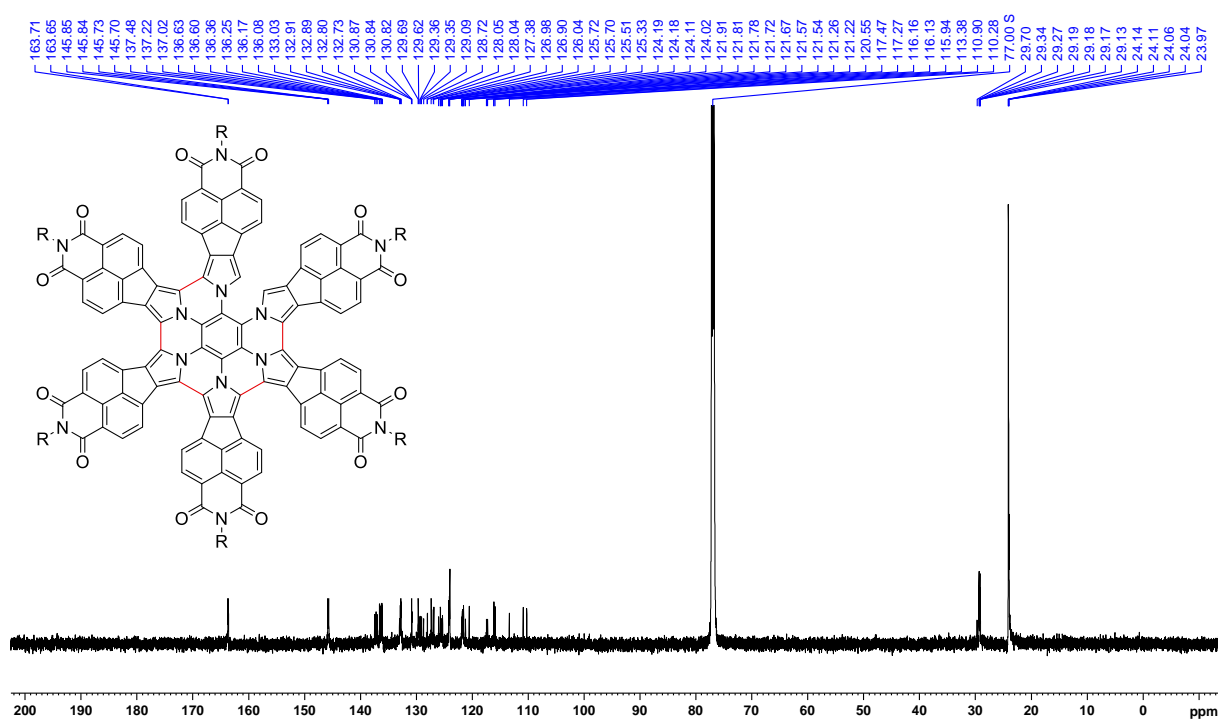

**Figure S29.** <sup>13</sup>C NMR spectrum of 6 (151 MHz, chloroform-*d*, 300 K).

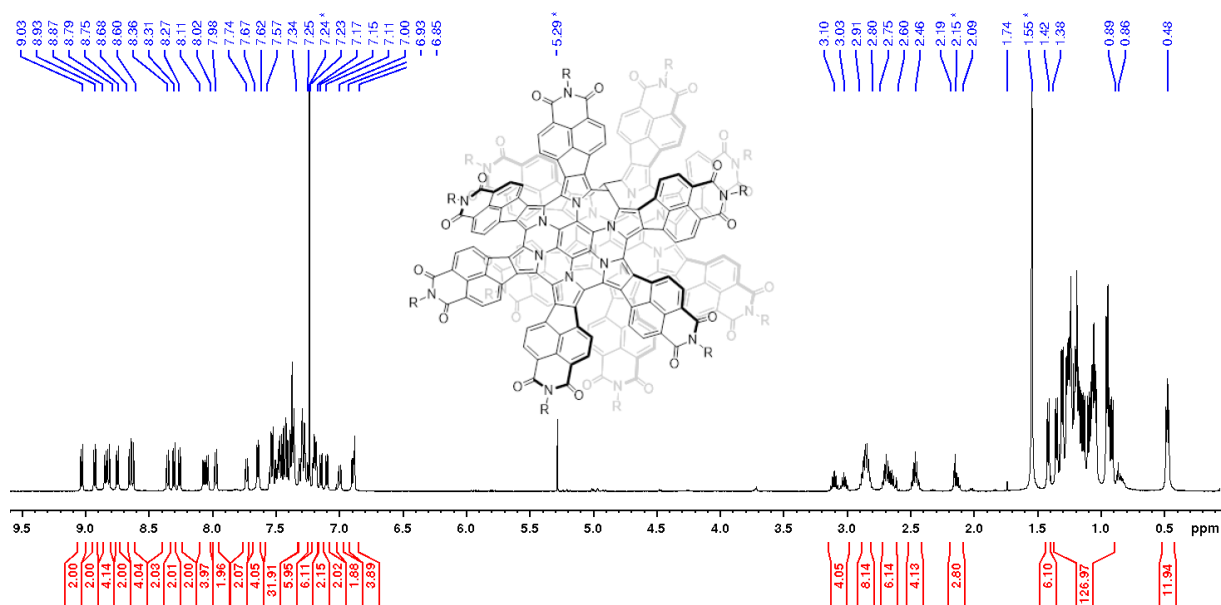

Figure S30. <sup>1</sup>H NMR spectrum of **42** (600 MHz, chloroform-d, 300 K).

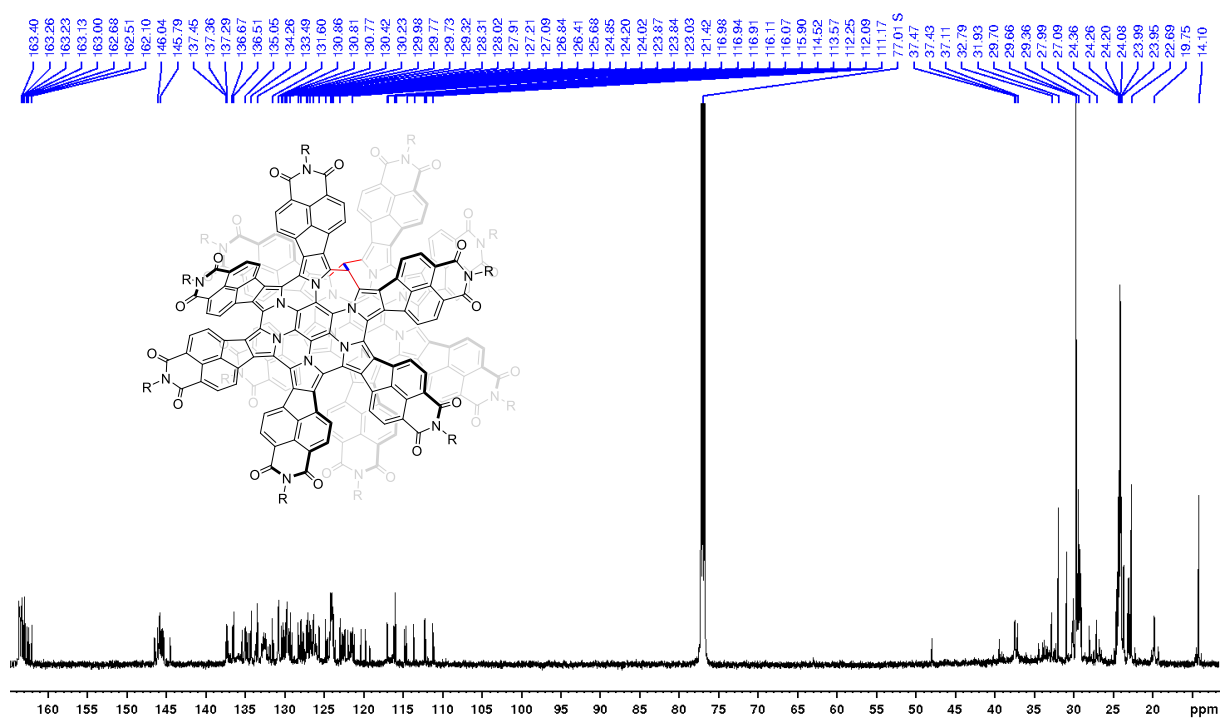

Figure S31. <sup>13</sup>C NMR spectrum of **42** (151 MHz, chloroform-d, 300 K).



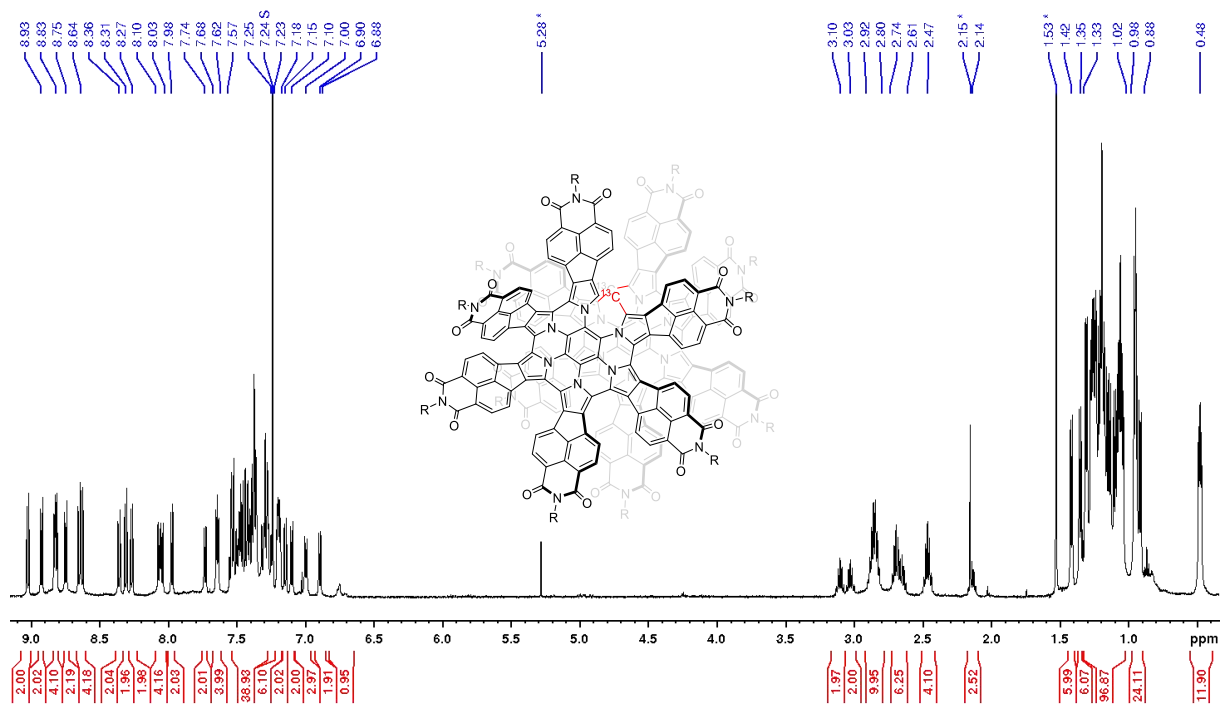

Figure S32.  $^1\text{H}$  NMR spectrum of  $4_2\text{-c}_2$  (600 MHz, chloroform- $d$ , 300 K).

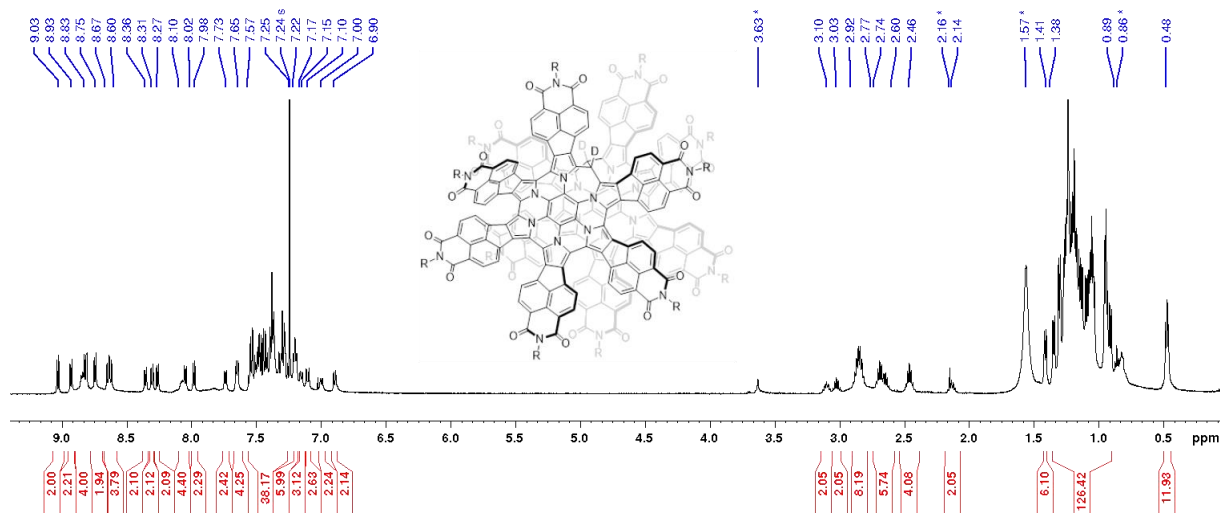

Figure S33.  $^1\text{H}$  NMR spectrum of  $4_2\text{-d}_2$  (600 MHz, chloroform- $d$ , 300 K).

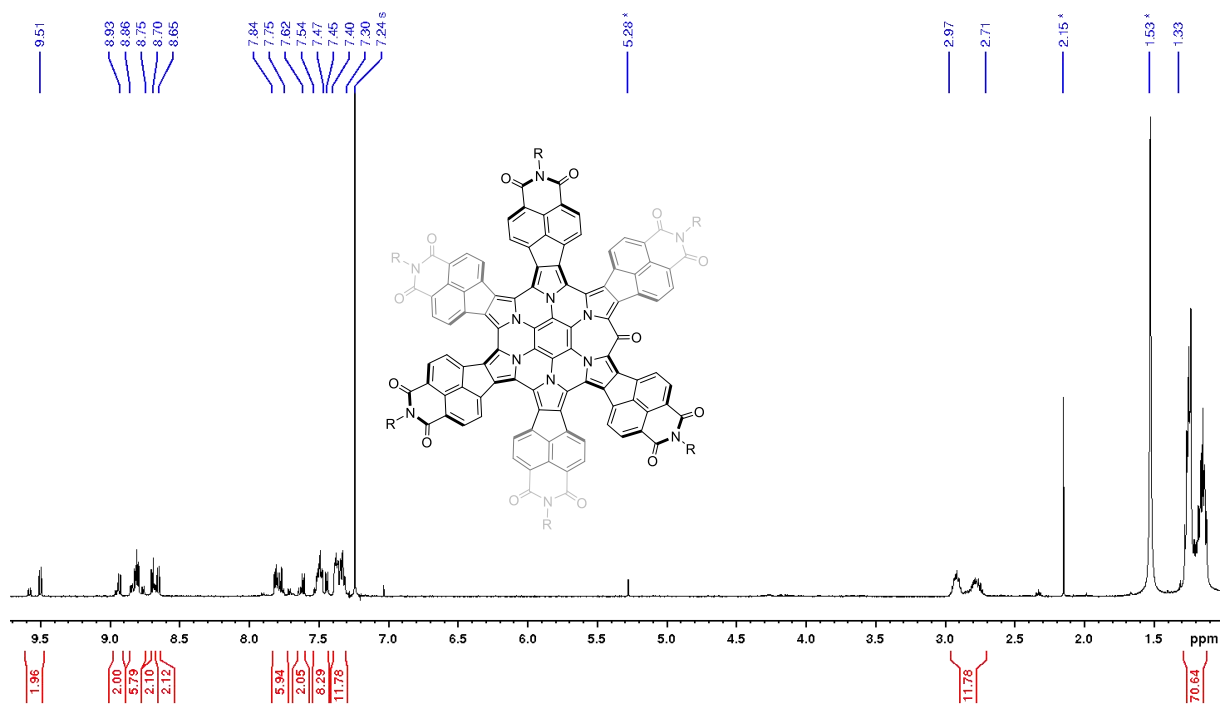

Figure S34.  $^1\text{H}$  NMR spectrum of **7** (600 MHz, chloroform-*d*, 300 K).

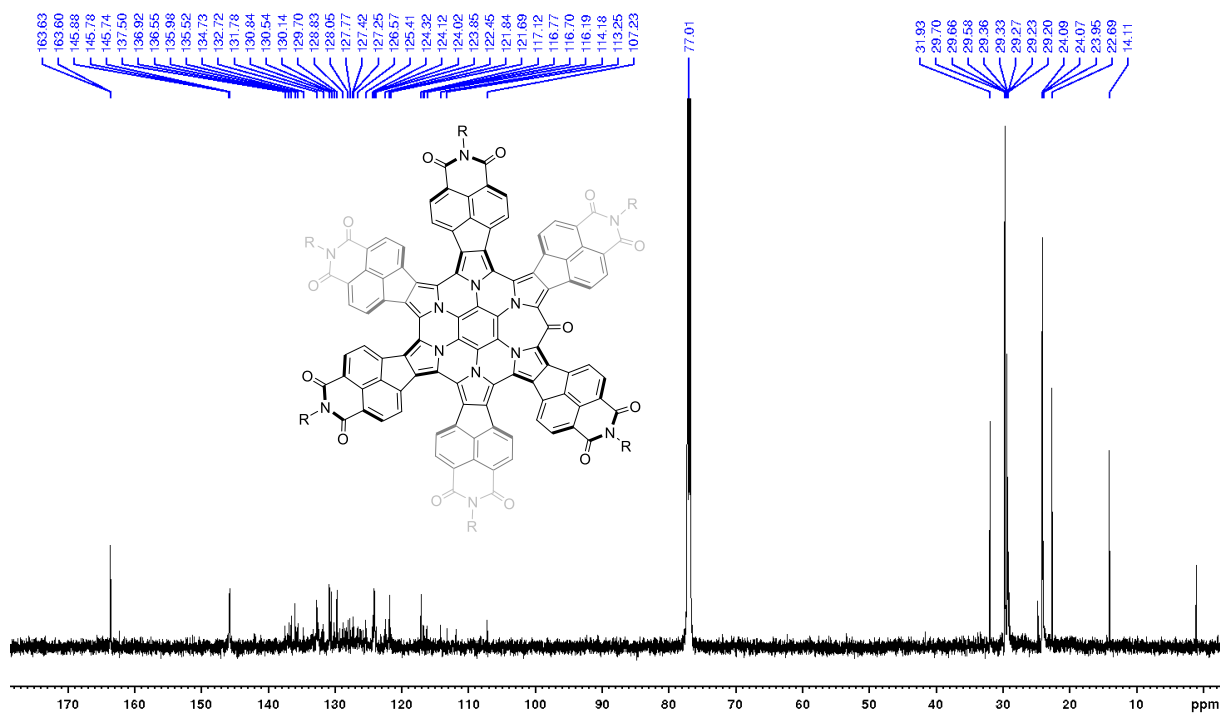

Figure S35.  $^{13}\text{C}$  NMR spectrum of **7** (151 MHz, chloroform-*d*, 300 K).

## Mass Spectra

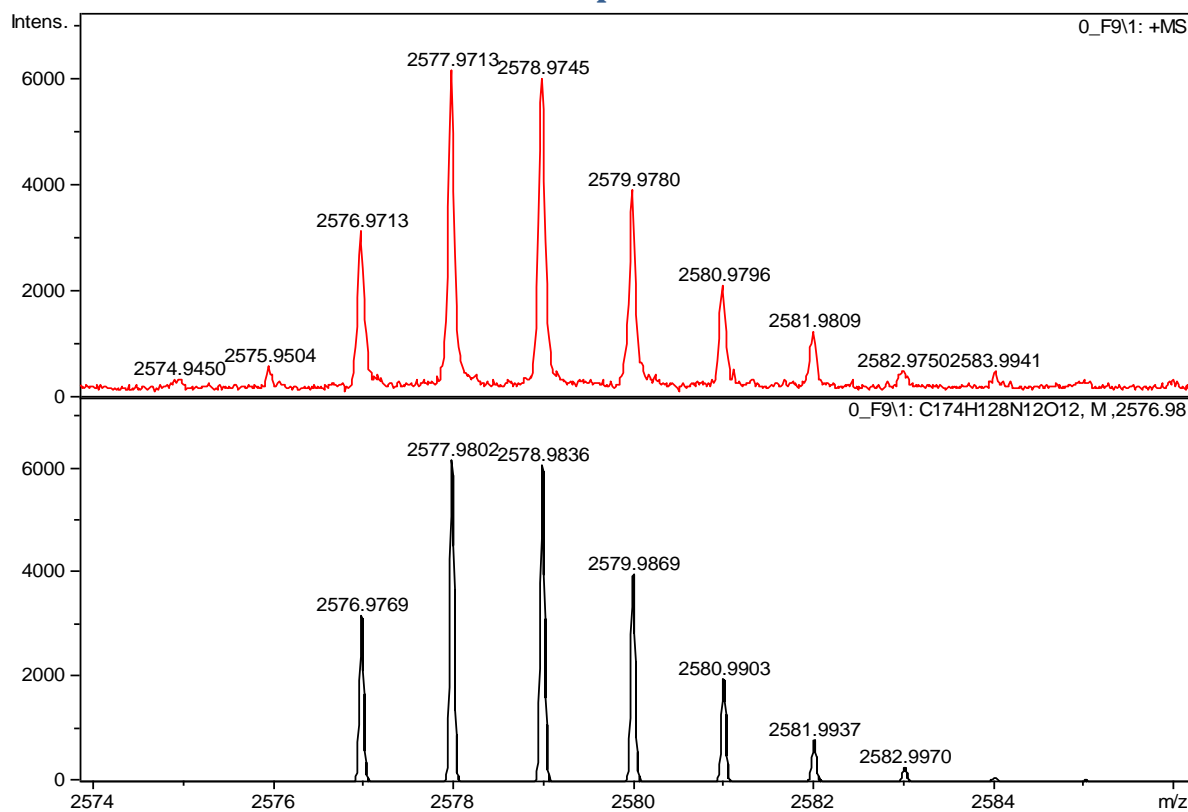

Figure S36. High resolution mass spectrum of **6** (MALDI-TOF, top: experimental, bottom: simulated).

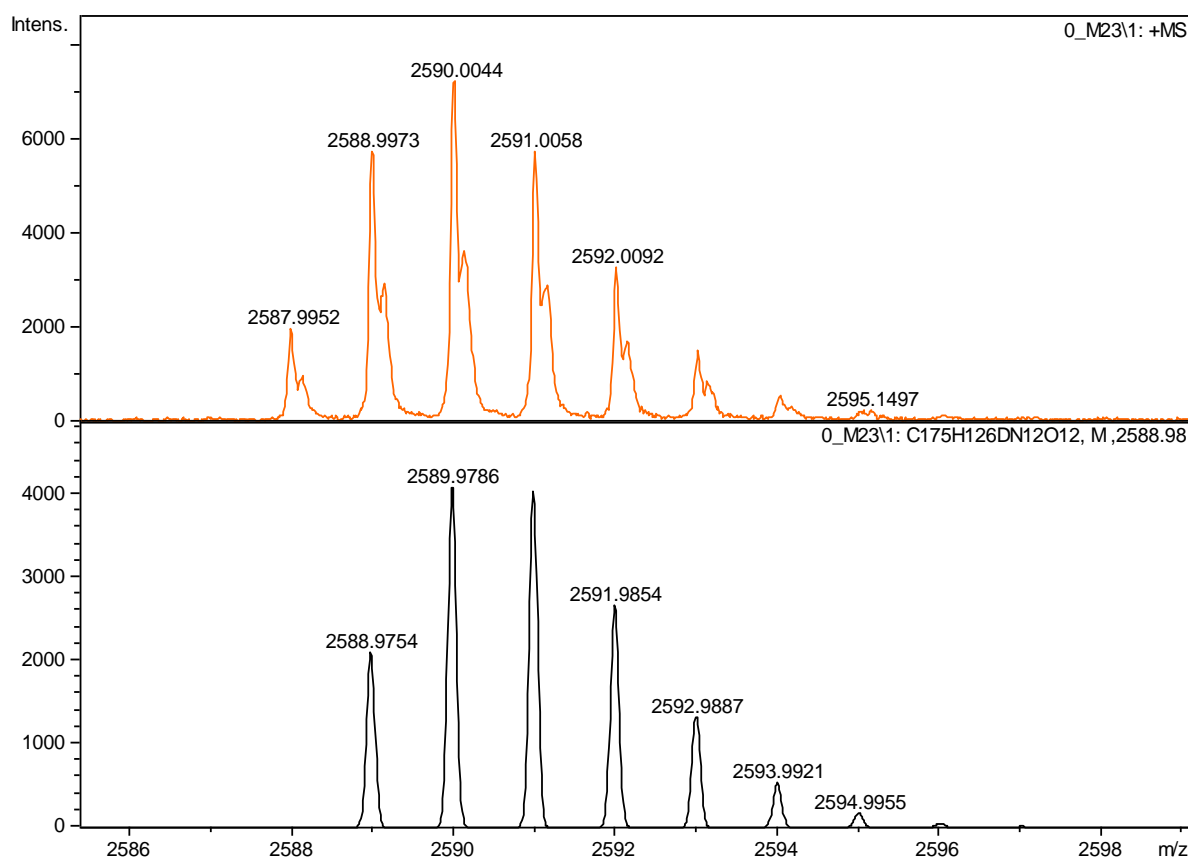

Figure S37. High resolution mass spectrum of **4-d** (MALDI-TOF, top: experimental, bottom: simulated).

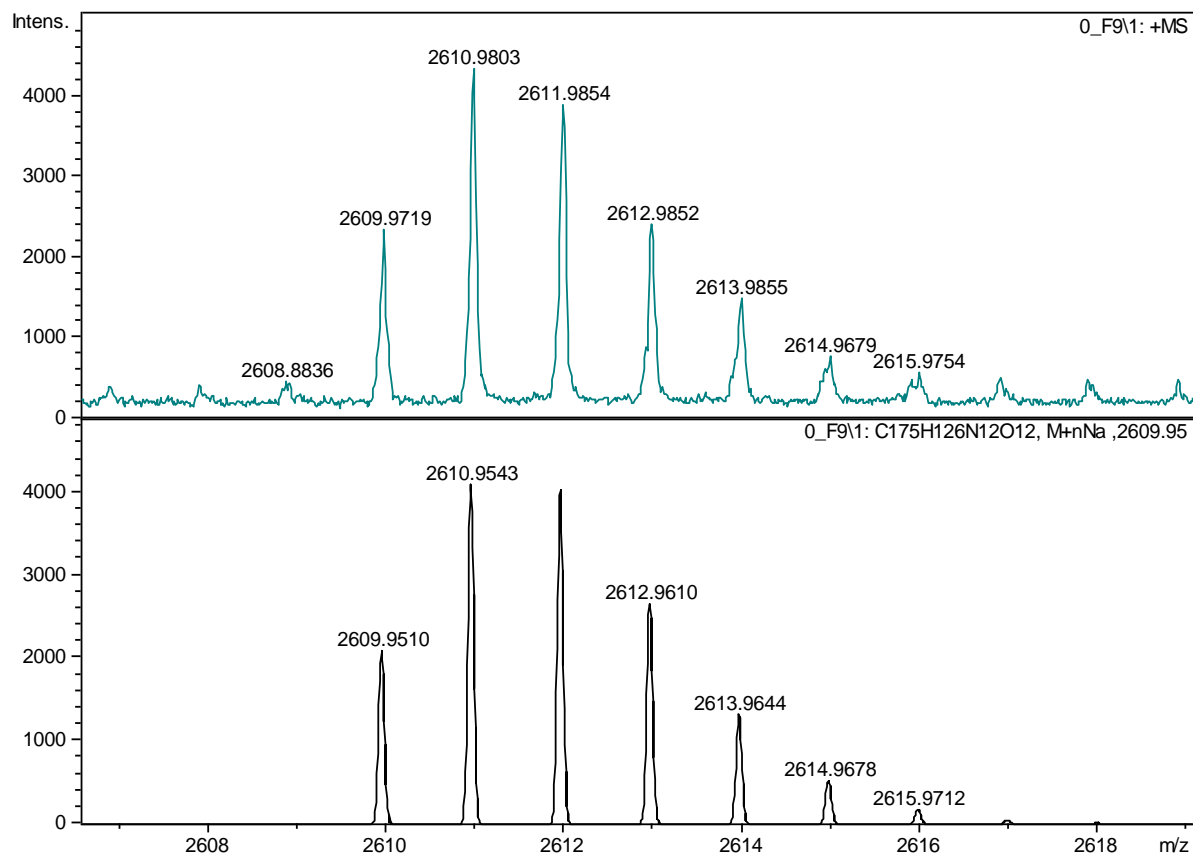

**Figure S38.** High resolution mass spectrum of **7** (MALDI-TOF, top: experimental, bottom: simulated).

## References

- (1) Żyła-Karwowska, M.; Zhylitskaya, H.; Cybińska, J.; Lis, T.; Chmielewski, P. J.; Stępień, M. An Electron-Deficient Azacoronene Obtained by Radial  $\pi$  Extension. *Angew. Chem. Int. Ed.* **2016**, *55* (47), 14658–14662. <https://doi.org/10.1002/anie.201608400>.
- (2) Frisch, M. J.; Trucks, G. W.; Schlegel, H. B.; Scuseria, G. E.; Robb, M. A.; Cheeseman, J. R.; Scalmani, G.; Barone, V.; Petersson, G. A.; Nakatsuji, H.; Li, X.; Caricato, M.; Marenich, A. V.; Bloino, J.; Janesko, B. G.; Gomperts, R.; Mennucci, B.; Hratchian, H. P.; Ortiz, J. V.; Izmaylov, A. F.; Sonnenberg, J. L.; Williams-Young, D.; Ding, F.; Lipparini, F.; Egidi, F.; Goings, J.; Peng, B.; Petrone, A.; Henderson, T.; Ranasinghe, D.; Zakrzewski, V. G.; Gao, J.; Rega, N.; Zheng, G.; Liang, W.; Hada, M.; Ehara, M.; Toyota, K.; Fukuda, R.; Hasegawa, J.; Ishida, M.; Nakajima, T.; Honda, Y.; Kitao, O.; Nakai, H.; Vreven, T.; Throssell, K.; Montgomery, J. A., Jr.; Peralta, J. E.; Ogliaro, F.; Bearpark, M. J.; Heyd, J. J.; Brothers, E. N.; Kudin, K. N.; Staroverov, V. N.; Keith, T. A.; Kobayashi, R.; Normand, J.; Raghavachari, K.; Rendell, A. P.; Burant, J. C.; Iyengar, S. S.; Tomasi, J.; Cossi, M.; Millam, J. M.; Klene, M.; Adamo, C.; Cammi, R.; Ochterski, J. W.; Martin, R. L.; Morokuma, K.; Farkas, O.; Foresman, J. B.; Fox, D. J. *Gaussian 16, Revision B.01*; Wallingford CT, 2016.
- (3) Becke, A. D. Density-Functional Exchange-Energy Approximation with Correct Asymptotic Behavior. *Phys. Rev. A* **1988**, *38* (6), 3098–3100.
- (4) Becke, A. D. Density-functional Thermochemistry. III. The Role of Exact Exchange. *J. Chem. Phys.* **1993**, *98* (7), 5648–5652. <https://doi.org/10.1063/1.464913>.
- (5) Lee, C.; Yang, W.; Parr, R. G. Development of the Colle-Salvetti Correlation-Energy Formula into a Functional of the Electron Density. *Phys. Rev. B* **1988**, *37* (2), 785–789. <https://doi.org/10.1103/PhysRevB.37.785>.
- (6) Chai, J.-D.; Head-Gordon, M. Long-Range Corrected Hybrid Density Functionals with Damped Atom-Atom Dispersion Corrections. *Phys. Chem. Chem. Phys. PCCP* **2008**, *10* (44), 6615–6620. <https://doi.org/10.1039/b810189b>.
- (7) Hirata, S.; Head-Gordon, M. Time-Dependent Density Functional Theory within the Tamm–Dancoff Approximation. *Chem. Phys. Lett.* **1999**, *314* (3–4), 291–299. [https://doi.org/10.1016/S0009-2614\(99\)01149-5](https://doi.org/10.1016/S0009-2614(99)01149-5).
- (8) Grimme, S.; Bannwarth, C.; Shushkov, P. A Robust and Accurate Tight-Binding Quantum Chemical Method for Structures, Vibrational Frequencies, and Noncovalent Interactions of Large Molecular Systems Parametrized for All Spd-Block Elements ( $Z = 1–86$ ). *J. Chem. Theory Comput.* **2017**, *13* (5), 1989–2009. <https://doi.org/10.1021/acs.jctc.7b00118>.
- (9) Bannwarth, C.; Ehlert, S.; Grimme, S. GFN2-XTB—An Accurate and Broadly Parametrized Self-Consistent Tight-Binding Quantum Chemical Method with Multipole Electrostatics and Density-Dependent Dispersion Contributions. *J. Chem. Theory Comput.* **2019**, *15* (3), 1652–1671. <https://doi.org/10.1021/acs.jctc.8b01176>.
- (10) Sheldrick, G. M. A Short History of SHELX. *Acta Crystallogr. A* **2008**, *64* (1), 112–122. <https://doi.org/10.1107/S0108767307043930>.
